# Supplementary material for: Framework for community functioning: synthesis of stress gradient and resource partitioning concepts
Source: PeerJ. 2017 Oct 2;5:e3885. doi: 10.7717/peerj.3885 (PMC5628606; doi:10.7717/peerj.3885)
Supplement: Supplemental Information 1 — Guild affiliation, absolute, and relative abundance for all species in each of the studied guilds across the three groups where the shared preference (Table 1), the distinct preference (Table 2), and the facilitative mode (Table 3) were tested. [file peerj-05-3885-s001.xlsx]

## Sheet: Shared preference
Taxon Name	Guild	Mean cells/cm^2 (density)	Maximum cells/cm^2 (density)	Mean percent density (%)	Maximum percent density (%)
Cocconeis placentula var. lineata	low profile	37963.1	463951	5.39191	99
Achnanthidium exiguum	low profile	69370.1	1.36321e+06	5.60974	97.5
Achnanthidium deflexum	low profile	63672.8	1.89705e+06	6.73604	88.707
Achnanthidium minutissimum	low profile	101666	1.36757e+06	9.53643	81.3314
Navicula minima	motile	119664	6.57716e+06	7.22278	80.8333
Nitzschia inconspicua	motile	110268	3.84597e+06	8.36567	79.3729
Amphora inariensis	low profile	26977.8	256174	3.41256	76.8333
Achnanthidium rivulare	low profile	217208	7.37595e+06	8.89857	74.1667
Amphora pediculus	low profile	123265	1.25201e+06	13.2288	69.6839
Cocconeis placentula var. euglypta	low profile	32045.4	613125	3.19949	68
Craticula molestiformis	motile	64745.9	2.51354e+06	3.07545	58.3732
Rossithidium linearis	low profile	277638	2.34703e+06	10.2167	55.8776
Nitzschia frustulum	motile	40145.8	1.13803e+06	4.83008	54.1667
Achnanthes subhudsonis var. kraeuselii	low profile	153048	1.58855e+06	8.34263	52.5
Nitzschia amphibia	motile	114808	7.80341e+06	4.30221	47.1667
Luticola goeppertiana	motile	103356	1.40179e+06	3.47686	43.1667
Reimeria sinuata	low profile	36821.5	1.28199e+06	2.68321	42.5
Encyonopsis microcephala	low profile	15075.1	157427	3.00363	42.1927
Navicula recens	motile	53131.3	1.23156e+06	6.65392	41.1667
Navicula subminuscula	motile	20975	527297	2.73692	37.8333
Cyclotella meneghiniana	low profile	31918.9	1.19509e+06	3.30809	36.7089
Sellaphora seminulum	motile	48227.1	2.89841e+06	2.54015	34.4942
Gyrosigma spencerii	motile	11386.1	168879	2.12681	32.0598
Navicula erifuga	motile	14353.7	439078	2.31926	29.5
Navicula cryptotenella	motile	44859.9	763103	4.153	27.1215
Navicula schroeteri var. escambia	motile	12661.3	142629	1.85286	27.0764
Nitzschia fonticola	motile	46435.2	1.90668e+06	2.03621	26.6223
Cocconeis placentula	low profile	14328.2	231426	2.03798	26.5
Cocconeis pseudolineata	low profile	69130.9	130064	9.12344	26.3333
Cocconeis pediculus	low profile	33879.6	692208	2.76371	26.3333
Platessa conspicua	low profile	7055.2	50397.2	1.36488	25.6039
Navicula gregaria	motile	15920.6	489571	1.68892	24.7492
Navicula germainii	motile	17289.5	202985	2.02104	24.3421
Nitzschia tropica	motile	79567.7	910800	2.53256	23.0889
Mayamaea atomus	motile	12176.8	196469	1.93017	22.9236
Navicula lanceolata	motile	15251	308425	1.48119	22.8333
Navicula tripunctata	motile	36128.8	639833	3.01959	22.6667
Navicula cincta	motile	5604.03	35728.3	2.42685	22.5329
Nitzschia dissipata	motile	34065.6	919194	2.83791	22.4253
Fistulifera pelliculosa	motile	252835	5.12796e+06	2.9026	20.3333
Nitzschia capitellata	motile	14443.1	176961	1.99222	18.7107
Planothidium frequentissimum	low profile	16247	656646	1.36681	18.5
Nitzschia palea	motile	27479.6	1.44462e+06	2.40315	18.3333
Karayevia ploenensis	low profile	23454.7	170057	2.42321	17.5788
Nitzschia palea var. debilis	motile	12580.4	180086	2.15648	16.7774
Fallacia tenera	motile	5534.35	37969	1.18174	16.3333
Navicula sp. 1 ANS NAWQA DW	motile	17466.8	99912.4	2.95238	16
Navicula capitatoradiata	motile	34471.3	773397	1.98062	15.6667
Sellaphora hustedtii	motile	47286.1	191684	2.92444	15.1667
Achnanthidium affine	low profile	12449.9	105063	2.12575	15.1414
Simonsenia delognei	motile	8547.44	49398.9	2.03991	15.0165
Diploneis puella	motile	8656.76	46341.2	2.18286	15
Navicula tenelloides	motile	3389.47	43156.9	1.00236	14.8515
Navicula menisculus	motile	16417.6	274122	1.12254	14
Amphora ovalis	low profile	9407.97	84721.5	1.24935	11.7745
Navicula reichardtiana	motile	10921.3	154310	1.14217	11.646
Navicula cf. heufleri fo. minuta CODY	motile	35519.8	35519.8	11.4875	11.4875
Achnanthidium sp. 0A UL NAWQA KM	low profile	252114	387706	10.8362	11.3565
Navicula rostellata	motile	7635.23	87618.8	1.0778	11.1667
Cocconeis neodiminuta	low profile	13479.8	47632.2	1.64523	11
Navicula radiosafallax	motile	31364.9	147396	2.44398	10.3333
Planothidium lanceolatum	low profile	9729.92	157595	1.292	10.3333
Planothidium rostratum	low profile	13054.2	445909	0.842116	10
Navicula sp. 5 SCTX MP	motile	52501.3	52501.3	9.96678	9.96678
Navicula submuralis	motile	9830.43	87016.4	1.21309	9.66667
Navicula caterva	motile	24934.4	219807	2.17135	9.5
Bacillaria paradoxa	motile	9228.11	36148.3	1.2619	9.33333
Navicula symmetrica	motile	12360.6	222955	1.2748	8.83333
Navicula secreta var. apiculata	motile	18578	111477	1.2147	8.83333
Nitzschia sigmoidea	motile	2445.03	10231.9	1.08702	8.81864
Navicula canalis	motile	6964.11	66450	1.27299	8.66667
Nitzschia filiformis	motile	12306.9	83697.9	1.48185	8.63787
Nitzschia archibaldii	motile	29697.9	552426	1.39933	8.33333
Nitzschia intermedia	motile	6559.09	81115.7	1.42273	7.8203
Navicula veneta	motile	10590.9	167142	1.83921	7.80731
Nitzschia recta	motile	5760.66	68547.5	0.861577	7.66667
Planothidium minutissimum	low profile	10256.3	51152.4	1.66068	7.66667
Amphora copulata	low profile	8708.7	180933	0.7104	7.16667
Geissleria decussis	motile	10830.9	168310	0.789692	6.95103
Surirella biseriata	motile	3614.87	10355.2	2.21219	6.82196
Nitzschia desertorum	motile	12781.2	187603	0.837544	6.81063
Nitzschia paleacea	motile	32130.5	247495	1.04102	6.33333
Navicula ingenua	motile	4585.51	23043.9	1.41982	6.3228
Karayevia clevei	low profile	4089.93	46337.7	0.478025	6.16667
Navicula arvensis	motile	4074.07	16859.7	1.4272	6.1157
Nitzschia sociabilis	motile	8840.81	65629.2	0.965988	5.98007
Nitzschia reversa	motile	10125.2	56508.6	1.61273	5.97484
Nitzschia siliqua	motile	10799.6	39965	1.81195	5.83333
Amphora veneta	low profile	19965.9	331456	0.95888	5.83333
Nitzschia agnita	motile	8893.21	32701.8	1.12077	5.82363
Navicula slesvicensis	motile	108984	108984	5.66667	5.66667
Navicula cryptotenelloides	motile	18473.1	30643.2	1.99696	5.66667
Navicula antonii	motile	11590.8	107953	1.02109	5.29801
Navicula kotschyi	motile	5575.62	50869.4	1.228	5.21173
Tryblionella apiculata	motile	4401.36	49956.2	0.573243	5
Planothidium stewartii	low profile	18374.1	35280	2.83333	5
Reimeria sinuata fo. antiqua	low profile	7479.68	29813.8	0.958333	5
Navicula exilis	motile	6673.36	33566.4	1.37063	4.98442
Nitzschia linearis	motile	7016.12	92186.6	0.653872	4.9505
Caloneis bacillum	motile	9621.95	121031	0.774024	4.90196
Sellaphora pupula	motile	8083.22	165728	0.606808	4.86224
Planothidium delicatulum	low profile	3801.95	20929.3	1.06963	4.83333
Mayamaea atomus var. permitis	motile	1969.09	7513.56	1.30062	4.66667
Achnanthidium exilis	low profile	4532.97	15249.8	1.2679	4.66667
Navicula upsaliensis	motile	102402	102402	4.6252	4.6252
Gyrosigma acuminatum	motile	3759.91	24606	0.950399	4.5977
Tryblionella victoriae	motile	3656.14	35801.5	0.666502	4.5388
Navicula trivialis	motile	5989.65	98797.7	0.906928	4.50751
Navicula cf. pseudolanceolata	motile	17910.2	41302.5	1.72222	4.5
Surirella brebissonii	motile	7566.78	132250	0.692331	4.5
Nitzschia dissipata var. media	motile	10869.8	114753	1.06135	4.33333
Navicula sublucidula	motile	4216.56	7494.96	2.33333	4.33333
Navicula cari	motile	9056.37	75057.1	1.2385	4.32612
Nitzschia heufleriana	motile	8446.79	96673.2	0.952952	4.29043
Nitzschia solita	motile	3949.91	16831	0.707654	4.16667
Surirella minuta	motile	6465.76	79929.9	0.736985	4
Navicula meniscus	motile	3026.13	8441.46	0.684402	3.83333
Achnanthidium pyrenaicum	low profile	9325.72	16001.6	2.08333	3.83333
Nitzschia supralitorea	motile	16547.5	105241	1.24889	3.8206
Pleurosigma angulatum	motile	16929.1	28872.2	1.91349	3.66032
Nitzschia subacicularis	motile	8826.64	39045.7	1.46863	3.64842
Brachysira microcephala	motile	5016.76	12322.8	1.81885	3.64238
Fallacia monoculata	motile	2386.64	10549.5	1.04036	3.63036
Achnanthes lemmermannii	low profile	7676.92	15155.7	1.91611	3.5
Pleurosigma elongatum	motile	10095.2	10095.2	3.5	3.5
Navicula pseudoventralis	motile	6872.52	15027.1	1.80584	3.5
Nitzschia sinuata var. delognei	motile	4572.1	5697.17	1.77778	3.5
Navicula sp. 47 NAWQA HAMSHER	motile	12877.3	52054.8	1.18598	3.48259
Hippodonta capitata	motile	3991.79	67923.4	0.462181	3.33333
Geissleria paludosa	motile	4143.02	10243.8	1.13333	3.33333
Nitzschia sinuata var. tabellaria	motile	12425.3	63946.6	0.862667	3.33333
Gyrosigma attenuatum	motile	9752.08	80687.2	0.692869	3.26797
Navicula ruttneri var. capitata	motile	11363.5	20295.2	2.08333	3.16667
Reimeria uniseriata	low profile	5682.06	24132	0.914913	3.1614
Navicula subrotundata	motile	9391.5	14049	1.41535	3.1614
Navicula gysingensis	motile	8435.86	15254.1	1.23232	3.0303
Navicula ventralis	motile	13043.9	24250.8	1.84367	3.02067
Navicula tantula	motile	9818.44	88600	0.842038	3.01003
Achnanthes oblongella	low profile	3105.12	10002.4	0.874724	3
Navicula notha	motile	1870.01	5054.72	0.822039	2.94599
Navicula cryptocephala	motile	5242.12	52531.6	0.482925	2.87081
Surirella brebissonii var. kuetzingii	motile	7085.52	36605.5	0.764433	2.84281
Navicula seminuloides	motile	1193.7	1193.7	2.83333	2.83333
Navicula ochridana	motile	14666.9	39489.2	1.11111	2.83333
Nitzschia suchlandti	motile	4697.53	14939.4	0.791187	2.79146
Gyrosigma reimeri	motile	5660.8	68584.1	0.550826	2.77778
Nitzschia gracilis	motile	3227.12	8845.29	0.630912	2.73382
Tryblionella calida	motile	3502.84	20710.4	0.630538	2.65781
Navicula schroeteri	motile	6598.72	28097.9	1.18547	2.5
Diploneis parma	motile	1460.1	6603.62	0.816475	2.49584
Gyrosigma scalproides	motile	2340.18	8772.72	0.530238	2.33333
Tryblionella levidensis	motile	1330.49	2729.42	0.532923	2.33333
Fallacia lenzii	motile	5790.48	27531.5	0.697275	2.31788
Nitzschia angusteforaminata	motile	5283.61	26550.8	0.69	2.31023
Adlafia minuscula	motile	4966.28	16831	0.795713	2.16667
Navicula sp. 0T UL NAWQA KM	motile	21219.6	21219.6	2.1374	2.1374
Nitzschia palea var. tenuirostris	motile	4528.09	18122.3	0.920996	2.02177
Navicula salinarum	motile	3226.3	8129.09	0.951841	2.00669
Caloneis hyalina	motile	4773.12	16391.8	0.762421	2
Navicula sp. 1 Idaho DW	motile	29866.5	29866.5	2	2
Nitzschia microcephala	motile	4694.65	18055.9	0.641937	2
Planothidium granum	low profile	11199.8	11199.8	1.99667	1.99667
Craticula halophila	motile	2361.07	11009.6	0.499469	1.83333
Biremis circumtexta	motile	1513.34	2892.83	0.700223	1.83333
Tryblionella hungarica	motile	3195.7	14827.7	0.501804	1.83028
Navicula festiva	motile	9631.78	18016.9	1.02574	1.73502
Navicula phyllepta	motile	1054.8	1420.35	1.1689	1.67224
Geissleria aikenensis	motile	12066.6	21836.9	1.25	1.66667
Nitzschia dubia	motile	1750.68	4034.36	0.456126	1.66667
Geissleria acceptata	motile	3859.01	19754.3	0.499127	1.66667
Navicula sp. 6 ANS LLB	motile	37069.3	37069.3	1.66667	1.66667
Cocconeis neothumensis	low profile	2502.31	6026.15	0.470831	1.66667
Nitzschia linearis var. tenuis	motile	2702.6	7198	0.458333	1.66667
Caloneis branderii	motile	7955.29	39965	0.9	1.66667
Nitzschia bita	motile	4402.41	4402.41	1.66389	1.66389
Nitzschia pseudofonticola	motile	1775.29	4000.2	0.666834	1.5015
Hippodonta hungarica	motile	5395.12	30612.8	0.613182	1.5
Fallacia omissa	motile	3278.2	9180.25	0.463485	1.5
Surirella ovalis	motile	3463.9	4326.5	0.927567	1.5
Navicula pseudotenelloides	motile	2122.52	2122.52	1.5	1.5
Mayamaea agrestis	motile	2448.54	10065.8	0.365249	1.43678
Luticola mutica	motile	1862.13	17422.1	0.364142	1.33779
Surirella angusta	motile	5279.09	55242.6	0.408061	1.33779
Amphora montana	low profile	6320.97	111477	0.536718	1.33333
Nitzschia pusilla	motile	27845.7	78797.5	0.79802	1.33333
Nitzschia draveillensis	motile	543.84	721.699	0.75	1.33333
Navicula contenta var. biceps	motile	1691.33	4367.38	0.472222	1.33333
Nitzschia clausii	motile	5413.7	13527.5	0.481335	1.33111
Navicula viridulacalcis	motile	4521.47	15926.6	0.427057	1.3245
Cylindrotheca gracilis	motile	2249.09	3836.16	0.826455	1.32013
Nitzschia lacuum	motile	9172.1	18055.9	0.496255	1.31796
Navicula harderi	motile	5513.02	24717.6	0.627881	1.30719
Achnanthes minutissima var. jackii	low profile	3104.59	4071.96	0.715693	1.26582
Nitzschia angustatula	motile	2614.31	9094.09	0.453931	1.24611
Sellaphora mutata	motile	3921.38	14149.9	0.444451	1.16667
Pleurosigma salinarum	motile	4299.15	13317.8	0.580476	1.16667
Nitzschia levidensis var. salinarum	motile	456.326	1305.44	0.466063	1.16473
Navicula sp. 0Y UL NAWQA KM	motile	3562.96	3562.96	1.10759	1.10759
Nitzschia perminuta	motile	5365.87	43078.4	0.512803	1.09204
Nitzschia cf. tubicola	motile	1382.49	3187.67	0.489629	1.03093
Stauroneis sp. 6 SAVANNAH EAM	motile	732.18	968.766	0.610557	1
Navicula sp. 39 NAWQA WRC	motile	1577.91	1577.91	1	1
Navicula sanctaecrucis	motile	758.485	896.003	0.662866	1
Amphora sp. 1 ANS WRC	low profile	2859.65	10065.8	0.45765	1
Navicula incertata	motile	1121.74	1121.74	1	1
Stauroneis kriegeri	motile	4775.66	9178.33	0.666389	1
Nitzschia bacillum	motile	3031.2	4064.54	0.665837	1
Navicula sp. 5 ANS LLB	motile	22241.6	22241.6	1	1
Pinnularia subgibba	motile	3487.1	3733.26	0.832779	1
Navicula stroemii	motile	10155.2	12247.9	0.828407	1
Karayevia amoena	low profile	1729.61	1729.61	1	1
Achnanthidium microcephalum	low profile	3183.83	7004.61	0.498078	1
Geissleria schoenfeldii	motile	1188.15	2504.74	0.416667	1
Nitzschia umbonata	motile	6458	52531.6	0.433167	1
Surirella bifrons	motile	2238.14	4034.36	0.581699	1
Caloneis molaris	motile	2641.45	2641.45	0.998336	0.998336
Nitzschia liebethruthii	motile	3088.91	9163.12	0.441195	0.990099
Nitzschia tubicola	motile	2938.84	3000.56	0.661716	0.990099
Surirella splendida	motile	1746.65	4393.33	0.421781	0.986842
Craticula accomoda	motile	578.302	1564.74	0.388039	0.986842
Nitzschia dissipata fo. undulata	motile	5272.72	5272.72	0.985222	0.985222
Pinnularia gibba	motile	2264.94	3441.87	0.644239	0.981997
Navicula hintzii	motile	7106.63	19625.9	0.485577	0.96
Navicula viridula	motile	3256.97	9409.31	0.33195	0.833333
Navicula paucivisitata	motile	72301	138107	0.75	0.833333
Placoneis pseudanglica	motile	4992.07	9145.05	0.498634	0.833333
Surirella linearis	motile	11707.5	11707.5	0.833333	0.833333
Fallacia subhamulata	motile	6535.77	19204.7	0.422673	0.833333
Craticula cuspidata	motile	2497.08	10243.8	0.352561	0.831947
Surirella turgida	motile	2781.66	2781.66	0.75075	0.75075
Fallacia pygmaea	motile	1448.77	11359.6	0.294156	0.668896
Hantzschia amphioxys	motile	1043.73	4850.75	0.322765	0.668896
Achnanthes sp. 1 ?	low profile	964.135	1780.47	0.556114	0.668896
Encyonopsis minuta	low profile	5301.62	14534.1	0.444444	0.666667
Entomoneis alata	motile	8000.4	8000.4	0.666667	0.666667
Nitzschia aurariae	motile	2342.58	8000.4	0.378117	0.666667
Placoneis elginensis	motile	5264.55	16831	0.3301	0.666667
Nitzschia sigma	motile	4624.99	14906.9	0.368797	0.666667
Luticola naviculoides	motile	4715.68	6118.88	0.416667	0.666667
Navicula wallacei	motile	6118.88	6118.88	0.666667	0.666667
Placoneis clementis	motile	9185.49	9955.5	0.5	0.666667
Encyonopsis vandamii	low profile	8165.29	8165.29	0.666667	0.666667
Nitzschia nana	motile	1070.48	1331.91	0.5	0.666666
Navicula radiosa	motile	2067.74	6763.76	0.332859	0.666666
Tryblionella compressa	motile	1155.72	1937.53	0.5	0.666666
Diploneis peterseni	motile	1780.47	1780.47	0.666666	0.666666
Lemnicola hungarica	low profile	2794.66	8188.66	0.378001	0.666666
Nitzschia angustata	motile	1850.53	4034.36	0.344771	0.666666
Diploneis oblongella	motile	665.142	1529.72	0.388889	0.666666
Navicula longicephala	motile	280.644	413.978	0.5	0.666666
Nitzschia compressa var. vexans	motile	413.978	413.978	0.666666	0.666666
Stauroneis smithii	motile	3337.42	22150	0.291301	0.666665
Caloneis schumanniana var. biconstricta	motile	1768.06	3451.73	0.44389	0.665557
Nitzschia amphibioides	motile	1760.96	1760.96	0.665557	0.665557
Nitzschia sp. 1 ANS NAWQA EAM	motile	3733.26	3733.26	0.665557	0.665557
Surirella robusta	motile	1807.97	5080.42	0.249181	0.665557
Cymatopleura solea	motile	1978.3	5966.37	0.247357	0.662252
Navicula rhynchocephala	motile	1540.56	3544.36	0.330854	0.662252
Neidium dubium	motile	3609.99	8415.49	0.373827	0.662252
Navicula spp.	motile	6551.59	6551.59	0.630915	0.630915
Cymatopleura solea var. apiculata	motile	1265.34	2552.72	0.350492	0.6006
Stauroneis sp. 1 NEW MEXICO MORALES	motile	465.279	465.279	0.5	0.5
Nitzschia communis	motile	3146.93	9267.35	0.374448	0.5
Luticola cohnii	motile	642.83	810.604	0.388889	0.5
Navicula convergens	motile	310.484	310.484	0.5	0.5
Surirella tenera var. nervosa	motile	6884.71	9180.25	0.416667	0.5
Planothidium dubium	low profile	7288.76	12349.7	0.388889	0.5
Nitzschia homburgiensis	motile	1892.59	2441.64	0.416667	0.5
Navicula exigua var. capitata	motile	1211.1	1211.1	0.5	0.5
Navicula peregrina	motile	4804.59	16286.1	0.3	0.5
Nitzschia sp. 1 ?	motile	1017.89	1369.82	0.416667	0.5
Navicula subrhynchocephala	motile	6000.3	6000.3	0.5	0.5
Sellaphora sp. 1 ANS NAWQA LR	motile	3681.16	6339.13	0.332965	0.5
Pinnularia microstauron	motile	5789.52	6750.31	0.331137	0.498339
Amphora fogediana	low profile	7164.59	7164.59	0.488599	0.488599
Achnanthes cf. grischuna CLASON	low profile	1366.15	1366.15	0.441826	0.441826
Neidium bisulcatum	motile	2174.38	4141.76	0.335017	0.3367
Caloneis amphisbaena	motile	2969.82	8415.49	0.277792	0.33557
Cavinula pseudoscutiformis	motile	650.9	650.9	0.33557	0.33557
Nitzschia aequorea	motile	788.004	1191.66	0.328266	0.335008
Tryblionella debilis	motile	2851.16	11934.6	0.233005	0.334448
Stauroneis smithii var. incisa	motile	2101.2	4064.54	0.333061	0.334448
Surirella subsalsa	motile	137.85	137.85	0.334448	0.334448
Achnanthidium saprophilum	low profile	115.682	115.682	0.334448	0.334448
Surirella ovata var. salina	motile	1952.04	3756.78	0.333891	0.334448
Planothidium ellipticum	low profile	9887.54	11359.6	0.333611	0.33389
Navicula integra	motile	4281.4	8415.49	0.333333	0.333333
Nitzschia sublinearis	motile	408.81	670.31	0.25	0.333333
Nitzschia pellucida	motile	2027.65	5121.9	0.277778	0.333333
Nitzschia stagnorum	motile	55242.6	55242.6	0.333333	0.333333
Navicula libonensis	motile	5264.27	8415.49	0.25	0.333333
Planothidium daui	low profile	6207.85	8415.49	0.333333	0.333333
Planothidium hauckianum	low profile	8415.49	8415.49	0.333333	0.333333
Nitzschia elegantula	motile	12349.7	12349.7	0.333333	0.333333
Psammothidium lacus-vulcani	low profile	1802.54	1802.54	0.333333	0.333333
Navicula sp. 1 ?	motile	2147.28	4000.2	0.249448	0.333333
Caloneis ventricosa var. truncatula	motile	2564.97	4026.53	0.291667	0.333333
Nitzschia valdecostata	motile	186.693	186.693	0.333333	0.333333
Aneumastus minor	motile	1570.48	1570.48	0.333333	0.333333
Sellaphora laevissima	motile	2234.85	8656.23	0.278575	0.333333
Craticula citrus	motile	506.938	1017.99	0.305745	0.333333
Nitzschia thermaloides	motile	1135.82	1605.69	0.326156	0.333333
Neidium ampliatum	motile	2051.22	3245.14	0.279911	0.333333
Decussata placenta	motile	2325.12	2325.12	0.333333	0.333333
Surirella patella	motile	2325.12	2325.12	0.333333	0.333333
Psammodictyon constrictum	motile	3447.31	4212.84	0.249448	0.333333
Placoneis gastrum	motile	2932.83	4776.39	0.329533	0.333333
Nitzschia frequens	motile	4887.75	9180.25	0.222222	0.333333
Surirella suecica	motile	4900.02	9180.25	0.249723	0.333333
Nitzschia acicularioides	motile	1627.76	1627.76	0.333333	0.333333
Navicula sp. 1 ANS NEW JERSEY KCP	motile	2869.93	2869.93	0.333333	0.333333
Nitzschia brevissima	motile	3415.97	6624.95	0.333333	0.333333
Navicula helensis	motile	2189.05	2980.33	0.328718	0.333333
Nitzschia valdestriata	motile	1057.24	1057.24	0.333333	0.333333
Achnanthidium eutrophilum	low profile	734.04	734.04	0.333333	0.333333
Achnanthes exigua var. elliptica	low profile	2511.07	4318.13	0.247152	0.333333
Psammothidium lauenburgianum	low profile	1752.1	4026.53	0.257635	0.333333
Craticula minusculoides	motile	990.201	990.201	0.333333	0.333333
Navicula aboensis	motile	2352	2352	0.333333	0.333333
Pinnularia mesogongyla	motile	2352	2352	0.333333	0.333333
Achnanthidium altergracillima	low profile	1391.44	1391.44	0.333333	0.333333
Diploneis marginestriata	motile	579.374	1070.11	0.220343	0.333333
Sellaphora pupula var. capitata	motile	475.618	1080.53	0.296994	0.333333
Capartogramma crucicula	motile	454.762	753.506	0.222222	0.333333
Nitzschia obtusa var. scalpelliformis	motile	206.989	206.989	0.333333	0.333333
Karayevia suchlandtii	low profile	4009.81	4009.81	0.333333	0.333333
Achnanthes aff. lacus-vulcani NAR	low profile	286.028	373.912	0.332779	0.333333
Nitzschia biacrula	motile	1677.88	3342.56	0.277593	0.333333
Nitzschia lorenziana var. subtilis	motile	4367.38	4367.38	0.333333	0.333333
Tryblionella littoralis	motile	10450.5	19982.5	0.333333	0.333333
Diploneis elliptica	motile	7413.86	7413.86	0.333333	0.333333
Karayevia laterostrata	low profile	2136.34	2136.34	0.333333	0.333333
Stauroneis phoenicenteron	motile	282.988	282.988	0.333333	0.333333
Craticula accomodiformis	motile	241.252	262.984	0.249999	0.333333
Navicula aff. arvensis DW WHTRV 98/99	motile	140.497	140.497	0.333332	0.333332
Amphora subangularis	low profile	502.598	502.598	0.333332	0.333332
Hippodonta lueneburgensis	motile	694.232	694.232	0.332779	0.332779
Nitzschia acidoclinata	motile	9602.35	9602.35	0.332779	0.332779
Entomoneis paludosa	motile	2540.21	2540.21	0.332779	0.332779
Cavinula cocconeiformis	motile	1866.63	1866.63	0.332778	0.332778
Stauroneis obtusa	motile	806.116	806.116	0.332778	0.332778
Nitzschia sp. 0A UL NAWQA 96 KM	motile	3646.06	3646.06	0.332226	0.332226
Amphora coffeaeformis	low profile	1750.04	1750.04	0.332226	0.332226
Aneumastus tuscula	motile	198.144	198.144	0.332225	0.332225
Cocconeis disculus	low profile	198.144	198.144	0.332225	0.332225
Fallacia cryptolyra	motile	198.144	198.144	0.332225	0.332225
Achnanthes sp. 2 ?	low profile	4064.54	4064.54	0.331675	0.331675
Navicula perminuta	motile	4064.54	4064.54	0.331675	0.331675
Sellaphora pupula var. rectangularis	motile	4064.54	4064.54	0.331675	0.331675
Neidium binodeforme	motile	2745.5	4034.36	0.247262	0.331126
Placoneis clementioides	motile	588.713	588.713	0.331126	0.331126
Planothidium haynaldii	low profile	588.713	588.713	0.331126	0.331126
Eucocconeis flexella	low profile	392.086	392.086	0.331124	0.331124
Caloneis schumanniana	motile	933.494	1453.34	0.323244	0.330033
Nitzschia obtusa	motile	3794.05	3794.05	0.328407	0.328407
Gyrosigma exilis	motile	1340.32	2577.14	0.247268	0.327869
Surirella helvetica	motile	2577.14	2577.14	0.327869	0.327869
Navicula reichardtiana var. crassa	motile	5145.04	6370.64	0.324448	0.327869
Nitzschia incognita	motile	1995.67	2844.05	0.246861	0.327332
Navicula parabilis	motile	1147.29	1147.29	0.327332	0.327332
Nupela neglecta	motile	1147.29	1147.29	0.327332	0.327332
Navicula concentrica	motile	2658.28	4776.39	0.2462	0.325733
Nitzschia panduriformis var. continua	motile	896.003	896.003	0.325733	0.325733
Psammothidium chlidanos	low profile	512.423	896.003	0.244167	0.325733
Nitzschia sp. 5 ANS WRC	motile	3834.86	3834.86	0.324149	0.324149
Pinnularia biceps	motile	7351.76	13527.5	0.244364	0.322061
Caloneis tenuis	motile	6541.96	6541.96	0.32	0.32
Nitzschia sp. 8 ANS WRC	motile	756.112	756.112	0.318979	0.318979
Achnanthidium sp. 0B UL NAWQA KM	low profile	12308.1	12308.1	0.312012	0.312012
Caloneis spp.	motile	862.431	862.431	0.311526	0.311526
Nitzschia thermalis	motile	90.3782	90.3782	0.311042	0.311042
Nitzschia vermicularis	motile	923.203	1247.24	0.232884	0.300751
Pinnularia mesolepta	motile	4027.17	4027.17	0.294985	0.294985
Navicula medioconvexa	motile	1379.52	2738.4	0.289855	0.290275
Tryblionella umbilicata	motile	616.03	616.03	0.288184	0.288184
Surirella peisonis	motile	1000.87	1000.87	0.166667	0.166667
Pinnularia spp.	motile	4207.75	4207.75	0.166667	0.166667
Placoneis explanata	motile	4207.75	4207.75	0.166667	0.166667
Cymbellonitzschia diluviana	motile	7466.41	7466.41	0.166667	0.166667
Geissleria dolomitica	motile	670.31	670.31	0.166667	0.166667
Sellaphora sp. 1 ?	motile	1067.2	2113.04	0.166115	0.166667
Amphora aequalis	low profile	2000.1	2000.1	0.166667	0.166667
Nitzschia compressa var. balatonis	motile	2000.1	2000.1	0.166667	0.166667
Planothidium biporomum	low profile	1829.01	1829.01	0.166667	0.166667
Navicula sp. 4 ANS LLB	motile	3706.93	3706.93	0.166667	0.166667
Surirella sp. 1 ANS LLB	motile	3706.93	3706.93	0.166667	0.166667
Gyrosigma obscurum	motile	11934.6	11934.6	0.166667	0.166667
Achnanthes harveyi	low profile	5428.7	5428.7	0.166667	0.166667
Neidium apiculatum	motile	2488.87	2488.87	0.166667	0.166667
Pinnularia obscura	motile	2709.55	2709.55	0.166666	0.166666
Sellaphora rectangularis	motile	677.932	1252.37	0.166666	0.166666
Sellaphora bacillum	motile	5524.74	5524.74	0.166666	0.166666
Cocconeis fluviatilis	low profile	235.257	367.019	0.166666	0.166666
Navicula genovefae	motile	204.127	204.127	0.166666	0.166666
Amphora thumensis	low profile	109.759	109.759	0.166666	0.166666
Nitzschia sp. 1 ANS SAVANNAH EAM	motile	535.053	535.053	0.166666	0.166666
Adlafia bryophila	motile	1080	2004.9	0.166666	0.166666
Luticola ventricosa	motile	103.494	103.494	0.166666	0.166666
Navicula lundii	motile	933.312	933.312	0.166389	0.166389
Navicula sp. 2 ?	motile	619.792	619.792	0.166113	0.166113
Navicula constans var. symmetrica	motile	4328.11	4328.11	0.165837	0.165837
Navicula wildii	motile	4328.11	4328.11	0.165837	0.165837
Nitzschia commutata	motile	84.3276	84.3276	0.165837	0.165837
Amphora sp. 1 ?	low profile	2681.78	2681.78	0.165563	0.165563
Navicula trophicatrix	motile	2681.78	2681.78	0.165563	0.165563
Nitzschia alpina	motile	2681.78	2681.78	0.165563	0.165563
Psammothidium rossii	low profile	1486.9	1486.9	0.165289	0.165289
Gyrosigma obtusatum	motile	982.81	982.81	0.163399	0.163399
Nitzschia liebetruthii var. major	motile	128.843	128.843	0.162601	0.162601
Nitzschia silicula	motile	2084.63	2084.63	0.162601	0.162601
Navicula arvensis fo. major	motile	378.056	378.056	0.15949	0.15949
Nitzschia admissa	motile	378.056	378.056	0.15949	0.15949
Pinnularia sp. 1 ANS WRC	motile	378.056	378.056	0.15949	0.15949
Stauroneis agrestis	motile	623.345	623.345	0.158227	0.158227
Eucocconeis laevis	low profile	118.429	118.429	0.150602	0.150602

## Sheet: Distinct preference
Taxon Name	Guild	Mean cells/cm^2 (density)	Maximum cells/cm^2 (density)	Mean percent density (%)	Maximum percent density (%)
Achnanthes cf. obliqua MARR	low profile	221.844	221.844	0.66335	0.66335
Achnanthes cf. petersenii	low profile	913.187	913.187	0.297177	0.297177
Achnanthes exigua var. elliptica	low profile	2408.93	5206.42	0.388889	0.666667
Achnanthes inflata	acidophilous	228.415	228.415	0.165837	0.165837
Achnanthes lemmermannii	low profile	17140.3	17140.3	0.489396	0.489396
Achnanthes levanderi	low profile	1920.39	1920.39	1	1
Achnanthes minutissima var. jackii	low profile	6392.31	6392.31	2.08024	2.08024
Achnanthes oblongella	low profile	971.088	3298.08	0.311915	0.665557
Achnanthes ploenensis var. gessneri	low profile	1336.12	1336.12	0.165563	0.165563
Achnanthes reimeri	low profile	390.249	390.249	0.333331	0.333331
Achnanthes ricula	low profile	3252.46	4336.21	1.53676	1.60772
Achnanthes subhudsonis var. kraeuselii	low profile	39135.5	284132	4.58572	22.6821
Achnanthidium affine	low profile	6472.78	25194.4	0.685575	1.83333
Achnanthidium altergracillima	low profile	7873.73	7873.73	20.1667	20.1667
Achnanthidium deflexum	low profile	29041.8	317259	13.6588	69.8052
Achnanthidium eutrophilum	low profile	2973.68	2973.68	3.64842	3.64842
Achnanthidium exiguum	low profile	3293.6	27928.4	1.79326	14.1667
Achnanthidium microcephalum	low profile	195.124	195.124	0.166666	0.166666
Achnanthidium minutissimum	low profile	52590.3	2.10478e+06	16.7045	97.0443
Achnanthidium rivulare	low profile	48291.7	264315	11.312	55.3333
Amphora copulata	low profile	2047.16	12221.8	0.414784	1.49007
Amphora inariensis	low profile	17709.2	241384	3.35394	60.8624
Amphora montana	low profile	1749.48	7371.32	0.393651	1.22137
Amphora normanii	low profile	4978.29	4978.29	0.166666	0.166666
Amphora ovalis	low profile	5151.59	43280	0.950579	4.6589
Amphora pediculus	low profile	110637	2.27788e+06	9.55473	67.5
Amphora sp. 1 ANS WRC	low profile	2754.48	2754.48	0.333333	0.333333
Amphora veneta	low profile	3475.82	14941.3	3.1048	20.3333
Aulacoseira alpigena	acidophilous	18122.1	130189	1.90411	10.4235
Aulacoseira distans	acidophilous	2283.24	11841.6	0.736741	2.66667
Aulacoseira subarctica	acidophilous	3055.45	3055.45	0.165837	0.165837
Brachysira brebissonii	acidophilous	7655.57	17117.3	6.55556	17.5
Brachysira serians	acidophilous	269.377	828.344	0.659674	1.47783
Caloneis undulata	acidophilous	1108.37	1108.37	0.333333	0.333333
Chamaepinnularia soehrensis var. muscicola	acidophilous	46.5416	46.5416	0.328947	0.328947
Cocconeis disculus	low profile	698.407	698.407	0.166667	0.166667
Cocconeis fluviatilis	low profile	4363.07	17184.1	5.15343	17.6373
Cocconeis neodiminuta	low profile	3705.3	5744.55	0.748903	1.33333
Cocconeis neothumensis	low profile	875.696	937.938	0.5	0.666666
Cocconeis pediculus	low profile	14039.7	232283	2.46328	18.8333
Cocconeis placentula	low profile	7089.15	46756.7	2.00199	16.5
Cocconeis placentula var. euglypta	low profile	19561.5	240063	3.8387	36
Cocconeis placentula var. lineata	low profile	20326.6	228135	8.2072	94.0594
Cocconeis pseudolineata	low profile	2344.85	2344.85	1.66667	1.66667
Cyclotella meneghiniana	low profile	14262.3	234475	2.80395	56
Cymbella gracilis	acidophilous	1920.89	1920.89	0.299401	0.299401
Encyonopsis cesatii	low profile	7683.59	7683.59	1.1976	1.1976
Encyonopsis falaisensis	low profile	425.568	425.568	0.961536	0.961536
Encyonopsis microcephala	low profile	14226.1	146427	0.959798	7
Eucocconeis flexella	low profile	207.06	303.642	0.354943	0.657895
Eucocconeis laevis	low profile	1245.11	4122.6	0.704283	0.986842
Eunotia bilunaris	acidophilous	1134.09	12018.5	0.797234	7.16667
Eunotia bilunaris var. linearis	acidophilous	195.216	195.216	0.5	0.5
Eunotia bilunaris var. mucophila	acidophilous	652.088	652.088	0.666666	0.666666
Eunotia carolina	acidophilous	603.628	603.628	0.333333	0.333333
Eunotia exigua	acidophilous	718.296	3517.27	0.480284	2.5
Eunotia flexuosa	acidophilous	424.885	687.681	0.33278	0.333333
Eunotia formica	acidophilous	1463.89	6642.14	0.459697	1.66667
Eunotia implicata	acidophilous	4071.33	18139.4	2.61569	17.1429
Eunotia incisa	acidophilous	1965.43	14016.8	1.64612	8.47176
Eunotia minor	acidophilous	2255.26	8090.42	1.41667	4.83333
Eunotia monodon	acidophilous	3421.79	16219.6	1.60858	5.66667
Eunotia muscicola	acidophilous	278.98	278.98	0.166667	0.166667
Eunotia naegelii	acidophilous	1333.93	3740.6	1.62082	7.05882
Eunotia paludosa	acidophilous	110.922	110.922	0.331675	0.331675
Eunotia pectinalis	acidophilous	715.595	932.041	1.07739	1.49254
Eunotia pectinalis var. undulata	acidophilous	1285.47	13192.3	1.30742	5.61983
Eunotia perpusilla	acidophilous	872.62	1467.2	0.777778	1.5
Eunotia pirla	acidophilous	4737.2	9173.37	8.9888	17.3109
Eunotia polydentula	acidophilous	3067.55	3067.55	0.31746	0.31746
Eunotia praerupta	acidophilous	487.193	1587.21	0.330954	0.498339
Eunotia praerupta var. bidens	acidophilous	574.426	1059.79	1.91737	3.66667
Eunotia rhomboidea	acidophilous	1005.87	2062.08	0.568067	0.840336
Eunotia septentrionalis	acidophilous	53.8949	53.8949	0.333333	0.333333
Eunotia siolii	acidophilous	3392.73	5077.9	0.666667	1
Eunotia sp. 1 ?	acidophilous	9202.65	9202.65	0.952381	0.952381
Eunotia subarcuatoides	acidophilous	133.623	133.623	0.166667	0.166667
Eunotia tenella	acidophilous	3486.78	13416	1.66545	8
Fallacia indifferens	acidophilous	2071.87	4884.9	0.605844	0.998336
Fragilariforma constricta	acidophilous	3511.39	11995.4	1.41038	4.64345
Frustulia amphipleuroides	acidophilous	7566.97	26673.6	0.433333	1
Frustulia crassinervia	acidophilous	6635.44	67486.1	2.38648	14
Gomphonema parvulius	acidophilous	2615.41	16490.4	0.683629	3.32779
Karayevia clevei	low profile	6811.86	57270.7	0.818326	3.66667
Karayevia laterostrata	low profile	1355.44	3108.84	1.43735	3.81426
Karayevia ploenensis	low profile	3823.59	10335	1.72172	6.33333
Karayevia suchlandtii	low profile	1468.4	2881.34	0.307469	0.449101
Lemnicola hungarica	low profile	1052.37	7350.42	0.387601	2.48756
Navicula angusta	acidophilous	489.972	1498.4	0.62213	2.13465
Navicula difficillima	acidophilous	820.758	1458.64	0.548828	1.6129
Navicula gerloffii	acidophilous	433.743	433.743	0.321543	0.321543
Navicula hambergii	acidophilous	691.147	1585.12	0.388888	0.666666
Neidium alpinum	acidophilous	1517.49	3385.27	0.5	0.666667
Neidium hercynicum	acidophilous	36.1959	36.1959	0.333332	0.333332
Nitzschia paleaeformis	acidophilous	7066.54	7066.54	0.332226	0.332226
Nitzschia subtilis	acidophilous	5599.74	39994	0.486454	1.33111
Nupela lapidosa	acidophilous	5992.1	16327.6	1.34756	2.54491
Pinnularia acidophila	acidophilous	179.088	179.088	0.166666	0.166666
Pinnularia appendiculata	acidophilous	1901.68	3067.55	0.871032	1.66667
Pinnularia braunii	acidophilous	1562.98	1562.98	0.332779	0.332779
Pinnularia divergentissima	acidophilous	439.534	439.534	0.664452	0.664452
Pinnularia lundii	acidophilous	3602.06	13772.4	2.11111	9
Pinnularia nodosa	acidophilous	538.071	987.081	0.164162	0.168067
Pinnularia stomatophora	acidophilous	616.913	616.913	0.5	0.5
Pinnularia subcapitata	acidophilous	2127.31	15856.2	1.52471	11.3333
Pinnularia substomatophora	acidophilous	3067.55	3067.55	0.31746	0.31746
Pinnularia sudetica	acidophilous	707.199	707.199	0.165289	0.165289
Planothidium apiculatum	low profile	991.531	3385.27	0.932983	2.33333
Planothidium biporomum	low profile	14816.3	72372.1	3.66644	17.5
Planothidium daui	low profile	3106.67	6135.38	0.5	0.666666
Planothidium delicatulum	low profile	7295.64	32065.6	0.932892	2.33333
Planothidium dubium	low profile	417.764	534.493	0.666667	0.666667
Planothidium frequentissimum	low profile	5024.26	25789.1	1.35325	5.49085
Planothidium granum	low profile	1876.52	3533.27	0.249169	0.332226
Planothidium lanceolatum	low profile	12405.9	177018	2.51909	42.1667
Planothidium lanceolatum var. omissum	low profile	2603.21	2603.21	0.166666	0.166666
Planothidium minutissimum	low profile	1796.87	1796.87	0.5	0.5
Planothidium peragalli	low profile	1288.06	2062.11	0.221486	0.331126
Planothidium robustum	low profile	22853.7	22853.7	0.652528	0.652528
Planothidium rostratum	low profile	9178.6	75158.5	1.62495	8.16667
Planothidium stewartii	low profile	1640.74	4962.22	1.4934	6.12583
Platessa conspicua	low profile	16931.8	230600	1.93616	14.6667
Platessa hustedtii	low profile	2603.21	2603.21	0.166666	0.166666
Psammothidium bioretii	low profile	317.213	1538.49	0.423725	1.16086
Psammothidium chlidanos	low profile	21623.4	43176.2	2.16501	3.83333
Psammothidium grischunum fo. daonensis	low profile	836.94	836.94	0.5	0.5
Psammothidium helveticum	low profile	610.071	610.071	1.82421	1.82421
Psammothidium lacus-vulcani	low profile	11984.5	11984.5	1.16667	1.16667
Psammothidium lauenburgianum	low profile	26548	26548	2.5	2.5
Psammothidium marginulatum	acidophilous	1036.77	2255.16	0.444444	0.666666
Psammothidium scoticum	low profile	5631.68	5631.68	0.5	0.5
Psammothidium subatomoides	acidophilous	6665.94	83468.5	1.73682	18.0763
Psammothidium ventralis	acidophilous	4598.9	9161.61	0.499999	0.666667
Reimeria sinuata	low profile	21322.1	319389	3.26271	41.5
Reimeria sinuata fo. antiqua	low profile	8514.55	24891.5	0.388889	0.833333
Reimeria uniseriata	low profile	15277.3	15277.3	0.829187	0.829187
Rossithidium linearis	low profile	11759.9	44254.6	4.05868	14.5695
Rossithidium petersennii	low profile	69.8124	69.8124	0.493421	0.493421
Stauroneis anceps fo. gracilis	acidophilous	2098.02	4444.94	0.444444	0.833333
Stenopterobia curvula	acidophilous	163.021	163.021	0.166666	0.166666
Stenopterobia delicatissima	acidophilous	163.021	163.021	0.166666	0.166666
Stenopterobia densestriata	acidophilous	6760.65	6760.65	0.333333	0.333333
Tabellaria flocculosa	acidophilous	4080.61	37631.1	1.80424	18
Tabellaria flocculosa (strain IV) sensu Koppen	acidophilous	3298.08	3298.08	0.665557	0.665557

## Sheet: Facilitative
Taxon Name	Guild	Mean cells/cm^2 (density)	Maximum cells/cm^2 (density)	Mean percent density (%)	Maximum percent density (%)
Adlafia bryophila	motile	2457.91	5675.66	0.331156	0.665557
Aneumastus tuscula	motile	79.4453	79.4453	0.166389	0.166389
Anomoeoneis sphaerophora	motile	1415.12	1415.12	0.166113	0.166113
Bacillaria paradoxa	motile	2519.31	11818.9	0.248485	0.333333
Biremis circumtexta	motile	2662.7	4634.62	0.488613	0.666666
Brachysira microcephala	motile	220.559	220.559	0.166113	0.166113
Caloneis amphisbaena	motile	1457.33	1457.33	0.332779	0.332779
Caloneis bacillum	motile	5651.38	54315.3	0.846438	7.83333
Caloneis hyalina	motile	4261.82	14446.6	0.573581	1
Caloneis lewisii	motile	690.778	690.778	0.666666	0.666666
Caloneis schumanniana	motile	1257.44	1257.44	0.166666	0.166666
Caloneis schumanniana var. biconstricta	motile	1929.59	3664.88	0.554079	0.996678
Caloneis silicula	motile	8294.64	13903.9	1.03075	1.82724
Caloneis ventricosa var. alpina	motile	578.99	578.99	0.145138	0.145138
Caloneis ventricosa var. truncatula	motile	3912.72	11351.3	0.333333	0.333333
Cavinula cocconeiformis	motile	656.969	656.969	0.333333	0.333333
Chamaepinnularia gandrupii	motile	841.686	841.686	0.166666	0.166666
Craticula accomoda	motile	2323.89	2323.89	0.162074	0.162074
Craticula citrus	motile	450.332	450.332	0.31348	0.31348
Craticula cuspidata	motile	1028.52	2514.88	0.22213	0.333333
Craticula halophila	motile	1308.64	3070.99	0.3	0.333333
Craticula molestiformis	motile	4860.38	39506.2	0.82598	5.31561
Cymatopleura solea	motile	702.849	1980.26	0.286215	0.666667
Cymbellonitzschia diluviana	motile	1218.95	1218.95	2	2
Denticula elegans	N-fixer	19653.8	65391.2	0.721117	1.3267
Denticula kuetzingii	N-fixer	17568.4	155085	2.34479	16.8333
Denticula kuetzingii var. rumrichae	N-fixer	32135.5	71026.3	1.16317	3.09446
Denticula subtilis	N-fixer	2186	2186	0.499168	0.499168
Denticula tenuis	N-fixer	31081.9	31081.9	2	2
Diploneis modica	motile	34.9917	34.9917	0.164203	0.164203
Diploneis oblongella	motile	1215.3	3509.03	0.457502	0.830565
Diploneis parma	motile	10114.2	17713.6	2.5753	4.81728
Diploneis puella	motile	4486.15	20855.8	0.604504	1.39752
Diploneis subovalis	motile	2807.22	2807.22	0.664452	0.664452
Entomoneis alata	motile	3070.99	3070.99	0.333333	0.333333
Epithemia adnata	N-fixer	1563.17	7855.52	0.289652	0.998336
Epithemia sorex	N-fixer	42274.8	425480	5.49693	59
Epithemia turgida	N-fixer	5563.5	24435.3	1.28265	6.5
Epithemia turgida var. westermannii	N-fixer	1832.95	6983.13	0.843185	1.66667
Fallacia cryptolyra	motile	2160.84	2160.84	1	1
Fallacia lenzii	motile	3648.93	3648.93	1.15512	1.15512
Fallacia monoculata	motile	1100.22	1350.36	0.332872	0.5
Fallacia omissa	motile	4901.09	4901.09	3.83333	3.83333
Fallacia pygmaea	motile	1814.38	4647.79	0.38072	0.627943
Fallacia subhamulata	motile	1440.56	1440.56	0.666667	0.666667
Fallacia tenera	motile	1877.94	3054.07	0.498339	0.830565
Fistulifera pelliculosa	motile	6419.71	23637.8	0.287134	0.333333
Fistulifera saprophila	motile	12407.3	12407.3	9.66667	9.66667
Geissleria acceptata	motile	2555.4	7865.69	0.623961	1.4975
Geissleria decussis	motile	5011.8	29248.2	0.379819	1.33333
Geissleria schoenfeldii	motile	5180.32	5180.32	0.333333	0.333333
Gyrosigma acuminatum	motile	3905.44	17089.6	0.391863	0.666666
Gyrosigma attenuatum	motile	1340.34	2621.9	0.240042	0.313972
Gyrosigma reimeri	motile	3617.05	6505.43	0.582363	0.998336
Gyrosigma scalproides	motile	640.977	671.141	0.249723	0.333333
Gyrosigma spencerii	motile	566.137	677.182	0.25	0.333333
Hantzschia amphioxys	motile	1404.54	3563.87	1.15144	9.5
Hippodonta capitata	motile	2273.42	19378.3	0.488633	1.66667
Hippodonta hungarica	motile	3135.03	9905.86	0.556911	1.16279
Hippodonta lueneburgensis	motile	1110.89	2105.41	0.332364	0.498339
Luticola cohnii	motile	703.844	1306.11	0.25	0.333333
Luticola goeppertiana	motile	4002.76	10696	2.94234	8.33333
Luticola mutica	motile	1776.14	6287.2	0.571388	1.83333
Luticola ventricosa	motile	29.6179	29.6179	0.166666	0.166666
Mastogloia elliptica	motile	701.805	701.805	0.166113	0.166113
Mastogloia smithii	motile	52028.9	169135	11.8409	40.0332
Mastogloia smithii var. lacustris	motile	1403.61	1403.61	0.332226	0.332226
Mayamaea agrestis	motile	426.182	426.182	0.333333	0.333333
Mayamaea atomus	motile	3473.25	11160.8	0.71193	1.33333
Navicula antonii	motile	7510.27	59094.4	0.462868	1.16667
Navicula arvensis	motile	1907.78	3960.53	0.633552	1.33333
Navicula canalis	motile	2675.23	9269.25	0.393281	0.621118
Navicula canoris	motile	3260.19	3260.19	0.333333	0.333333
Navicula capitatoradiata	motile	18698.9	200921	1.84584	10.299
Navicula cari	motile	1913.63	2700.73	0.666667	1
Navicula caterva	motile	4850.22	8048.81	0.666666	1
Navicula cf. acceptata CODY	motile	5210.97	8098.04	0.386381	0.610687
Navicula cincta	motile	263.285	656.969	0.321226	0.333333
Navicula concentrica	motile	149.165	149.165	0.5	0.5
Navicula constans	motile	1980.26	1980.26	0.666667	0.666667
Navicula cryptocephala	motile	6568.83	45609.9	0.929654	5.66667
Navicula cryptotenella	motile	37556	614582	3.03157	12.6667
Navicula cryptotenelloides	motile	21091.5	41950.3	1.49529	2.65781
Navicula duerrenbergiana	motile	157806	315154	10.7221	21.118
Navicula erifuga	motile	72895	2.27284e+06	2.47916	29.313
Navicula exilis	motile	1252.36	3379.27	1.18523	3.74415
Navicula germainii	motile	5728.06	34122.9	1.46894	3.09951
Navicula gregaria	motile	3566.94	17089.6	0.715343	2.99501
Navicula gysingensis	motile	25.3249	25.3249	0.166389	0.166389
Navicula ingenua	motile	11902.9	35180.9	2.55556	7.16667
Navicula integra	motile	567.49	728.665	0.416528	0.666667
Navicula kotschyi	motile	1051.1	2168.48	0.372624	0.666667
Navicula lanceolata	motile	5797.27	77513.3	0.75266	2.66667
Navicula lateropunctata	motile	2830.24	2830.24	0.332226	0.332226
Navicula libonensis	motile	6344.85	11468.1	1.98129	3.63036
Navicula lundii	motile	23637.8	23637.8	0.318471	0.318471
Navicula medioconvexa	motile	4647.79	4647.79	0.324149	0.324149
Navicula menisculus	motile	3191.5	11160.8	0.383278	1.33333
Navicula meniscus	motile	2068.06	3127.66	0.578383	0.990099
Navicula minima	motile	8039.85	80997.8	1.75264	16.5
Navicula notha	motile	2475.33	2475.33	0.833333	0.833333
Navicula oblonga	motile	29.6179	29.6179	0.166666	0.166666
Navicula ochridana	motile	50.7878	50.7878	0.166667	0.166667
Navicula oppugnata	motile	701.805	701.805	0.166113	0.166113
Navicula parabilis	motile	441.117	441.117	0.332226	0.332226
Navicula radiosa	motile	2741.15	7923.63	0.374723	0.665557
Navicula radiosafallax	motile	22557	198091	1.56139	4.83333
Navicula recens	motile	8758.93	40961	2.29083	15.1667
Navicula reichardtiana	motile	7725.02	33912.1	1.02245	5.31561
Navicula riediana	motile	101.579	101.579	0.166667	0.166667
Navicula rostellata	motile	5507.56	47350.9	0.665447	3.16667
Navicula salinarum	motile	2743.09	2743.09	0.333333	0.333333
Navicula sanctaecrucis	motile	213.091	213.091	0.166667	0.166667
Navicula schroeteri	motile	1218.95	1218.95	2	2
Navicula schroeteri var. escambia	motile	14088.2	147922	2.15241	21.3333
Navicula secreta var. apiculata	motile	2604.5	9879.95	1.19335	3.66667
Navicula seminuloides	motile	5916.19	5916.19	2.16667	2.16667
Navicula sp. 0D UL NAWQA 96 KM	motile	69.9834	69.9834	0.328406	0.328406
Navicula sp. 0I UL NAWQA KM	motile	225.165	225.165	0.156739	0.156739
Navicula sp. 1 ?	motile	6545.28	6545.28	1.33333	1.33333
Navicula sp. 3 NAWQA MP	motile	5237.02	5237.02	0.665557	0.665557
Navicula sp. 47 NAWQA HAMSHER	motile	2186	2186	0.499168	0.499168
Navicula sp. 5 ANS WRC	motile	2323.89	2323.89	0.162074	0.162074
Navicula sp. 8 ANS WRC	motile	25562.9	25562.9	1.78282	1.78282
Navicula stroemii	motile	2016.95	2016.95	0.333333	0.333333
Navicula subminuscula	motile	21596.6	299783	2.80993	20.9076
Navicula submuralis	motile	5698.8	13861.9	2.44408	4.66667
Navicula symmetrica	motile	10310.3	47350.9	1.89123	5.33333
Navicula tantula	motile	1585.07	3355.71	0.666667	1.66667
Navicula tenelloides	motile	2161.5	8102.19	1.15859	3
Navicula tripunctata	motile	18476.2	247800	3.19328	28.5
Navicula trivialis	motile	5227.58	74189	1.92925	9.83333
Navicula veneta	motile	8058.31	46225.8	1.61738	8.16667
Navicula viridula	motile	2621.9	2621.9	0.166113	0.166113
Navicula viridulacalcis	motile	964.035	1830.53	0.478679	0.624025
Neidium affine	motile	1463.39	2085.1	0.413366	0.660066
Neidium ampliatum	motile	900.242	900.242	0.333333	0.333333
Neidium dubium	motile	578.99	578.99	0.145138	0.145138
Nitzschia acicularioides	motile	651.673	651.673	0.166666	0.166666
Nitzschia agnita	motile	2810.15	6758.55	0.924432	1.52905
Nitzschia alpina	motile	294.284	294.284	0.333333	0.333333
Nitzschia amphibia	motile	18641.4	282733	3.24303	27.5
Nitzschia amphibioides	motile	1583.48	2311.29	0.5	0.666667
Nitzschia angustata	motile	6873.19	26080.7	0.902139	2.443
Nitzschia angustatula	motile	242.481	426.182	0.323652	0.333333
Nitzschia archibaldii	motile	6700.81	36793.2	1.42256	6
Nitzschia aurariae	motile	12548.3	40551.3	1.27786	3.5503
Nitzschia bacillum	motile	13828.1	33708.6	1.16537	2.32945
Nitzschia bergii	motile	1449.08	2746.91	1.1317	1.95759
Nitzschia capitellata	motile	21461.1	116942	2.74639	15.5
Nitzschia clausii	motile	1002.42	1278.55	0.666667	1
Nitzschia communis	motile	1691.48	1691.48	0.333333	0.333333
Nitzschia desertorum	motile	824.733	1221.63	0.33278	0.333333
Nitzschia dissipata	motile	19198.1	460936	1.62889	7.98669
Nitzschia dissipata var. media	motile	4972.77	14074.5	1.80557	4.45545
Nitzschia dubia	motile	1457.33	1457.33	0.332779	0.332779
Nitzschia elegantula	motile	15171	24268.5	1.97901	3.5
Nitzschia filiformis	motile	1533.02	4874.7	0.266613	0.61162
Nitzschia fonticola	motile	13357.1	161320	2.33084	11.1667
Nitzschia fossilis	motile	9603.61	12038.8	1.33264	1.83333
Nitzschia frustulum	motile	13901.5	98265.5	2.57866	21.1667
Nitzschia gracilis	motile	1165.07	2514.88	0.512494	1.5674
Nitzschia heufleriana	motile	5212.51	38980.7	0.944049	5.16667
Nitzschia incognita	motile	4245.89	10137.8	0.88814	2.28385
Nitzschia inconspicua	motile	49412.1	1.05356e+06	6.84483	39.7083
Nitzschia intermedia	motile	8544.09	46699.1	1.28519	5.48173
Nitzschia kimberliensis	motile	89.0637	89.0637	0.332226	0.332226
Nitzschia lacuum	motile	48537.1	48537.1	7	7
Nitzschia liebethruthii	motile	490.7	1008.47	0.333148	0.5
Nitzschia linearis	motile	4422.16	9689.16	1.76858	5.48589
Nitzschia linearis var. tenuis	motile	1484.17	1484.17	0.333333	0.333333
Nitzschia lorenziana	motile	2503.74	4622.57	1.23645	1.80624
Nitzschia microcephala	motile	285010	1.68096e+06	4.24148	21.6794
Nitzschia nana	motile	1560.6	2105.41	1.0825	1.66667
Nitzschia palea	motile	15443.1	221343	2.12696	19.3787
Nitzschia palea var. debilis	motile	2734.62	9905.86	1.61108	4.33333
Nitzschia palea var. tenuirostris	motile	176.339	176.339	0.941915	0.941915
Nitzschia paleacea	motile	1710.38	5877.49	0.728081	1.66389
Nitzschia perminuta	motile	2281.95	6933.86	0.905382	2
Nitzschia pusilla	motile	2828.13	4647.79	0.245408	0.324149
Nitzschia recta	motile	7154.74	42724.1	0.827293	5.44555
Nitzschia reversa	motile	20884.4	125033	2.2114	10.9467
Nitzschia sigma	motile	2571.92	4622.57	0.415841	0.666666
Nitzschia sigmoidea	motile	2750.37	6435.86	0.999842	2.5
Nitzschia silicula	motile	1387.56	2514.88	0.332964	0.333333
Nitzschia siliqua	motile	3633.11	4954.93	0.666667	1
Nitzschia similis	motile	1452.6	1452.6	0.666667	0.666667
Nitzschia sinuata var. delognei	motile	5395.14	15847.3	0.582571	1.4975
Nitzschia sinuata var. tabellaria	motile	67686	224025	6.19917	27.8333
Nitzschia sociabilis	motile	2245.46	3379.27	0.990958	2.3511
Nitzschia solita	motile	7217.42	47350.9	0.583606	1.33333
Nitzschia sp. 0R UL NAWQA KM	motile	2085.1	2085.1	0.660066	0.660066
Nitzschia sp. 2 ANS LLB	motile	35513.2	35513.2	0.458015	0.458015
Nitzschia sp. 30 NAWQA EAM	motile	5114.18	5114.18	4	4
Nitzschia stagnorum	motile	726.299	726.299	0.333333	0.333333
Nitzschia subacicularis	motile	720.278	720.278	0.333333	0.333333
Nitzschia suchlandti	motile	4864.72	11160.8	0.443706	0.664452
Nitzschia supralitorea	motile	5719.87	14446.6	0.443797	0.998336
Nitzschia thermaloides	motile	31202.4	31202.4	4.5	4.5
Nitzschia tropica	motile	1008.47	1008.47	0.166667	0.166667
Nitzschia umbonata	motile	2616.46	5029.76	0.5	0.666666
Nitzschia valdestriata	motile	48.7707	48.7707	0.312011	0.312011
Nitzschia vermicularis	motile	2085.1	2085.1	0.660066	0.660066
Pinnularia borealis	motile	2440.51	5675.66	0.380873	1.16667
Pinnularia gibba	motile	4170.21	4170.21	1.32013	1.32013
Pinnularia microstauron	motile	1523.95	3664.88	0.519876	0.996678
Pinnularia viridis	motile	471.911	900.242	0.249999	0.333333
Placoneis clementioides	motile	2621.9	2621.9	0.166113	0.166113
Placoneis elginensis	motile	971.227	3477.42	0.232194	0.333333
Placoneis exigua	motile	151.251	151.251	0.30581	0.30581
Placoneis gastrum	motile	887.618	1419.82	1.16667	2
Placoneis neglecta	motile	7234.95	7923.63	0.499307	0.831947
Placoneis placentula	motile	29.6179	29.6179	0.166666	0.166666
Pleurosigma delicatulum	motile	2317.31	2317.31	0.155279	0.155279
Pleurosigma elongatum	motile	101.579	101.579	0.166667	0.166667
Pleurosigma salinarum	motile	5499.43	24268.5	1	3.5
Rhopalodia brebissonii	N-fixer	4231.98	10400.8	1.3287	5.83333
Rhopalodia gibba	N-fixer	8450.78	123518	1.76221	29.2359
Rhopalodia gibberula	N-fixer	1162.28	2323.89	0.248439	0.333333
Rhopalodia musculus	N-fixer	6545.28	6545.28	1.33333	1.33333
Sellaphora hustedtii	motile	14624.1	14624.1	0.5	0.5
Sellaphora laevissima	motile	1120.09	1309.25	0.221029	0.330032
Sellaphora mutata	motile	351.07	726.299	0.660213	1.33333
Sellaphora pupula	motile	9684.11	168400	1.42643	19.7674
Sellaphora pupula var. elliptica	motile	58.7796	58.7796	0.313972	0.313972
Sellaphora rectangularis	motile	1386.77	2743.09	0.333332	0.333333
Sellaphora seminulum	motile	3032.83	17999.5	0.665727	3.66667
Seminavis strigosa	motile	914.211	914.211	1.5	1.5
Simonsenia delognei	motile	2660.26	9245.15	1.0851	2.66876
Stauroneis anceps	motile	3612.04	3612.04	0.332778	0.332778
Stauroneis smithii	motile	2781.26	3477.42	0.492899	0.660066
Surirella angusta	motile	2068.72	11160.8	0.4953	2.64026
Surirella biseriata	motile	495.066	495.066	0.166667	0.166667
Surirella brebissonii	motile	7405.43	23675.4	0.787925	3
Surirella brebissonii var. kuetzingii	motile	387.101	1042.55	0.323483	0.330032
Surirella minuta	motile	3349.66	27902	0.490612	1.25589
Surirella ovalis	motile	1973.51	7425.87	2	7.16667
Surirella splendida	motile	58.7796	58.7796	0.313972	0.313972
Surirella spp.	motile	58.7796	58.7796	0.313972	0.313972
Tryblionella apiculata	motile	2222.14	12574.4	0.542839	1.66667
Tryblionella calida	motile	3175.84	18861.6	0.7182	2.5
Tryblionella compressa	motile	3054.07	3054.07	0.830565	0.830565
Tryblionella hungarica	motile	1223.9	2514.88	0.473572	1.16667
Tryblionella levidensis	motile	59.2358	59.2358	0.333333	0.333333
Tryblionella victoriae	motile	693.969	1042.55	0.331683	0.333333
