# Supplementary material for: Framework for community functioning: synthesis of stress gradient and resource partitioning concepts
Source: PeerJ. 2017 Oct 2;5:e3885. doi: 10.7717/peerj.3885 (PMC5628606; doi:10.7717/peerj.3885)
Supplement: Supplemental Information 2 — Spatial, environmental, and biotic data for samples in groups where the shared preference (Table 1), the distinct preference (Table 2), and the facilitative mode (Table 3) were tested. For each sample, the sample ID, station ID, study unit, and time of collection are also provided. [file peerj-05-3885-s002.xlsx]

## Sheet: Shared preference mode
Sample ID	Station ID	Study Unit	Collection date	Latitude (degrees)	Longitude (degrees)	Projected latitude (km x 100)	Projected longitude (km x 100)	pH	NO2+NO3 (mg/L)	PO4 (mg/L)	Water temperature (°C)	Dissolved oxygen (mg/L)	Specific conductance (µS/cm)	Elevation (m)	Low profile guild richness	Motile guild richness	Low profile guild density (cells/cm^2)	Motile guild density (cells/cm^2)
BDB-000026597	04085455	WMIC	2004-08-25	43.9136	-87.8087	23.5285	6.54649	7.9025	2.086	0.1165	19.1375	9.5025	607	222	11	32	259625	218864
BDB-000026665	10129500	GRSL	2000-08-20	40.7927	-111.405	20.7998	-12.8361	8.11	0.079	0.037	10.2	8.355	359	1796	11	9	369836	186965
BDB-000027047	05453100	EIWA	1996-08-27	41.8127	-92.0648	20.9662	3.24519	8.05861	6.0512	0.119686	13.4167	9.54722	516.167	222	5	23	64227.6	341209
BDB-000027051	05564300	LIRB	1997-08-13	40.6795	-88.9406	19.85	5.912	8.6	0.05	0.023	22.5	12.1	613	208	6	28	73436	257026
BDB-000028534	09066510	UCOL	1996-08-07	39.6094	-106.448	18.9197	-8.87166	8.4417	0.570051	0.0755918	4.81026	10.3	271.35	2360	7	11	137981	70128.8
BDB-000028537	09149480	UCOL	1996-08-08	38.6458	-108.049	18.0092	-10.361	8.26872	3.55957	0.0237045	10.0941	10.1102	1028.84	1594	7	24	37441.6	142194
BDB-000028542	09070500	UCOL	1996-08-12	39.6439	-107.078	19.0186	-9.39979	8.13382	0.12525	0.0125227	9.02353	9.73636	372.627	1854	5	14	17859	33288.2
BDB-000029025	09152500	UCOL	1997-08-11	38.9833	-108.451	18.4288	-10.6551	8.30615	0.648867	0.0152222	12.179	9.22576	660.379	1412	4	10	42814.1	141071
BDB-000030416	08171000	SCTX	1998-08-01	29.9944	-98.0889	7.70932	-2.01335	7.97692	0.339885	0.0116154	22.3308	9.212	480.615	253	6	8	8821.98	27250.1
BDB-000030417	08167500	SCTX	1998-08-02	29.8605	-98.3836	7.56751	-2.30109	8.05217	0.677087	0.0106087	22	8.1987	489.957	292	8	11	47437.1	17448.1
BDB-000031025	340552117172701	SOCA	2000-08-14	34.0978	-117.291	14.4336	-19.3356	9.2	1.01	0.031	36.5	11	542	306	1	2	1.36321e+06	34954.2
BDB-000031507	14173500	WILL	1994-08-03	44.6207	-123.129	27.0799	-21.1928	7.32	0.7525	0.0325	16.1775	9.4275	108.9	59	5	13	300210	497295
BDB-000031536	05066500	REDN	1994-08-05	47.4094	-97.0612	27.1335	-0.805786	8.15	0.205	0.155	17.75	10.25	1023	275	7	27	59609.6	178829
BDB-000031913	06797500	CNBR	1993-08-22	42.2685	-98.3394	21.4324	-1.917	8.2	0.7	0.051	27.1	8.21	293	561	3	22	1890.28	224943
BDB-000032460	374752105300801	RIOG	1995-08-01	37.7978	-105.503	16.8151	-8.27472	7.75833	0.0599394	0.0102941	5.16389	9.34722	81.375	2587	5	10	34710.4	3670.28
BDB-000032461	08276500	RIOG	1995-08-22	36.32	-105.754	15.1902	-8.66276	8.26286	0.164813	0.0215625	12.4143	8.92571	299.176	1851	8	14	400872	579678
BDB-000032463	06187915	YELL	2000-08-22	45.003	-110.002	25.2706	-10.9855	8.07811	0.0741944	0.0239444	4.00417	10.946	185.865	2257	3	15	9060.98	30114.4
BDB-000032614	05458870	EIWA	1997-08-24	42.6961	-92.908	21.9277	2.518	8.07333	6.676	0.0226667	18.4	9.66667	609	291	8	23	325106	784209
BDB-000032615	05459300	EIWA	1997-08-25	43.2469	-93.438	22.53	2.06991	8.2	6.682	0.042	22.45	11.35	645.5	359	10	19	89647.6	89057.8
BDB-000032616	05449200	EIWA	1997-08-25	42.8633	-93.6133	22.098	1.93909	8.04	5.8475	0.024	20.35	7.8	653.5	354	9	20	55298.8	184329
BDB-000032617	05457950	EIWA	1997-08-26	43.1986	-92.6874	22.4948	2.67798	8.025	7.367	0.0245	20.95	9.4	502	326	8	22	458544	1.26844e+06
BDB-000032618	05463510	EIWA	1997-08-19	42.4567	-92.4227	21.6742	2.92309	7.94	8.825	0.066	19.2	8.75	554	262	7	28	29883.4	100857
BDB-000032619	05455500	EIWA	1997-08-10	41.4697	-91.7146	20.5952	3.55108	7.79	4.755	0.1295	21.05	7.75	454.5	194	6	29	20863.3	116574
BDB-000032620	05421700	EIWA	1997-08-13	42.1422	-91.3457	21.3611	3.81969	8.26	7.3995	0.0205	22.15	10.2	502	243	4	17	76086.6	557572
BDB-000032892	11303000	SANJ	1995-08-15	37.7297	-121.11	19.2041	-21.6679	7.3963	0.295308	0.0569231	15.35	9.62083	91.15	16	8	34	266227	1.51474e+06
BDB-000032895	11290000	SANJ	1995-08-28	37.6269	-120.988	19.065	-21.5945	7.46667	0.607273	0.0893939	15.8875	9.80968	155.959	21	6	21	118543	415714
BDB-000033281	404609111345901	GRSL	2000-08-13	40.7692	-111.583	20.798	-12.9875	8.5	0.76	0.161	13.65	13.45	1465	1953	8	9	836970	455984
BDB-000033282	10128500	GRSL	2000-08-23	40.7372	-111.248	20.7173	-12.7164	8.41	0.0645	0.01	8.55	11.05	292.5	2029	7	6	144532	16259.9
BDB-000033283	404707111094301	GRSL	2000-08-23	40.7853	-111.162	20.759	-12.6367	8.42	0.0595	0.01	9.25	9.35	225.5	2167	5	5	86867.4	10048.9
BDB-000033284	404502111220801	GRSL	2000-08-14	40.7506	-111.369	20.7483	-12.8139	8.445	0.075	0.012	12.6	10.5	378	1850	10	10	686101	762650
BDB-000033855	05473060	EIWA	1997-08-11	41.1586	-91.7085	20.2475	3.57186	7.79	6.887	0.185	21.05	6.25	608.5	181	4	35	2248.52	20236.7
BDB-000033856	05473400	EIWA	1997-08-12	40.9253	-91.6742	19.9879	3.61226	8.375	4.274	0.048	21.45	10.2	532.667	174	8	29	12000.6	50296.5
BDB-000033860	05473550	EIWA	1997-08-12	40.8606	-91.4804	19.923	3.77741	7.9	5.4145	0.167	22	6.2	914	167	5	33	91236	637497
BDB-000033862	05465310	EIWA	1997-08-11	41.2267	-91.2757	20.3407	3.92801	7.99	6.8515	0.0565	21.05	9	496	176	4	26	39979.5	212864
BDB-000034086	11390890	SACR	1996-08-01	38.8124	-121.774	20.5265	-21.9015	7.99143	0.477414	0.099069	17.0812	8.10645	589.543	8	4	26	59310.9	2.05364e+06
BDB-000034241	401442111402201	GRSL	2000-08-01	40.245	-111.673	20.2311	-13.158	8.35	0.2995	0.017	10.45	11.3	409.5	1397	6	4	1.04601e+06	107862
BDB-000034242	401850111392201	GRSL	2000-08-02	40.3139	-111.656	20.3049	-13.1314	8.25	0.1875	0.012	9.05	10.4	368	1473	6	8	537966	151130
BDB-000034243	401653111400301	GRSL	2000-08-01	40.2814	-111.668	20.2706	-13.1469	8.3	0.2005	0.0145	9.3	11.2	357	1431	5	8	653432	238369
BDB-000034245	400927111354501	GRSL	2000-07-31	40.1575	-111.596	20.1238	-13.11	7.95	2.0035	0.01	10.25	10	500.5	1411	9	8	178715	24370.2
BDB-000034486	01094161	NECB	2000-08-30	42.7933	-71.4706	24.556	19.7303	7.2	0.2145	0.0115	15.15	9.75	236.5	34	5	3	25760.4	1037.64
BDB-000034780	414258111502001	GRSL	2000-08-06	41.7161	-111.839	21.8786	-13.0229	8.05	0.146	0.0115	9.75	10.555	383	1375	7	7	521475	736200
BDB-000034784	411407111580501	GRSL	2000-08-06	41.2353	-111.968	21.3658	-13.2181	8.06667	0.2385	0.01	12.5333	9.51	415	1311	9	8	784400	672343
BDB-000034976	01471520	DELR	2000-08-30	40.3281	-75.9444	21.0129	16.7693	7.9625	2.6875	0.0155	16.975	9.06667	460	74	7	9	230470	248313
BDB-000035279	411413111564101	GRSL	2000-08-08	41.2369	-111.945	21.3644	-13.1986	8.4	0.0825	0.01	11.9	10.285	566	1326	10	5	403720	106743
BDB-000035280	411413111554601	GRSL	2000-08-08	41.2369	-111.929	21.3623	-13.1861	8.5	0.0695	0.01	14.1333	9.92333	581.333	1343	9	6	511752	91882.7
BDB-000035300	404847111240501	GRSL	2000-08-16	40.8131	-111.401	20.8218	-12.8295	8.7	2.521	0.2245	8.6	10.6	1147.5	1780	3	5	139932	14910.8
BDB-000035302	404431111282901	GRSL	2000-08-15	40.7419	-111.475	20.7531	-12.9029	7.7	9.362	1.3545	15	9.435	1496	1969	7	11	3.0337e+06	3.17816e+06
BDB-000035337	01476470	DELR	2000-08-15	39.9325	-75.4117	20.6752	17.3031	7.7275	1.8585	0.0745	19.15	8.6875	233.25	39	9	14	139944	70560.1
BDB-000035349	01472280	DELR	2000-08-28	40.3395	-75.4718	21.1097	17.1556	8.09333	0.829	0.033	17.8333	9.78667	283	66	6	7	465772	2.0251e+06
BDB-000035492	01462100	DELR	2000-08-21	40.3296	-74.9368	21.1966	17.5979	7.575	0.5455	0.041	20.4167	7.70833	241.167	14	6	8	1.277e+06	417712
BDB-000035498	01480350	DELR	2000-08-23	40.0395	-75.8283	20.7173	16.9331	7.62333	3.994	0.0645	17.2767	9.16	244.667	164	4	6	298579	249720
BDB-000035598	12108500	PUGT	1998-08-25	47.2757	-122.06	29.6827	-19.5809	7.95135	2.12239	0.142444	9.78919	11.3162	146.324	68	5	4	29936.4	590.294
BDB-000035832	404055111320301	GRSL	2000-08-21	40.6819	-111.534	20.6949	-12.963	8.2	0.18	0.0105	9.05	11.7	2910	2029	7	18	994298	355577
BDB-000035834	403938111300201	GRSL	2000-08-21	40.6606	-111.501	20.6667	-12.9391	7.65	0.28	0.013	8.05	9.26	4460	2073	4	6	428995	177249
BDB-000035836	403818111154201	GRSL	2000-08-20	40.6383	-111.262	20.6099	-12.7454	8.6	0.224	0.0115	13.05	10.96	379.5	2019	6	14	362733	184605
BDB-000035991	05469980	EIWA	1997-08-17	42.1372	-93.5674	21.2875	1.99709	8.23	8.3755	0.0895	19.45	10.35	683	287	8	26	14328.1	39258.9
BDB-000035995	05420720	EIWA	1997-08-27	42.8475	-92.2302	22.1167	3.06299	7.755	6.0585	0.017	20.65	7.75	552	304	9	29	80410.7	483740
BDB-000035996	05420900	EIWA	1997-08-19	42.5408	-92.0252	21.7811	3.24379	8.025	6.6145	0.0205	19.85	9.65	486	280	6	23	212557	720421
BDB-000035997	05471120	EIWA	1997-08-17	41.9522	-93.406	21.0841	2.1352	8.05	6.965	0.033	20.05	9.25	591.5	272	7	18	33712.2	61840.1
BDB-000036230	394629105063101	SPLT	2003-08-20	39.7747	-105.109	18.987	-7.72051	8.1	0.479	0.15	17.7	8.59	261.5	1632	4	28	43019.8	195932
BDB-000036276	14202000	WILL	1995-08-09	45.2332	-122.75	27.6508	-20.7154	7.1515	1.8827	0.0725	12.3395	9.59026	108.293	26	8	26	462942	428003
BDB-000036926	403559099112201	CNBR	2003-08-04	40.5832	-99.1899	19.5674	-2.67703	7.69	3.8915	0.6545	24.28	6.045	793	667	2	25	8557.6	488639
BDB-000036939	403948099160201	CNBR	2003-08-04	40.6632	-99.2675	19.6592	-2.73901	8.255	2.593	0.239	26.2	9.175	943.5	672	10	30	64349.9	235533
BDB-000036990	01639462	PODL	1994-08-15	39.6315	-77.0769	20.0534	15.9897	7.6	4.1	0.02	19.5	8.7	211	153	6	19	1.55234e+06	649622
BDB-000036991	01639440	PODL	1994-08-15	39.6773	-77.0933	20.101	15.9659	7.6	3.1	0.01	19	9.2	236	147	13	26	119969	102541
BDB-000037001	01656920	PODL	1994-08-24	38.8676	-77.4639	19.1491	15.8329	7.3	1.4	0.03	18.5	8.1	264	68	6	16	115592	1.63216e+06
BDB-000037252	01571000	LSUS	1993-08-01	40.3084	-76.8497	20.835	16.0273	8.3	1	0.01	22.1	8.5	401	112	8	13	623197	303470
BDB-000037258	01540500	LSUS	1993-08-12	40.9581	-76.6191	21.5868	16.0702	8.39	0.62	0.01	21.75	9.9	374.5	128	10	10	317227	24865.7
BDB-000037261	01567000	LSUS	1993-08-22	40.4784	-77.1291	20.9749	15.759	7.85	1.5	0.03	21.95	7.1	234.5	113	13	8	140832	12802.9
BDB-000037276	01573560	LSUS	1994-08-15	40.2984	-76.6677	20.8549	16.1798	7.65	2.8	0.08	20.55	7	265	99	10	15	33681	12043.5
BDB-000037278	395048076011401	LSUS	1994-08-29	39.8468	-76.0202	20.4721	16.8194	8.35	6.5	0.08	24.1	9.35	261	92	13	20	10647.6	37166.2
BDB-000037350	01333500	HDSN	1993-08-02	42.764	-73.3373	24.151	18.2663	7.8725	0.38	0.01	16.7557	9.60833	171.514	176	10	6	458960	22030.1
BDB-000037351	01333300	HDSN	1993-08-02	42.7412	-73.2126	24.1503	18.3709	8.13	0.42	0.02	18.3817	10.296	290.667	174	7	7	530760	871397
BDB-000037352	0136216850	HDSN	1993-08-03	42.012	-73.7432	23.2559	18.1403	7.9825	0.85	0.01	17.8112	9.73167	323.125	86	8	4	291206	23111.6
BDB-000037356	0136230005	HDSN	1993-08-08	42.0815	-74.3313	23.2208	17.6519	6.9025	0.124667	0.01	18.1257	9.045	41.5571	255	6	2	133950	6318.4
BDB-000037359	01374960	HDSN	1993-08-10	41.2845	-73.774	22.4581	18.3043	7.54667	0.366667	0.0133333	14.95	9.1625	363.2	115	11	19	133756	52808.4
BDB-000037361	01374300	HDSN	1993-08-11	41.3179	-73.9054	22.4692	18.1895	7.6225	0.44	0.01	16.9843	9.76	220.125	9	10	13	653903	689162
BDB-000037365	01351200	HDSN	1993-08-16	42.6787	-74.254	23.8855	17.5622	7.938	0.2305	0.01	19.075	9.05714	350.571	286	15	17	133542	59530.9
BDB-000037366	01359900	HDSN	1993-08-18	42.5384	-73.8276	23.8125	17.9367	7.7575	1.29	0.0166667	15.8257	9.76333	738.286	38	7	6	954575	147455
BDB-000037367	01372200	HDSN	1993-08-18	41.8154	-73.7635	23.038	18.1751	8.09	0.416667	0.01	17.7614	10.288	320.714	75	14	18	261746	56356.7
BDB-000037501	01348040	HDSN	1993-08-08	42.9987	-74.6996	24.1526	17.129	8.02	0.793333	0.01	15.92	9.87333	233.686	97	8	6	1.15019e+06	107739
BDB-000037502	01643820	PODL	1994-08-25	39.0432	-77.7667	19.2922	15.5399	7	0.55	0.02	17.5	8.7	171	103	6	17	8.39485e+06	3.07885e+06
BDB-000037503	01638994	PODL	1994-08-28	39.7304	-77.1539	20.1492	15.9037	8.1	2.7	0.26	22	9.1	399	146	9	20	136917	568733
BDB-000037504	01638920	PODL	1994-08-28	39.7815	-77.1953	20.1984	15.858	8.3	0.93	0.06	22	10.5	247	134	5	7	82817.2	504432
BDB-000037505	01638740	PODL	1994-08-29	39.8637	-77.2894	20.2731	15.7616	8.3	1.4	0.05	22	12.3	296	165	8	19	1.6849e+06	1.31754e+07
BDB-000037506	01639380	PODL	1994-08-29	39.7082	-77.3217	20.0968	15.7688	7.5	0.36	0.07	18.5	9.5	223	119	5	15	3.62301e+06	2.83152e+07
BDB-000037507	01638895	PODL	1994-08-29	39.802	-77.1786	20.2238	15.8673	7.9	1.8	0.37	21.5	9.5	420	145	8	15	187183	798872
BDB-000037510	01643615	PODL	1994-08-14	39.1229	-77.4808	19.427	15.7632	7.6	2.8	0.24	20	8.7	173	63	9	17	177885	454819
BDB-000037513	01647720	PODL	1994-08-15	39.1165	-77.1022	19.4834	16.0826	7.2	1.5	0.01	17.5	9.8	140	99	4	18	1.45749e+06	311373
BDB-000037516	01652370	PODL	1994-08-24	38.8679	-77.1275	19.206	16.1164	7.3	1.8	0.02	20	9.1	359	58	5	9	306347	695663
BDB-000037517	01637950	PODL	1994-08-25	39.3668	-77.5864	19.6778	15.6218	7.4	4.3	0.1	20.5	8.2	257	101	6	15	335563	2.84687e+06
BDB-000037518	01657435	PODL	1994-08-23	38.7359	-77.3639	19.0211	15.9459	7	0.32	0.01	20	8.6	111	53	6	8	664905	35132
BDB-000037523	01644481	PODL	1994-08-30	39.2012	-77.2041	19.5593	15.9784	7.3	3.4	0.12	19	10	168	112	7	22	1.47068e+06	740340
BDB-000037524	01643300	PODL	1994-08-30	39.3087	-77.2983	19.6617	15.8758	7.2	2.9	0.02	18	8.6	128	116	7	6	2.98141e+06	166913
BDB-000037857	01346865	HDSN	1993-08-09	42.9776	-74.819	24.1081	17.0398	8.164	0.463333	0.0133333	17.1637	10.0217	396	159	7	6	1.46278e+06	287760
BDB-000037859	01348020	HDSN	1993-08-10	43.0051	-74.7293	24.1542	17.104	7.925	0.236667	0.0133333	17.0643	9.8	226.571	102	15	6	918049	24159.2
BDB-000037861	0134273950	HDSN	1993-08-11	42.9695	-74.9596	24.0742	16.9306	8.045	0.41	0.01	16.4486	9.684	458.143	218	7	13	950257	591148
BDB-000037863	01351270	HDSN	1993-08-12	42.6681	-74.5215	23.8248	17.3526	7.94	0.16	0.0133333	19.0357	8.86667	322.143	296	7	9	501511	58850.8
BDB-000038000	01376500	HDSN	1995-08-27	40.9373	-73.889	22.0577	18.3009	7.77435	0.880833	0.0391667	15.6628	8.9084	587.375	34	8	13	700624	2.28821e+06
BDB-000038092	07369500	MISE	1998-08-24	32.4321	-91.3668	10.5046	4.33209	7.02544	0.797391	0.0889687	18.1961	6.39139	264.868	18	1	20	70303	203879
BDB-000038112	09146200	UCOL	1998-08-04	38.1839	-107.746	17.4628	-10.1656	7.99848	0.129923	0.0103077	9.66949	9.27271	535.062	2104	4	8	4429.03	733.01
BDB-000038124	05422000	EIWA	1996-08-20	41.767	-90.5349	20.9774	4.5086	8.08865	5.73153	0.0566667	13.6378	10.54	404.622	185	5	24	23809.4	51353.6
BDB-000038127	05464020	EIWA	1996-08-06	42.4158	-92.2188	21.635	3.09142	8.3	4.77858	0.0859167	10.9077	11.8462	545.231	244	9	13	260055	454440
BDB-000038129	05465000	EIWA	1996-07-31	41.4092	-91.2904	20.5442	3.90565	8.462	3.83589	0.0866667	16.27	9.66	497.5	177	3	16	73710.8	108109
BDB-000038237	09128000	UCOL	1998-08-05	38.5292	-107.649	17.8366	-10.0348	8.05081	0.060863	0.0121757	7.44676	9.90797	183.359	2078	6	15	90450.2	176910
BDB-000038239	09112200	UCOL	1998-08-05	38.7842	-106.871	18.0411	-9.33494	8.29686	0.104812	0.00944554	6.42864	9.39218	253.155	2577	8	9	54477.5	2013.3
BDB-000038751	01470779	DELR	2001-08-12	40.4134	-76.1716	21.0665	16.5623	8.13889	8.06117	0.0569267	13.1397	10.9095	560.492	96	7	4	312298	13336.6
BDB-000038763	01438399	DELR	2001-08-28	41.3131	-74.7786	22.3	17.484	8.16667	0.1265	0.016	17.38	9.37	411.667	150	8	5	50307.4	3854.2
BDB-000039316	13349410	CCYK	1993-08-29	47.2043	-117.525	28.7511	-16.2559	8.28929	2.45571	0.0721429	11.2893	11.0596	288.179	614	6	14	2.01065e+06	1.09052e+06
BDB-000039317	464539117133000	CCYK	1993-08-30	46.7607	-117.226	28.2216	-16.1429	8.31111	7.7	2.38	22.5556	6.94444	618	701	9	11	714801	2.56079e+06
BDB-000039335	13349200	CCYK	1995-08-07	46.8766	-117.364	28.3701	-16.2171	8.55	4.94511	1.11156	11.485	11.262	458	610	6	8	56994.5	247570
BDB-000039437	01440304	DELR	2001-08-29	41.1637	-75.2396	22.0529	17.1466	7.11333	0.2555	0.0115	13.83	10.32	81.8667	260	4	1	359689	605.535
BDB-000039439	01438302	DELR	2001-08-28	41.3223	-74.7952	22.3071	17.4683	7.26667	1.555	0.014	13.64	11.97	149.333	117	2	1	342110	572.089
BDB-000039646	05317828	UMIS	1997-08-19	43.6105	-94.0875	22.9235	1.5371	8.07	6.376	0.043	19.24	8.9	645	326	6	24	138794	194021
BDB-000039674	13350700	CCYK	1993-08-16	46.8615	-117.894	28.4455	-16.6162	8.53333	0.75	0.126667	17.1	7.03333	409	441	8	17	237279	349295
BDB-000039675	13346990	CCYK	1993-08-17	46.721	-117.137	28.1637	-16.0861	7.96667	7.06667	2.8	14.8333	7.5	689.667	750	6	12	302357	231112
BDB-000039929	07014300	OZRK	1994-08-22	38.0289	-91.2135	16.7649	4.1601	8.14	0.0655	0.01	19.2	10	352.5	195	5	3	246696	31397.7
BDB-000039930	07018100	OZRK	1994-08-23	38.1595	-90.7062	16.9344	4.59236	8.24	0.0866667	0.0133333	19.4	8.83333	423.333	162	8	10	172694	266549
BDB-000039948	07067000	OZRK	1995-08-20	36.9914	-91.0148	15.6127	4.39353	8.13136	0.253364	0.0124091	13.7227	10.7591	282.091	139	12	7	119538	7918.95
BDB-000039950	06923150	OZRK	1995-08-22	37.5945	-92.9668	16.2155	2.6524	8.06098	0.398451	0.0194118	15.9157	10.6041	276.392	312	11	11	159374	51086.9
BDB-000039952	07186480	OZRK	1995-08-28	37.1556	-94.603	15.6904	1.22902	7.9931	3.21724	0.0524138	15.4414	10.6138	347.345	251	3	5	132304	5.42446e+06
BDB-000039953	07050500	OZRK	1995-08-29	36.426	-93.6232	14.8904	2.11132	7.9784	0.401903	0.189355	16.912	9.22816	239.687	298	9	16	156969	145676
BDB-000040034	05320450	UMIS	1997-08-18	43.935	-94.0711	23.2856	1.54293	8.08	2.618	0.073	18.65	8.18	657	296	3	31	36244.5	658443
BDB-000040035	05319360	UMIS	1997-08-18	43.9961	-94.2775	23.3506	1.37662	8.37	7.599	0.05	18.98	12.92	758	289	5	28	95573.1	742946
BDB-000040039	05320080	UMIS	1997-08-17	44.0272	-93.5466	23.3981	1.95969	8.08	10.45	0.09	17.32	8.95	714	327	11	21	315970	136421
BDB-000040042	05316985	UMIS	1997-08-12	44.2758	-94.9064	23.655	0.870441	8.03	10.07	0.044	22.3	10.51	1056	310	7	19	299700	891907
BDB-000040044	05312000	UMIS	1997-08-11	44.7105	-95.7881	24.1345	0.167595	8.02	0.968	0.128	22.18	11.74	1753	320	3	21	95172.4	685539
BDB-000040277	05554000	LIRB	1997-08-14	40.8356	-88.2989	20.066	6.43412	8.2	0.11	0.016	23.1	7.6	619	199	4	39	4743.37	235875
BDB-000040280	05554490	LIRB	1997-08-10	40.8306	-88.5748	20.0421	6.20457	8.2	0.078	0.018	23	7.2	626	193	7	28	3569.94	20380.3
BDB-000040281	05556500	LIRB	1997-08-10	41.3659	-89.4984	20.5834	5.39309	7.85	3.6225	0.220155	22.8	7.8	554	171	4	22	116566	541689
BDB-000040282	05559500	LIRB	1997-08-11	40.9542	-89.3084	20.1346	5.58287	7.9	0.173	0.02	21	7.1	1086	177	6	28	17620.5	56489.3
BDB-000040283	05563000	LIRB	1997-08-11	40.8006	-89.8004	19.9351	5.18424	7.9	0.718	0.037	23	7.8	681	158	7	19	17649.4	119912
BDB-000040284	05567500	LIRB	1997-08-12	40.6236	-89.2418	19.7693	5.6647	8.1	0.552	0.062	23.5	8.6	558	187	9	30	33553.4	150691
BDB-000040285	05568830	LIRB	1997-08-03	40.957	-89.9762	20.1004	5.0263	8.2	0.605	0.013	26.3	9.6	585	180	6	31	176407	198848
BDB-000040286	05569875	LIRB	1997-08-04	40.6717	-90.376	19.7611	4.71205	7.4	2.509	0.072	23	6.3	467	169	9	27	3961.93	18472.5
BDB-000040287	05570910	LIRB	1997-08-14	40.3106	-88.3223	19.4783	6.46212	7.7	0.241	0.067	23.1	5.2	774	216	9	24	45096.1	51826.9
BDB-000040290	05583900	LIRB	1997-08-05	40.1959	-90.4546	19.2251	4.67735	7.7	0.08	0.012	17.5	7.1	581	149	10	33	56498.5	214796
BDB-000040364	05320230	UMIS	1997-08-18	43.8989	-93.8708	23.2488	1.70401	8.18	9.545	0.027	18.47	8.54	675	310	6	28	12572.8	87017.2
BDB-000040868	05548105	UIRB	2001-08-06	42.3853	-88.3695	21.7899	6.23617	8.0786	4.33107	0.0420789	12.3365	11.1431	866.487	245	10	32	552778	510100
BDB-000040875	05527800	UIRB	2001-08-07	42.4892	-87.9265	21.9355	6.58757	7.74956	2.58868	0.0891026	13.0064	7.32462	867.416	204	8	44	80247.3	88904.7
BDB-000040931	05586645	LIRB	1997-08-07	39.3045	-89.7876	18.2632	5.30441	7.9	0.103	0.051	22.5	5.8	616	174	6	33	100035	536552
BDB-000040934	05568000	LIRB	1997-08-12	40.4542	-89.6062	19.5588	5.37244	7.90233	7.23114	0.0545862	14.0077	10.991	699.6	152	5	23	11480.2	57837
BDB-000041025	01439680	DELR	2001-08-26	41.0979	-75.0038	22.0238	17.3543	6.66	0.092	0.019	7.0575	12.7988	53.7556	120	5	3	221459	2748.6
BDB-000041103	08065800	TRIN	1995-08-25	30.8847	-95.7778	8.67638	0.21189	6.91724	0.349036	0.116429	19.4067	6.44138	413.233	48	4	43	5381.72	54748.7
BDB-000041371	05331580	UMIS	2004-08-18	44.7466	-92.8524	24.2157	2.48746	8.05486	2.35462	0.0867704	12.4384	10.7553	563.739	205	8	27	71098.3	745621
BDB-000041377	04085188	WMIC	2004-08-30	44.6033	-87.527	24.3139	6.70256	7.60857	2.397	0.0856667	10.9286	8.34571	719	204	14	26	1.52782e+06	709811
BDB-000041472	12485940	CCYK	2003-08-17	46.7461	-120.605	28.8248	-18.6635	8.01	1.367	0.0735	17.3	8.93	252	442	5	18	491320	1.69915e+06
BDB-000041548	03240500	WHMI	2004-08-09	39.757	-83.7902	19.262	10.339	7.8	4.7245	0.0525	20.48	9.315	635	313	13	23	97044.8	73194.8
BDB-000041560	394510084545801	WHMI	2004-08-11	39.7529	-84.9163	19.1405	9.39052	8.34	4.9475	0.0305	19.745	8.59	591	273	8	19	801796	1.67081e+06
BDB-000041873	04087270	WMIC	2004-08-23	42.597	-87.8284	22.0624	6.65704	7.752	1.5005	0.0075	20.076	7.664	1274.4	186	7	22	832774	1.14392e+06
BDB-000041878	040872393	WMIC	2004-08-24	42.7728	-87.8662	22.2555	6.60954	7.744	5.5595	0.161	19.758	7.194	832	198	11	24	449206	506962
BDB-000041880	04087258	WMIC	2004-08-23	42.6536	-87.8504	22.1239	6.63378	7.975	5.23117	0.0601667	14.3712	11.3913	684.375	190	8	19	312695	875546
BDB-000041887	04087118	WMIC	2004-08-24	43.0422	-88.0106	22.5455	6.46716	8.04143	1.0388	0.0426	13.82	11.0986	1923.29	203	13	13	24244.9	28208.9
BDB-000041896	040854395	WMIC	2004-08-25	43.965	-87.7262	23.5913	6.60728	7.935	1.953	0.1235	17.8175	9.405	684	190	9	22	753341	305551
BDB-000041908	400421084115601	WHMI	2004-08-08	40.0725	-84.1988	19.569	9.95105	7.955	5.2775	0.045	19.29	9.225	579	256	9	11	823532	439682
BDB-000041911	395121083561701	WHMI	2004-08-09	39.8561	-83.9383	19.3561	10.2002	8.05	4.9285	0.019	19.44	8.835	739	268	11	15	510169	172402
BDB-000041943	12502500	CCYK	2003-08-19	46.536	-120.473	28.5739	-18.6249	8.065	0.32975	0.08775	20.125	9.01	294.25	290	6	22	126159	717659
BDB-000041945	12498980	CCYK	2003-08-19	46.6295	-120.662	28.7112	-18.7388	8.22	0.953	0.1005	17.15	10.395	347	451	6	17	357502	6.37545e+06
BDB-000042059	395350084353800	WHMI	2004-08-11	39.8972	-84.5939	19.3334	9.64304	7.795	4.018	0.057	21.96	8.445	604	317	11	28	297153	106334
BDB-000042087	06800500	CNBR	2004-08-10	41.2933	-96.2838	20.318	-0.235816	8.22357	2.96985	0.266798	15.3131	9.24798	562.937	338	4	27	45036.6	89190.1
BDB-000042269	03272200	WHMI	2004-08-10	39.5012	-84.4597	18.9065	9.80972	8.205	1.798	0.096	26.275	8.17	593.5	201	11	20	708693	437855
BDB-000042270	03264900	WHMI	2004-08-11	40.0828	-84.3977	19.5599	9.78274	7.91	5.871	0.0545	19.5	7.555	580.5	291	14	14	350574	78991.9
BDB-000042419	400540084415601	WHMI	2004-08-11	40.0947	-84.6991	19.5424	9.5283	7.69	2.7685	0.0455	19.58	7.41	594	317	11	24	371675	676488
BDB-000042521	05320270	UMIS	2006-08-20	43.9966	-93.9086	23.3571	1.67138	7.87395	7.52242	0.0907144	12.5676	8.58569	619.299	305	10	33	31558.2	88099.9
BDB-000042561	04087070	WMIC	2004-08-22	43.1236	-88.0437	22.6339	6.43286	7.8	0.2785	0.079	21.146	5.092	938.8	216	6	17	115769	646945
BDB-000042580	392751085291801	WHMI	2004-08-10	39.4643	-85.4884	18.764	8.94359	8.06	5.465	0.0755	21.505	7.455	581	270	8	28	327273	854438
BDB-000042588	392402085503001	WHMI	2004-08-08	39.4007	-85.8417	18.6605	8.65172	7.755	3.503	0.0145	20.05	8.795	579	213	11	22	418340	194063
BDB-000042672	12508820	CCYK	2003-08-25	46.2878	-119.982	28.2122	-18.328	8.265	4.96	0.13	18.9	9.975	384.5	214	6	22	149803	181376
BDB-000042682	12464606	CCYK	2003-08-14	46.9304	-119.9	28.8858	-18.089	8.48917	7.50005	0.0345	13.6	10.9412	476.833	278	6	13	316600	139174
BDB-000042729	11447360	SACR	2006-08-23	38.6418	-121.383	20.2526	-21.6273	7.37643	0.643468	0.143691	15.4862	8.35558	231.286	19	8	24	79452	157526
BDB-000042731	11274538	SANJ	2006-08-27	37.4135	-121.016	18.8405	-21.6804	8.03434	2.56002	0.104517	16.2475	9.48836	648.473	19	5	21	10113.1	203070
BDB-000042780	0408703164	WMIC	2004-08-23	43.1483	-88.0815	22.6588	6.40009	7.88	0.646	0.012	18.3725	9.146	950.6	232	8	22	914678	862623
BDB-000042878	12483995	CCYK	2003-08-13	46.9732	-120.471	29.0416	-18.4999	7.97	0.614	0.0715	17	8.75	206.5	473	6	23	208582	2.11493e+06
BDB-000042924	09163500	UCOL	2006-08-20	39.1328	-109.027	18.6608	-11.1224	8.30358	0.530296	0.0153036	11.8775	9.47149	895.154	1337	4	25	57256.6	190675
BDB-000042945	04085270	WMIC	2004-08-25	44.2619	-87.6812	23.9242	6.61418	7.8125	2.232	0.0135	16.1525	8.195	669.25	193	15	18	874080	327183
BDB-000042950	04085322	WMIC	2004-08-25	44.3092	-87.8268	23.9666	6.49421	7.875	0.525	0.09	16.6925	9.615	617.75	238	12	14	1.21771e+06	1.07953e+06
BDB-000042954	04072050	WMIC	2004-08-26	44.4658	-88.219	24.1144	6.16899	7.90985	2.63793	0.138593	12.7423	9.53371	835.728	207	9	15	498715	140569
BDB-000042966	395327085190801	WHMI	2004-08-11	39.8909	-85.3189	19.255	9.03355	7.64	3.647	0.031	20.34	7.615	431	325	9	25	713512	898260
BDB-000042971	394544086305601	WHMI	2004-08-12	39.7623	-86.5155	19.0044	8.03949	7.945	3.5525	0.107	18.07	7.39	484.5	255	10	20	1.22528e+06	1.13531e+06
BDB-000043064	06800000	CNBR	2006-08-22	41.5604	-96.5408	20.6179	-0.447691	8.1001	4.39233	0.214597	15.4769	9.49933	659.59	374	6	19	134399	1.10008e+06
BDB-000043119	393828086381301	WHMI	2004-08-12	39.6412	-86.637	18.859	7.95017	8.11	1.124	0.1	21.445	10.46	331	231	13	18	374233	93977.8
BDB-000043145	05525500	UIRB	2004-08-17	40.63	-87.7239	19.877	6.93339	7.84039	7.54761	0.0582527	15.2642	9.11156	604.597	190	4	28	121356	516128
BDB-000043310	040851325	WMIC	2004-08-26	44.5011	-87.9362	24.1723	6.38933	7.915	0.152667	0.141667	13.12	9.6375	788.5	207	11	22	253190	396623
BDB-000043320	04081897	WMIC	2004-08-27	44.0153	-88.5946	23.5899	5.91095	7.65286	4.5245	0.0423333	11.2329	10.5643	863	234	8	20	287519	431278
BDB-000043330	04084468	WMIC	2004-08-29	44.2647	-88.3054	23.8855	6.11878	8.035	0.94	0.029	18.92	7.9525	946.25	203	9	29	84092.5	156112
BDB-000043339	393659085340301	WHMI	2004-08-10	39.6163	-85.5676	18.9258	8.85782	8.115	7.582	0.061	20.835	7.695	646.5	280	10	26	486590	593493
BDB-000043457	01209710	CONN	2006-08-21	41.1354	-73.4262	22.3633	18.6247	7.83969	0.457687	0.0246019	14.1931	11.6139	304.626	19	16	18	128457	63494.5
BDB-000043458	01184000	CONN	2006-08-22	41.9873	-72.6054	23.4517	19.0561	7.36011	0.354432	0.0273992	13.3495	10.5136	129.182	11	9	18	130425	69452.2
BDB-000043480	393723085120201	WHMI	2004-08-10	39.6227	-85.2042	18.9674	9.16422	8.37	3.5975	0.025	23.22	8.4	549	273	5	21	1.2381e+06	1.28339e+06
BDB-000043486	395623085090401	WHMI	2004-08-10	39.9397	-85.151	19.3255	9.16872	8.085	2.4185	0.052	20.17	10.005	548.5	309	9	19	1.0577e+06	752996
BDB-000043492	391732085414401	WHMI	2004-08-09	39.2923	-85.6955	18.553	8.78889	8.10314	5.58709	0.1086	14.5188	10.01	485.088	214	8	17	166918	216218
BDB-000043690	040850683	WMIC	2004-08-29	44.4164	-88.1236	24.0658	6.249	7.94	1.179	0.386	15.2	6.26	1210	189	7	34	42677.3	241678
BDB-000043692	040851932	WMIC	2004-08-30	44.5925	-87.7134	24.2889	6.55655	7.97333	0.5005	0.08	17.3667	10.7967	693.333	206	9	26	65008	109721
BDB-000043694	04078085	WMIC	2004-08-29	44.3358	-88.6443	23.9431	5.84372	8.12333	0.7275	0.026	18.2	8.09667	605.333	236	9	12	501391	248825
BDB-000043695	040851235	WMIC	2004-08-29	44.4525	-87.9807	24.1153	6.35876	7.71333	0.0885	0.0485	16.6133	9.02	948.667	183	9	25	231367	1.1945e+06
BDB-000043697	04085046	WMIC	2004-08-30	44.355	-88.1912	23.9932	6.2011	7.96333	0.726	0.092	15.61	11.54	1335.67	195	10	17	132670	263267
BDB-000043740	12472380	CCYK	2003-08-28	46.8768	-119.349	28.7246	-17.6949	8.34512	3.5895	0.0355122	13.414	10.437	456.837	275	8	22	247395	199189
BDB-000043858	393930084410901	WHMI	2004-08-12	39.6584	-84.686	19.0583	9.5973	8.08	2.252	0.288	21.08	8.185	669	290	8	17	483489	1.0267e+06
BDB-000043862	392735083544101	WHMI	2004-08-10	39.4599	-83.9116	18.9185	10.279	8.25	5.34	0.0285	21.765	8.035	636.5	268	11	19	664672	472324
BDB-000043870	393619084461200	WHMI	2004-08-10	39.593	-84.7703	18.9771	9.53475	8.37	6.66467	0.0296667	22.29	8.6375	636	268	8	14	195297	943613
BDB-000043877	393837083505401	WHMI	2004-08-09	39.6439	-83.8486	19.1299	10.306	8.06	3.64	0.024	20.955	7.88	552	287	12	12	279545	59134.4
BDB-000044006	07056695	OZRK	2006-08-15	36.0498	-92.5763	14.4977	3.05614	8.226	0.0798	0.008358	22.2	8.844	290.2	148	5	6	571571	69405
BDB-000044513	01362200	HDSN	2004-08-02	42.117	-74.3801	23.2505	17.6038	7.08296	0.185644	0.0150741	10.2607	11.3349	55.9712	306	7	8	66741	3736.46
BDB-000044886	04086699	WMIC	2004-08-22	43.2336	-87.9856	22.7602	6.46934	7.77667	0.39	0.0145	17.1	9.06667	765	201	9	12	849140	321122
BDB-000045154	395625084010101	WHMI	2004-08-09	39.9404	-84.0172	19.4413	10.122	8.095	5.006	0.036	18.025	8.44	608.5	271	9	10	782609	327950
BDB-000045156	402901083482601	WHMI	2004-08-08	40.4838	-83.8073	20.0678	10.2204	7.755	1.7035	0.046	19.43	8.575	731.5	311	9	25	1.19121e+06	1.53482e+06
BDB-000045211	394211086454801	WHMI	2004-08-12	39.7031	-86.7636	18.9176	7.83629	8.125	1.594	0.0835	21.655	9.32	523	229	10	29	1.16996e+06	1.04086e+06
BDB-000045218	400806085455601	WHMI	2004-08-11	40.1351	-85.7658	19.4855	8.62768	7.48	3.11	0.0765	18.02	6.22	535.5	251	10	11	88946.6	10072.6
BDB-000045223	391726085485101	WHMI	2004-08-08	39.2906	-85.8143	18.5402	8.68816	7.865	3.7275	0.127	20.955	5.675	621	204	11	27	280553	600113
BDB-000045229	391545085454301	WHMI	2004-08-09	39.2625	-85.762	18.5138	8.73602	7.94	2.6085	0.0545	24.435	6.615	413	204	12	38	82605	140543
BDB-000046828	06753990	SPLT	2004-08-08	40.4425	-104.589	19.6911	-7.21367	8.3242	7.63326	0.120111	14.928	11.7355	1878.72	1411	8	17	719400	872464
BDB-000047710	12464770	CCYK	2009-08-18	47.3027	-118.369	29.004	-16.8568	8.31231	1.26018	0.0804178	10.4727	11.552	373.189	509	7	13	449398	1.93437e+06
BDB-000047751	01610400	PODL	2009-08-17	39.0427	-78.5983	19.1588	14.8393	6.90327	0.129909	0.0115404	10.8718	11.1835	56.2673	394	7	6	347860	16697.3
BDB-000047752	01621050	PODL	2009-08-16	38.4865	-78.9609	18.4894	14.6447	7.97877	4.98652	0.108533	15.2802	10.8584	448.809	419	14	26	510446	793766
BDB-000048013	06805500	CNBR	2005-08-29	41.0152	-96.1578	20.0064	-0.131687	8.21953	1.52753	0.204533	14.5072	9.67142	629.957	310	5	40	102005	728036
BDB-000048181	040869415	WMIC	2009-08-26	43.097	-87.9723	22.6091	6.49296	7.97942	0.598042	0.1124	13.6759	11.2101	1700.49	197	9	15	71547	469030
BDB-000048185	07053250	OZRK	2009-08-26	36.454	-93.3566	14.9279	2.34723	8.04619	3.3817	0.0429697	17.4824	9.09584	349.518	298	6	8	21349.6	309246
BDB-000049131	05287890	UMIS	2007-08-09	45.1633	-93.4366	24.6653	2.0134	7.625	0.300333	0.0576533	12.31	8.62	585.333	263	14	23	1.17396e+06	622746
BDB-000049333	05586100	LIRB	2006-08-14	39.7034	-90.6454	18.6649	4.54764	7.99913	4.1571	0.20446	15.8547	9.09594	718.371	129	2	26	294894	618326
BDB-000049335	05572000	LIRB	2006-08-06	40.0309	-88.589	19.148	6.26254	7.90868	7.0646	0.0683887	15.5931	8.83279	630.305	196	9	34	23263.9	57074.2
BDB-000049472	05420680	EIWA	2009-08-05	42.8361	-92.2574	22.1031	3.04138	7.73933	5.42729	0.0414905	12.4758	9.78466	414.552	304	9	24	122557	399365
BDB-000049676	04175600	LERI	2009-08-06	42.1681	-84.0761	21.9096	9.76041	8.01448	0.361461	0.0123739	13.9918	9.45782	497.729	274	10	16	373816	594871
BDB-000049818	06713500	SPLT	2009-08-18	39.7425	-105	18.9423	-7.63213	8.36756	2.00557	0.157062	13.973	9.55088	1044.33	1587	7	16	50408.1	819874
BDB-000049823	10168000	GRSL	2009-08-04	40.6638	-111.902	20.7257	-13.2704	8.02369	0.564907	0.0194077	11.6595	9.85145	1272.36	1295	8	22	172734	332768
BDB-000050014	10172200	GRSL	2009-08-05	40.7799	-111.806	20.8406	-13.1696	8.36786	0.0535541	0.0190031	6.67381	10.6537	611.31	1664	4	13	69628.6	297386
BDB-000050039	05451210	EIWA	2009-08-11	42.3153	-93.1521	21.496	2.33197	8.06177	9.25939	0.0734816	13.4549	10.5212	629.473	298	7	22	109423	200713
BDB-000025210	03245500	WHMI	1999-07-13	39.1714	-84.298	18.5566	9.99185	8.16971	3.00619	0.249839	14.8876	10.3325	732.059	155	3	15	224373	2.58776e+06
BDB-000025216	03246400	WHMI	1999-07-14	39.059	-84.0513	18.4577	10.2172	8.03375	0.925	0.0597895	20.9682	7.7281	511.75	242	8	24	94264.7	221195
BDB-000025546	12424500	NROK	1999-07-29	47.7402	-117.52	29.3273	-16.1199	7.70094	0.772296	0.0184815	10.175	10.7303	141.094	496	2	6	783917	18044.1
BDB-000030024	08173900	SCTX	1998-07-18	29.4844	-97.4503	7.13236	-1.40651	7.95652	0.658435	0.0293043	22.5217	7.93043	508.391	82	6	17	5824.02	116480
BDB-000030025	293422097554299	SCTX	1998-07-19	29.573	-97.9286	7.2388	-1.86837	7.95	11.83	0.0125	21.5	8.9	970	141	7	24	33250.8	449761
BDB-000030028	08180640	SCTX	1998-07-22	29.3241	-98.8131	6.98446	-2.73316	7.72045	2.03509	0.0113636	23.3818	7.12795	512.273	215	8	16	210110	99166.7
BDB-000031172	05056000	REDN	1994-07-20	47.8056	-98.7162	27.5957	-2.04973	7.9	0.10275	0.29	18	4.7075	824.75	424	8	14	676612	964532
BDB-000032078	08313350	RIOG	1995-07-10	35.7764	-106.269	14.6332	-9.18355	7.78788	0.0561	0.028	11.6576	8.89394	107.312	1854	6	15	77914.3	125147
BDB-000032080	08317200	RIOG	1995-07-12	35.547	-106.229	14.3739	-9.17526	8.45972	1.40562	1.14656	12.0694	9.22222	541.528	1685	3	15	18583.1	1.1568e+06
BDB-000033351	03072000	ALMN	1996-07-09	39.7592	-79.9706	19.7445	13.5459	7.59095	0.339848	0.010697	13.094	10.189	1048.62	261	6	10	780445	90367.2
BDB-000033507	03037525	ALMN	1998-06-30	40.7189	-79.2367	20.9099	13.9712	7.19625	0.900541	0.0115676	12.0275	9.997	156.013	316	5	9	3.53069e+06	189385
BDB-000033509	03085000	ALMN	1998-07-16	40.3912	-79.8581	20.4584	13.5204	7.4327	1.15336	0.0142453	14.727	10.0677	376.254	218	5	16	263970	598762
BDB-000033510	03024000	ALMN	1998-07-21	41.4376	-79.9559	21.5996	13.2424	7.68706	0.566875	0.0145	12.8647	10.1171	229.588	308	9	20	453389	483741
BDB-000033644	05548200	UIRB	2000-07-19	42.4647	-88.3001	21.883	6.28561	7.92	4.692	0.029	18.61	7.7	694	237	9	21	9955.51	28316.1
BDB-000033646	055438845	UIRB	2000-07-18	42.9445	-88.3162	22.4163	6.22919	8.14	0.477	0.01	22.05	7.72	669	240	16	16	280099	109526
BDB-000033648	05527960	UIRB	2000-07-17	42.4186	-87.9379	21.8561	6.58499	7.95	1.349	0.081	23.13	6.88	714	203	10	28	10641.5	35191.7
BDB-000033650	05530510	UIRB	2000-07-13	41.99	-87.8601	21.384	6.68938	7.995	3.954	0.326	26.2	8.615	1074	191	10	21	131802	177552
BDB-000033657	05536236	UIRB	2000-07-11	41.5364	-87.5967	20.8972	6.95006	7.6	1.9	0.208	21.895	6.37	690	191	8	42	7857.47	29637.8
BDB-000033658	05551931	UIRB	2000-07-23	41.7334	-88.5079	21.0539	6.18079	8.61	8.299	0.02	21.1	10.01	760	195	10	19	402882	1.01004e+06
BDB-000033659	05539632	UIRB	2000-07-12	41.4298	-88.0962	20.7428	6.54788	7.59	7.547	0.122	23.3	7.805	644	180	9	10	54815.9	146713
BDB-000033660	05552190	UIRB	2000-07-24	41.5359	-88.8523	20.8116	5.91379	8.1	8.242	0.01	21.8	12.1	650	196	5	20	244191	747599
BDB-000033661	05527675	UIRB	2000-07-17	42.5784	-88.049	22.0264	6.47952	8.13	1.289	0.186	25.7	8.63	830	216	8	15	223820	349066
BDB-000033902	01396660	LINJ	1996-06-30	40.6475	-74.9689	21.5381	17.4934	7.39	0.88	0.01	8.8	9.4	219	85	8	6	274663	87832.7
BDB-000033911	01390500	LINJ	1998-07-20	40.985	-74.0906	22.0711	18.1249	7.96848	1.39852	0.0202903	11.3515	11.5867	521.576	23	9	13	1.66812e+06	695051
BDB-000034240	404430111495301	GRSL	2000-07-27	40.7417	-111.831	20.8018	-13.1976	8.2	0.3135	0.01	13.7	9.33333	883.667	1422	4	21	8687.46	70340.4
BDB-000034388	01398000	LINJ	1998-07-19	40.4733	-74.8278	21.3739	17.652	7.76687	1.43264	0.0329643	12.0767	11.5396	264.188	30	5	21	97409.1	104291
BDB-000034603	05551340	UIRB	2000-07-09	41.8223	-88.3248	21.1651	6.32346	8.1	3.636	0.038	24.9	7.5	728	200	9	14	139428	45688.1
BDB-000034604	05536176	UIRB	2000-07-11	41.4567	-87.55	20.8118	6.99648	7.885	3.125	0.173	23.3	7.195	650	198	8	45	9869.78	26442.2
BDB-000034609	05536355	UIRB	2000-07-12	41.6439	-87.68	21.011	6.8708	7.57	0.603	0.035	22	6.02	622	181	6	21	48647	139549
BDB-000034610	05540440	UIRB	2000-07-20	41.57	-88.1853	20.8932	6.46128	7.815	2.402	0.02	19.4	8.225	755	180	9	9	145899	111010
BDB-000034748	05535100	UIRB	2000-07-16	42.1378	-87.7845	21.554	6.73704	7.795	0.284	0.073	23.2	7.81	780	190	12	21	296136	668896
BDB-000034749	05550290	UIRB	2000-07-14	42.057	-88.3384	21.4259	6.29112	8	6.394	0.044	21.6	8.6	803	248	10	14	279222	177687
BDB-000034754	05532000	UIRB	2000-07-13	41.8817	-87.8692	21.2626	6.69222	7.685	2.278	0.556	24.1	6.105	902	190	4	17	32023.2	431246
BDB-000034778	410342111574201	GRSL	2000-07-18	41.0617	-111.962	21.1733	-13.2453	8.3	1.5345	0.0565	13.65	9.12	789	1337	8	22	8407.24	17104.4
BDB-000034806	05528032	UIRB	2000-07-16	42.3145	-87.9623	21.7384	6.57491	8.075	0.473	0.01	25.6	7.695	857	200	10	13	96905	147464
BDB-000035118	05538270	UIRB	2000-07-12	41.5178	-87.9276	20.8528	6.67887	7.68	1.745	0.153	22.9	7.21	735	197	7	20	97714	101367
BDB-000035120	05536272	UIRB	2000-07-11	41.557	-87.5962	20.9202	6.94849	7.62	0.478	0.044	24.1	6.18	760	184	10	27	4395.93	23020.8
BDB-000035121	05533400	UIRB	2000-07-10	41.7078	-87.9631	21.0621	6.63156	7.92	0.456	0.036	24.32	8.27	700	196	8	7	162625	175876
BDB-000035122	05537550	UIRB	2000-07-10	41.6375	-88.0276	20.9793	6.5851	7.4	0.967	0.142	22.2	6.31	570	191	7	12	67918.7	290474
BDB-000035123	05540032	UIRB	2000-07-09	41.8584	-88.1937	21.2142	6.42793	8.02	7.699	1.584	27.3	8.605	974	214	11	27	64563.6	126697
BDB-000035124	05551695	UIRB	2000-07-23	41.6823	-88.4137	21.0031	6.26287	7.925	2.027	0.033	21.1	8.71	798	194	10	15	152560	377444
BDB-000035125	05552450	UIRB	2000-07-24	41.4367	-88.804	20.704	5.9621	7.92	11.423	0.019	20.3	8	729	170	5	18	274653	492584
BDB-000035126	05536500	UIRB	2000-07-12	41.6467	-87.7664	21.0079	6.79936	7.86	0.457	0.016	22.1	8.64	548	186	9	13	52070.8	169230
BDB-000035127	05538490	UIRB	2000-07-20	41.5395	-88.0548	20.8681	6.57183	7.89	1.618	0.025	17.42	8.75	1124	172	8	19	142131	127120
BDB-000035128	05540660	UIRB	2000-07-20	41.4853	-88.1859	20.7987	6.46861	8.43	0.261	0.038	23.41	16.07	1048	167	8	21	37402.1	140018
BDB-000035271	05533000	UIRB	2000-07-12	41.7389	-87.8964	21.1015	6.68348	7.81	9.336	1.488	24.1	8.69	962	187	8	21	27962	114154
BDB-000035272	05544080	UIRB	2000-07-18	42.8589	-88.4326	22.3134	6.14263	8.42	2.198	0.01	18.85	11.68	646	251	16	15	223570	114497
BDB-000035273	05549850	UIRB	2000-07-16	42.2111	-88.1731	21.6088	6.41234	7.98	0.652	0.148	26.6	7.53	942	228	8	15	56449.7	84437.3
BDB-000035274	05550500	UIRB	2000-07-14	42.0261	-88.2556	21.3971	6.36175	7.74	0.501	0.017	22.6	7.2	983	220	11	15	111724	133090
BDB-000035275	05551200	UIRB	2000-07-19	41.9328	-88.3412	21.2873	6.30003	8.43	2.241	0.015	21.04	13.36	881	216	9	12	200195	360128
BDB-000035278	05549000	UIRB	2000-07-19	42.3209	-88.3126	21.7218	6.28843	8.1	1.56	0.01	19	11.7	740	234	13	11	101930	26268.3
BDB-000035281	410041111581101	GRSL	2000-07-25	41.0116	-111.936	21.1143	-13.2332	7.9	2.2185	0.027	12.1333	9.43333	822	1325	8	22	83450.1	66819.5
BDB-000035282	410250111571501	GRSL	2000-07-19	41.0472	-111.954	21.1563	-13.2419	8.1	0.9475	0.0565	11.15	9.575	689	1324	6	15	654108	733662
BDB-000035285	410501111555201	GRSL	2000-07-26	41.0836	-111.931	21.1932	-13.2161	7.9	1.2945	0.0405	11.15	9.4	1080	1395	7	14	116017	21493.7
BDB-000035286	410522111541201	GRSL	2000-07-18	41.0894	-111.903	21.1958	-13.1922	7.7	0.505	0.011	9.65	9.805	93.5	1592	10	12	30909.4	5900.89
BDB-000035287	410148111535301	GRSL	2000-07-25	41.03	-111.898	21.1295	-13.1989	7.5	0.2225	0.01	6.75	10.35	143.5	1487	6	1	86090.1	356.48
BDB-000035288	404317111503601	GRSL	2000-07-16	40.7214	-111.843	20.7811	-13.2113	7.86667	1.884	0.01	11.8333	10.4333	1010.67	1363	5	14	1.83899e+06	508755
BDB-000035289	10167800	GRSL	2000-07-23	40.6144	-111.843	20.6629	-13.2309	8.15226	0.969897	0.0154828	9.71613	10.8432	541.129	1381	4	5	748946	128391
BDB-000035290	403927111523601	GRSL	2000-07-16	40.6575	-111.877	20.7152	-13.2507	8.3	0.5705	0.0135	13.45	11.625	801.5	1310	6	8	415106	1.02842e+06
BDB-000035292	404143111500101	GRSL	2000-07-24	40.6953	-111.834	20.7509	-13.2081	8.43333	0.092	0.011	11.2	9.87	658.333	1382	7	12	69615.1	12027
BDB-000035293	404218111525601	GRSL	2000-07-17	40.705	-111.882	20.7684	-13.2465	7.86667	1.6235	0.012	16.4333	9.06	1067	1298	8	20	266981	136632
BDB-000035294	403945111501001	GRSL	2000-07-20	40.6625	-111.836	20.715	-13.2163	8.25	0.3905	0.01	13.05	9.7	945	1330	9	20	409752	1.07048e+06
BDB-000035295	404000111515801	GRSL	2000-07-23	40.6667	-111.866	20.7238	-13.2403	8.23333	0.631	0.0115	16.1667	9.63333	1069	1308	10	17	226822	231862
BDB-000035296	405854111534801	GRSL	2000-07-30	40.9817	-111.897	21.0759	-13.2068	7.85	0.2815	0.027	12.7	9.675	309.5	1296	8	16	51943.2	15968.4
BDB-000035298	404349111512201	GRSL	2000-07-30	40.7303	-111.856	20.7927	-13.2202	8.1	0.511	0.01	11.15	9.705	902.5	1342	6	20	2.00824e+06	3.51692e+06
BDB-000035304	410453111570001	GRSL	2000-07-25	41.0814	-111.95	21.1934	-13.2321	8.23333	1.6575	0.063	9.6	9.59	998	1367	8	12	316276	102089
BDB-000035797	05539335	UIRB	2000-07-10	41.5025	-88.0781	20.8252	6.55602	7.805	12.937	0.099	20.6	8.585	595	172	10	18	55270.7	75369.2
BDB-000035799	055438135	UIRB	2000-07-18	43.047	-88.2159	22.537	6.30093	7.405	0.05	0.041	20	4.99	647	255	14	30	81362.6	80060.8
BDB-000035812	05545955	UIRB	2000-07-17	42.5409	-88.2279	21.9726	6.33749	7.75	2.95	0.371	19.5	4.83	1770	239	14	16	106255	47996.6
BDB-000035830	404140111481601	GRSL	2000-07-24	40.6944	-111.804	20.7459	-13.1841	8.4	0.082	0.0115	8.65	10.8	584.5	1477	5	13	494289	131882
BDB-000036394	412338097533201	CNBR	2003-07-23	41.3938	-97.8926	20.4458	-1.5704	8.12	1.9325	0.3195	20.395	7.095	494.5	493	3	42	4906.32	196253
BDB-000036405	412441098033901	CNBR	2003-07-23	41.4115	-98.061	20.4685	-1.70973	7.905	1.144	0.321	22.425	6.755	595	508	3	36	51776	690346
BDB-000036433	06720500	SPLT	1994-07-21	39.9219	-104.868	19.132	-7.50206	7.79714	4.06325	1.26375	15.7533	8.2	858.067	1527	7	16	120798	354724
BDB-000036501	405121077342701	LSUS	1993-07-13	40.8559	-77.5739	21.3169	15.3108	7.7	3.1	0.05	15.35	8.8	443	327	11	7	429324	209591
BDB-000036506	402836078103601	LSUS	1993-07-22	40.4767	-78.1764	20.8042	14.8953	8.5	5	0.07	21	8.6	387	249	9	10	362231	128793
BDB-000036873	400607105094401	SPLT	2003-07-01	40.1019	-105.162	19.3563	-7.73052	7.99	1.2945	0.023	19.4667	6.01667	1368.33	1544	7	19	487482	82953.9
BDB-000036878	393613104511401	SPLT	2003-06-30	39.6036	-104.854	18.7757	-7.52308	7.96	0.927	0.014	18.9	7.15667	1479	1717	9	32	176709	241813
BDB-000036921	414008098295801	CNBR	2003-07-24	41.1689	-98.4997	20.2057	-2.08067	7.865	2.752	0.514	24.37	7.02	416	556	5	33	20857.4	127505
BDB-000036934	06784500	CNBR	2003-07-24	41.1196	-98.6127	20.1531	-2.17628	7.76	1.2585	0.5765	21.815	6.49	424.5	581	5	23	1662.14	20776.7
BDB-000036945	411320099154301	CNBR	2003-07-25	41.2222	-99.2622	20.2846	-2.71314	7.89	1.846	0.6665	21.315	7.28	500.5	670	7	38	27227.8	70307.5
BDB-000037012	01361200	HDSN	1995-07-11	42.2151	-73.729	23.4795	18.0989	7.5745	1.06667	0.0175	11.6795	10.9921	243.524	45	8	10	647177	486499
BDB-000037013	01334500	HDSN	1995-07-12	42.9387	-73.3771	24.3331	18.1888	7.68371	0.484091	0.0259091	12.9409	10.7934	232.857	112	8	13	736294	879045
BDB-000037019	01371500	HDSN	1995-07-17	41.6862	-74.1651	22.8212	17.8855	7.81892	0.985926	0.0996296	10.7691	12.2984	324.776	56	10	18	20433.3	11375.2
BDB-000037104	413311097171001	CNBR	2003-07-30	41.5531	-97.2865	20.6157	-1.06514	7.78	1.6925	0.418	22.73	5.255	750.5	470	4	31	64766.5	206937
BDB-000037105	06772000	CNBR	2003-07-25	40.8523	-98.4745	19.8508	-2.06893	8.27955	8.84847	1.285	18.6474	9.46364	1105.74	582	8	30	4974.1	25341.7
BDB-000037125	404523099253501	CNBR	2003-07-29	40.7564	-99.4267	19.7682	-2.86863	8.35	0.416	0.0455	25.77	6.59	747	705	9	37	5250.82	35963.1
BDB-000038067	10038000	GRSL	2003-07-30	42.1266	-110.973	22.2167	-12.2451	8.26418	0.0752281	0.0147018	6.62333	11.0706	559.836	1871	13	13	614547	210336
BDB-000039080	03461500	TENN	1996-07-10	35.9607	-83.1743	15.1152	11.4298	7.81714	0.328429	0.0234286	13.9312	10.1957	174.075	320	6	10	763103	2.27085e+06
BDB-000039081	03455000	TENN	1996-07-11	35.9816	-83.1611	15.1401	11.4384	7.25179	0.552036	0.0436786	13.9441	10.3475	74.375	309	9	13	1.32769e+06	462573
BDB-000039082	03467609	TENN	1996-07-14	36.1263	-83.1753	15.299	11.404	7.94679	0.682776	0.0240299	17.7814	9.13371	204.44	321	14	14	707572	129394
BDB-000039096	03528000	TENN	1998-07-08	36.4251	-83.3982	15.6041	11.1627	8.15	0.4715	0.0113929	16.75	10.7815	324.579	327	9	10	222155	117365
BDB-000039124	401334076551001	LSUS	1994-07-11	40.2262	-76.9191	20.7331	15.9883	7.22	2.2	0.01	14.25	7.51	725.5	108	8	11	87943.2	53174.9
BDB-000039125	401327076550401	LSUS	1994-07-12	40.2243	-76.9175	20.7312	15.9902	7.45	1.85	0.01	15.3	8.62	712.333	113	11	26	56510.2	48500.9
BDB-000039139	401045077233301	LSUS	1995-07-10	40.1793	-77.3922	20.6029	15.6073	7.955	5.7	0.01	15.79	7.665	486	147	6	17	305803	1.75484e+06
BDB-000039140	400554077334801	LSUS	1995-07-11	40.0984	-77.563	20.4861	15.4833	8.075	6.6	0.06	17.06	9.63	536.75	179	6	15	826578	1.39408e+06
BDB-000039179	400038076332301	LSUS	1995-07-25	40.0107	-76.5561	20.5583	16.3374	7.91	5	0.01	19.22	8.625	352.5	86	9	17	498877	1.08148e+06
BDB-000039424	393317083474000	WHMI	2001-07-30	39.5534	-83.7955	19.0351	10.3638	8	0.179	0.02	25.7	7.01	534	304	11	23	163383	113873
BDB-000039533	10130500	GRSL	2001-07-08	40.8952	-111.402	20.9127	-12.815	8.45588	0.192458	0.0324167	8.12059	11.8935	467.235	1712	8	10	274297	587779
BDB-000039534	10102200	GRSL	2001-07-11	41.9263	-111.854	22.1125	-12.9958	8.22024	1.1645	0.0635588	10.4952	10.5885	488.952	1361	10	23	559053	527850
BDB-000039755	444002123163603	WILL	1994-07-26	44.6671	-123.278	27.1627	-21.2913	7.49	0.086	0.01	16.8	9.2	241	102	9	9	3983.12	775.932
BDB-000039760	14201000	WILL	1994-07-28	45.0629	-122.83	27.4864	-20.8287	6.83	0.64	0.03	15.31	8.86	55.1	44	9	36	385490	385490
BDB-000039761	394549084234400	WHMI	2001-07-19	39.764	-84.3948	19.2056	9.82868	7.83	1.076	0.036	20.6	5.4	680	279	9	12	363002	67500.4
BDB-000039885	394252084010900	WHMI	2001-07-08	39.7138	-84.0213	19.189	10.1505	7.9	1.117	0.02	22.7	8.4	697	243	11	35	42120.9	58023.6
BDB-000039887	395912084214000	WHMI	2001-07-18	39.9867	-84.3613	19.4568	9.82647	8.03	7.697	0.048	19.9	7.51	675	280	7	12	298688	109961
BDB-000039890	393848083521200	WHMI	2001-07-24	39.6333	-83.8697	19.1159	10.2897	7.94	2.167	0.009	26.1	7.87	665.5	282	8	25	368531	381417
BDB-000039891	392400083494000	WHMI	2001-07-23	39.4009	-83.8284	18.862	10.3578	8.04	0.966	0.02	26.6	7.57	602	303	10	21	197058	237747
BDB-000039893	392306084121300	WHMI	2001-07-22	39.3836	-84.2041	18.8025	10.0422	7.86	0.173	0.029	21	7.8	791	201	4	14	19839.7	45738.2
BDB-000039895	392027083430100	WHMI	2001-07-25	39.341	-83.7179	18.8075	10.46	7.81	2.579	0.23	22.1	7.33	425	325	7	27	403824	719860
BDB-000039901	393903083582900	WHMI	2001-07-24	39.6504	-83.9755	19.1234	10.198	7.83	2.397	0.135	20.6	7.24	932	261	8	13	313133	353131
BDB-000039903	393903084110500	WHMI	2001-07-09	39.651	-84.1862	19.1016	10.0202	7.93	0.321	0.02	23.8	5.8	653	247	4	20	50049.8	188878
BDB-000039905	395810084063600	WHMI	2001-07-11	39.9695	-84.1088	19.464	10.0409	8.1	4.837	0.084	18.1	7.9	746	247	4	18	274127	826411
BDB-000039907	393814084043500	WHMI	2001-07-09	39.6362	-84.0754	19.097	10.1157	8.17	0.734	0.02	25.2	10.6	849	239	7	14	600038	384271
BDB-000039909	394111084234200	WHMI	2001-07-16	39.6723	-84.3947	19.1036	9.84135	7.91	3.733	0.219	21.3	4.4	970	240	8	12	668303	295256
BDB-000039912	400439084080000	WHMI	2001-07-11	40.0777	-84.1339	19.5816	10.0048	8.15	6.339	0.017	20.2	9.4	709	284	8	11	433623	363500
BDB-000039914	394253083583300	WHMI	2001-07-12	39.7151	-83.9755	19.1953	10.1889	8.12	3.03	0.018	16.4	8.3	754	246	8	33	64741.6	216697
BDB-000039921	392219084172100	WHMI	2001-07-29	39.3726	-84.2883	18.7813	9.97234	7.82	0.306	0.034	22.8	5.05	527.5	221	5	16	68273.5	1.01272e+06
BDB-000039922	400130084392900	WHMI	2001-07-17	40.0262	-84.6583	19.4703	9.57162	7.76	1.055	0.02	21.8	6.47	628	321	8	11	41361	2598.59
BDB-000040052	394510084384100	WHMI	2001-07-15	39.7464	-84.6427	19.1607	9.62208	8.11	5.918	0.024	18.3	7.9	724	311	8	9	1.35527e+06	180703
BDB-000040055	394212083575200	WHMI	2001-07-10	39.7038	-83.9663	19.1838	10.1982	7.93	1.528	0.018	23.8	5.3	653	249	4	15	249213	913116
BDB-000040056	393748084042300	WHMI	2001-07-08	39.6301	-84.0713	19.0906	10.12	7.8	0.472	0.015	20.7	7.6	726	235	8	19	296427	1.6269e+06
BDB-000040058	395452084293400	WHMI	2001-07-18	39.8884	-84.4938	19.3337	9.72841	7.6	4.345	0.07	22.2	4.26	719	306	8	21	252052	194014
BDB-000040372	13081500	USNK	1993-07-20	42.6728	-113.5	23.1699	-14.1782	8.44222	0.229556	0.02	10.3447	10.1083	462.067	1261	8	13	686910	433052
BDB-000040390	392614083564000	WHMI	2001-07-23	39.4359	-83.9444	18.8884	10.2547	7.85	0.925	0.011	24.1	5.6	346.43	262	5	19	419349	1.65552e+06
BDB-000040392	392553084133100	WHMI	2001-07-30	39.4314	-84.2253	18.8534	10.0176	8.065	0.596	0.036	22.9	6.924	621	203	5	14	673962	984570
BDB-000040394	393450084020300	WHMI	2001-07-25	39.5801	-84.0327	19.0392	10.1597	8.11	1.863	0.02	20.8	7.47	658	228	7	25	190792	178527
BDB-000040396	394953084244100	WHMI	2001-07-16	39.8315	-84.4116	19.279	9.80533	8.03	3.168	0.043	21.3	5.8	685	304	6	14	478164	147897
BDB-000040398	394727083523000	WHMI	2001-07-10	39.7909	-83.8794	19.29	10.2591	8.12	4.986	0.017	19.5	8.35	776	264	7	18	314425	502185
BDB-000041491	07057100	OZRK	2006-07-23	35.9787	-92.4815	14.4212	3.1436	8.19	0.2216	0.01555	22.14	9.456	297	186	6	5	58914.7	32414
BDB-000042229	13073000	USNK	2007-07-27	42.6256	-112.088	22.9156	-13.0544	8.20282	0.649462	0.0202851	13	9.66538	731.125	1503	11	21	260133	938624
BDB-000042326	11074000	SOCA	2006-07-25	33.8833	-117.645	14.2729	-19.7062	8.02821	4.42513	0.803077	18.437	9.40929	927.879	137	13	27	23049.5	23269.1
BDB-000043135	08049580	TRIN	2004-07-01	32.491	-97.1231	10.4709	-1.04969	7.9	0.3165	0.007	14.75	8.8	916.5	180	7	19	61553	79004.9
BDB-000044004	07194947	OZRK	2006-07-30	36.2537	-94.2702	14.685	1.54017	7.976	3.921	0.030882	19.64	9.328	294.6	335	6	12	39220.1	68635.2
BDB-000044010	07188855	OZRK	2006-07-26	36.8112	-94.2102	15.3103	1.58182	7.408	4.1688	0.031992	17.22	8.702	322.6	334	7	9	66092	51014
BDB-000044369	403356105024001	SPLT	2003-07-06	40.5656	-105.044	19.8638	-7.58209	8.06333	0.891	0.023	17.7333	8.9	540.333	1497	7	21	587665	308573
BDB-000044381	402549105043101	SPLT	2003-07-13	40.4303	-105.075	19.7154	-7.62231	8	1.5995	0.019	17.4	8.8	840	1524	8	17	439609	184763
BDB-000044740	410714104480101	SPLT	2003-07-08	41.1206	-104.8	20.4634	-7.32053	7.45	1.147	0.0215	14.25	6.75	607.5	1833	6	23	674200	483276
BDB-000044743	403048105042701	SPLT	2003-07-07	40.5133	-105.074	19.808	-7.6127	8.03333	1.858	0.0185	8.95	9.11667	3080	1504	6	18	730340	919283
BDB-000044749	403308105001601	SPLT	2003-07-07	40.5522	-105.004	19.8458	-7.55008	8.11667	4.76417	0.0183333	11.6167	11.0467	2341.67	1487	10	13	859327	140906
BDB-000044751	395324105035001	SPLT	2003-07-01	39.89	-105.064	19.112	-7.67042	8.3	0.3055	0.019	18.5667	8.68333	516.667	1613	10	24	99640.9	54436.4
BDB-000044845	03353637	WHMI	2004-07-06	39.6667	-86.1967	18.9252	8.31982	8.03208	0.726075	0.0209143	15.0173	10.0003	764.125	205	8	19	569150	1.10886e+06
BDB-000045379	06767500	CNBR	2003-07-29	40.6414	-99.7106	19.6484	-3.11128	8.134	1.5854	0.4786	22.418	7.132	884.4	733	7	41	8641.33	65492.2
BDB-000045609	413548098575901	CNBR	2003-07-26	41.5967	-98.9667	20.6955	-2.45436	7.575	2.5115	0.677	22.115	5.61	578	630	3	36	12109.6	249457
BDB-000045615	06781800	CNBR	2003-07-28	41.3033	-99.931	20.3964	-3.26525	7.988	0.9502	0.106	19.428	8.288	301.8	772	12	28	134958	231666
BDB-000046114	405129099493201	CNBR	2003-07-29	40.8581	-99.8261	19.8947	-3.19826	7.785	0.5165	0.2465	21.135	6.66	914.5	747	11	46	8973.89	82634.6
BDB-000046115	413931098585901	CNBR	2003-07-27	41.6587	-98.9834	20.7654	-2.46595	7.395	0.9455	0.4505	19.76	6.08	456.5	628	5	43	9506.08	88795.4
BDB-000046133	06788898	CNBR	2003-07-26	41.5019	-98.7966	20.5853	-2.31682	7.805	0.74	0.716	22.075	6.12	546	606	6	41	3797.06	15508.5
BDB-000046484	400855105090501	SPLT	2003-07-02	40.1486	-105.151	19.4075	-7.71638	8.425	1.6125	0.0255	10.7	13.8267	1862.17	1529	6	19	357307	322868
BDB-000046856	400925105023201	SPLT	2003-07-02	40.1569	-105.042	19.408	-7.62372	8.35	1.9925	0.0185	17.75	12.03	1350	1499	9	12	1.64708e+06	511162
BDB-000048946	06754000	SPLT	2006-07-25	40.4122	-104.563	19.6554	-7.19532	8.10989	5.69947	0.588195	13.0768	9.49027	1224.9	1395	5	21	189275	1.40651e+06
BDB-000048960	01356190	HDSN	2006-07-24	42.7834	-73.8571	24.0734	17.85	7.84093	0.42563	0.0132238	11.7884	11.0556	856.678	80	9	15	294815	209361
BDB-000049261	01654000	PODL	2009-07-13	38.8129	-77.2283	19.1285	16.0435	7.09753	0.670518	0.0146307	15.5808	9.10474	342.81	61	11	19	313705	54295.1
BDB-000049264	0242354750	MOBL	2009-07-22	33.3134	-86.8064	11.7934	8.49111	7.74416	1.63019	0.142908	17.5521	8.57995	283.253	136	11	22	6345.19	4678.78
BDB-000049467	01349150	HDSN	2009-07-27	42.8762	-74.6029	24.0366	17.236	7.72929	0.614904	0.0134678	13.9051	9.86049	725.986	198	9	15	297419	153216
BDB-000049522	05314510	UMIS	2007-07-30	44.84	-95.2392	24.2808	0.600535	7.81	8.05233	0.114583	21.66	7.86333	1102.33	320	17	23	1.12382e+06	1.32759e+06
BDB-000049915	08064100	TRIN	2005-07-19	32.1985	-96.5203	10.1399	-0.488066	7.74173	0.770015	0.05	19.761	7.62436	597.318	109	2	31	7043.86	237730

## Sheet: Distinct preference mode
Sample ID	Station ID	Study Unit	Collection date	Latitude (degrees)	Longitude (degrees)	Projected latitude (km x 100)	Projected longitude (km x 100)	pH	NO2+NO3 (mg/L)	PO4 (mg/L)	Water temperature (°C)	Dissolved oxygen (mg/L)	Specific conductance (µS/cm)	Elevation (m)	Low profile guild richness	Acid tolerant guild richness	Motile guild richness	Low profile guild density (cells/cm^2)	Acid tolerant guild density (cells/cm^2)	Motile guild density (cells/cm^2)
BDB-000025087	05520500	UIRB	1999-07-20	41.16	-87.6686	20.4723	6.92761	7.89152	2.2848	0.0222333	15.36	10.0035	615.424	187	13	1	33	3710.03	74.95	12104.4
BDB-000025094	05526000	UIRB	1999-07-21	41.0089	-87.8234	20.2926	6.81381	7.84417	6.97467	0.0501212	15.5969	9.68382	617.528	188	6	1	27	636.557	212.186	9463.49
BDB-000025220	393259085101200	WHMI	1999-07-12	39.5498	-85.17	18.8896	9.20245	7.7	3.123	0.011	20	9.61	651	225	8	1	13	304506	83468.5	344694
BDB-000025225	392246084340100	WHMI	1999-07-12	39.3795	-84.5669	18.7602	9.73538	8.37	4.064	0.127	27.75	9.975	737	169	6	1	16	234166	21437.7	532645
BDB-000025550	12422000	NROK	1999-07-28	47.6777	-117.373	29.2351	-16.0269	7.90476	0.2939	0.0032	10.6714	8	107.476	581	7	3	9	421637	21129.9	16327.6
BDB-000026664	01109595	NECB	2000-08-15	42.2386	-71.8244	23.8829	19.6079	7.075	0.3005	0.015	15.55	9.775	262	141	5	3	9	66666.8	913.243	9741.27
BDB-000029231	474206115513400	NROK	2000-08-08	47.7016	-115.86	29.0147	-14.9042	6.84	0.021	0.004	10.95	9.8	30	970	5	3	3	9992.64	1350.36	1890.5
BDB-000029821	021603257	SANT	1996-07-29	34.8632	-82.2507	14.0148	12.4245	6.63407	0.662333	0.0140741	14.6519	9.41556	53.7889	246	3	7	13	510747	92026.5	200924
BDB-000029825	02169500	SANT	1997-07-08	33.9932	-81.0498	13.2179	13.6534	6.95778	0.332846	0.0154615	15.5407	8.54037	78.4556	33	6	3	45	270426	33803.3	1.29467e+06
BDB-000029828	02169000	SANT	1998-07-28	34.014	-81.0879	13.2354	13.6153	6.71043	0.392043	0.02	13.7304	8.96783	74.5391	47	9	3	6	321884	4135.55	12406.7
BDB-000029842	021607224	SANT	1998-08-18	34.4251	-81.6048	13.6169	13.0777	6.71652	0.0764783	0.0136304	14.1717	9.02778	85.2622	99	13	4	47	10927	3317.13	86050.4
BDB-000031017	02334442	ACFB	1995-07-30	34.1482	-84.0891	12.9971	10.8726	6.24	0.13	0.01	20.35	7.66	36	288	8	8	13	76908.5	24882.1	11310.1
BDB-000031212	340455117173801	SOCA	2000-08-14	34.0819	-117.294	14.417	-19.3423	8.7	1.17	0.038	32.5	9.6	516	299	5	1	13	35516.1	612.347	34046.5
BDB-000031501	451259122481902	WILL	1994-07-31	45.2162	-122.806	27.645	-20.7631	7.27	2.425	0.1	15.155	4.815	303.5	40	7	1	13	198393	2939.15	393846
BDB-000031502	451350122415603	WILL	1994-07-31	45.2304	-122.7	27.637	-20.6785	6.88	8.7	0.08	16.3	9.36	239	41	7	2	21	100801	1014.77	47355.9
BDB-000031503	453205122223701	WILL	1994-08-07	45.5346	-122.378	27.8925	-20.343	7.33333	2	0.05	15.5	8.605	179.8	17	8	1	2	43791.7	265.404	17516.7
BDB-000031904	06768000	CNBR	1993-08-17	40.6826	-99.5406	19.6891	-2.96704	8.41958	1.33287	0.0729722	18.0308	9.37692	936.769	703	8	1	26	377087	39994	2.10826e+06
BDB-000032648	06327500	YELL	2000-08-24	47.1	-104.717	27.0917	-6.64131	8.5	0.05	0.01	21.5	1	698	629	7	1	15	13170.2	33.5119	3954.4
BDB-000033056	14211720	WILL	1993-08-15	45.5185	-122.668	27.9377	-20.5656	7.23464	0.52328	0.0313718	12.5261	11.0475	75.7328	2	6	1	20	235882	11057	1.49269e+06
BDB-000033058	14207500	WILL	1993-08-17	45.3507	-122.676	27.7603	-20.6235	7.13327	1.77556	0.0592593	14.111	9.0175	181.521	33	6	3	15	80854.7	69829	1.35615e+06
BDB-000033287	410231111565001	GRSL	2000-07-19	41.0419	-111.947	21.1495	-13.2371	8.33333	0.4735	0.0185	15.7333	9.12667	566.667	1329	5	1	10	506242	2062.08	101042
BDB-000033508	03049625	ALMN	1998-07-15	40.5645	-79.7725	20.662	13.5584	7.37246	0.638	0.0111071	13.9982	10.3327	261.702	223	8	2	16	106904	1449.55	45660.9
BDB-000033511	03070350	ALMN	1998-07-28	39.5945	-79.7487	19.5945	13.7631	6.98621	0.418345	0.0104138	13.7833	10.1345	114.833	290	5	2	9	3952.56	517.597	5223.03
BDB-000033656	05551548	UIRB	2000-07-20	41.6861	-88.3495	21.0117	6.31538	7.83	2.252	0.011	18	8.36	794	186	11	1	7	132491	2255.16	89642.5
BDB-000033693	01105000	NECB	2000-08-07	42.1776	-71.2009	23.9473	20.1199	7.1005	0.331455	0.0133939	15.3	9.66917	255.167	17	9	3	12	35730.5	666.304	3581.38
BDB-000033699	01105504	NECB	2000-08-07	42.1587	-71.1548	23.9366	20.1619	7.05286	0.294286	0.0158571	20.6	8.59286	195.543	22	9	4	6	49008.1	1428.49	3076.74
BDB-000033810	010734833	NECB	2000-08-23	43.1186	-71.0222	25.0008	19.9882	6.44	0.063	0.01	12.8	11	105.5	32	2	3	4	33039	2255.43	548.617
BDB-000033814	01073458	NECB	2000-08-23	43.0981	-71.0594	24.9708	19.9651	6.55	0.05	0.01	13.3	10.95	68.5	40	3	3	2	32098.6	399.805	285.575
BDB-000033819	01072904	NECB	2000-08-24	43.1803	-70.8894	25.0953	20.074	6.815	0.16	0.01	12.5	10.2	103	19	4	3	7	27894.6	642.486	1284.97
BDB-000033854	05461390	EIWA	1997-08-24	42.9072	-92.7207	22.1686	2.66227	7.95472	9.0986	0.109514	9.70833	10.5472	469.194	294	6	1	27	88751.4	2113.13	471227
BDB-000033857	05455100	EIWA	1997-08-10	41.6064	-91.6157	20.7517	3.62591	7.745	6.276	0.0943256	12.6979	10.0038	453.985	198	8	1	28	60533.8	1458.64	323819
BDB-000033858	05421870	EIWA	1997-08-13	41.7381	-90.6907	20.9379	4.38198	7.9	6.7925	0.01	19.85	7.8	597.5	195	5	1	24	24994.9	961.341	241777
BDB-000033861	05452020	EIWA	1997-08-20	41.8919	-92.3002	21.0469	3.04772	7.93	6.3815	0.035	19.75	9.25	581.5	235	7	1	33	71973.8	1050.71	224327
BDB-000033870	05464220	EIWA	1998-08-10	42.2517	-92.2988	21.449	3.0332	8.00804	9.65062	0.0801091	12.5786	10.1589	530.25	257	7	1	23	7472.8	1067.54	113426
BDB-000033903	01379000	LINJ	1996-07-07	40.68	-74.5289	21.6554	17.8451	6.8625	0.4505	0.0195	11.1	5.13333	289.25	79	6	4	17	61526.5	4950.4	108909
BDB-000034152	01094005	NECB	2000-08-27	42.8933	-71.5142	24.655	19.6675	6.67	0.112	0.01	14.7	8.46	130.5	60	5	7	6	13651.2	978.868	370.382
BDB-000034157	01072845	NECB	2000-08-28	43.2542	-71.1028	25.1301	19.886	6.33	0.05	0.01	10.95	9.75	52.5	83	3	6	5	46019.1	5246.18	828.343
BDB-000034218	01193340	NECB	2000-08-01	41.6081	-72.4264	23.0764	19.3031	7	0.1705	0.01	14.3	10.21	79	59	3	1	2	69442	492.496	1231.24
BDB-000034284	01089743	NECB	2000-08-28	43.2239	-71.3461	25.0468	19.7047	6.53	0.0565	0.01	15.0333	10.18	88	106	2	5	1	10155.6	456.433	76.0721
BDB-000034289	01073260	NECB	2000-08-29	43.0833	-71.2333	24.9185	19.8333	6.36	0.0875	0.01	10.9	10.06	88.5	66	1	7	2	26325.9	3233.01	667.128
BDB-000034294	01090477	NECB	2000-08-29	43.0253	-71.5047	24.7995	19.6373	6.75875	0.0681429	0.0171429	18.35	9.26125	108.5	83	2	3	0	35148.8	362.358
BDB-000034372	01410784	LINJ	1997-07-20	39.7336	-74.9511	20.5426	17.7329	5.88204	0.37602	0.02686	12.7269	7.9262	76.3278	35	13	10	14	4436.88	9872.06	9317.45
BDB-000034387	01401000	LINJ	1998-07-23	40.3331	-74.6819	21.2479	17.8065	7.66971	0.610548	0.0438387	13.0065	11.2617	218.689	19	10	1	20	220774	3345.06	149691
BDB-000034481	010965852	NECB	2000-08-30	42.7829	-71.3537	24.569	19.8252	7.0175	0.2665	0.01	16.825	8.5775	343	48	9	4	6	80161.6	1821.85	2429.14
BDB-000034605	05551939	UIRB	2000-07-25	41.6359	-88.5409	20.943	6.16213	7.93	7.445	0.137	19	8.48	800	173	5	1	15	893659	11995.4	2.26114e+06
BDB-000034712	01109000	NECB	2000-08-08	41.9476	-71.1767	23.7039	20.2055	6.7425	0.195829	0.0127714	14.0806	9.02083	217.611	19	7	6	9	29701.3	3516.27	2094.8
BDB-000034717	01112262	NECB	2000-08-09	42.0408	-71.5156	23.7331	19.9092	6.63571	0.766714	0.0157143	18.9571	8.39143	213.857	54	12	5	13	59144.3	3486.96	7644.5
BDB-000034722	011032058	NECB	2000-08-09	42.1197	-71.4528	23.8316	19.9366	6.99	1.73186	0.0164286	20.8125	7.1275	586.125	62	10	5	12	37197.4	2543.42	9855.73
BDB-000034727	01097476	NECB	2000-08-10	42.2625	-71.4633	23.9838	19.8875	6.97	0.2505	0.01	17.5	9.77	348	56	7	7	6	42448.6	3909.74	6255.58
BDB-000034973	01476950	DELR	2000-08-22	39.8768	-75.451	20.6071	17.284	7.7	3.459	0.1045	19.0333	9.16667	304.333	41	5	1	13	165977	5029.59	213758
BDB-000034974	01471667	DELR	2000-08-30	40.2392	-75.8302	20.9357	16.8844	7.57667	0.9915	0.0155	16.6667	9.28	139	97	7	3	9	428995	10355.1	47337.4
BDB-000034978	01480665	DELR	2000-08-14	40.0523	-75.7241	20.7499	17.0162	7.86667	2.9225	0.0185	16.7333	11.69	196	89	9	1	9	1.09505e+06	8295.83	76736.4
BDB-000034979	01480775	DELR	2000-08-14	40.0034	-75.7241	20.6964	17.0278	7.82667	2.9825	0.014	16.0467	10.0833	311.667	76	7	1	16	189917	1449.75	126128
BDB-000035059	12091300	PUGT	1997-08-17	47.1982	-122.523	29.6966	-19.9434	7.8	0.698	0.132	13	9.3	132	57	9	1	9	1.0543e+06	5206.42	119748
BDB-000035129	05536248	UIRB	2000-07-11	41.522	-87.6845	20.8748	6.87906	7.89	0.788	0.053	22.3	7.42	571	199	8	1	11	30839.2	780.74	173715
BDB-000035237	01096544	NECB	2000-08-13	42.6178	-71.4022	24.3806	19.8342	7.325	0.196714	0.0171429	19.1	8.47	364.875	40	8	3	4	18571.6	352.067	616.118
BDB-000035242	01097270	NECB	2000-08-14	42.4594	-71.4428	24.201	19.8475	6.9	0.0805	0.016	15	9.875	221	50	9	7	13	37340.7	8508.02	13471
BDB-000035246	01096945	NECB	2000-08-14	42.4267	-71.4853	24.1567	19.8232	6.75	0.0835	0.01	15.65	8.8	263.5	55	4	6	7	37239.4	3103.28	853.402
BDB-000035317	01105581	NECB	2000-08-06	42.22	-70.9989	24.036	20.2676	7	0.081	0.01	18.3333	6.99333	572.667	32	6	7	16	218498	68435.2	59365.4
BDB-000035339	01475543	DELR	2000-08-16	39.9517	-75.2514	20.7255	17.4311	7.76667	2.3195	0.0295	19.3	8.15	469.667	16	5	1	13	249935	657.72	49329.2
BDB-000035539	252414080333200	SOFL	1998-08-03	25.4043	-80.5587	3.89705	15.6378	7.45789	0.0504274	0.0035812	25.125	3.26626	524.897	1	2	3	6	7938.8	390.433	8719.66
BDB-000035541	02281200	SOFL	1998-08-02	26.4726	-80.4456	5.07262	15.5602	7.50608	0.497533	0.0274386	25.0087	3.13779	1116.21	3	4	2	23	12562.8	685.244	61900.4
BDB-000035542	02289034	SOFL	1998-08-12	26.3301	-80.882	4.84751	15.1522	7.25135	0.0153243	0.0507297	25.5676	4.25135	519.838	4	4	3	22	958.44	1022.34	13162.6
BDB-000035597	12112600	PUGT	1998-08-23	47.3123	-122.165	29.7436	-19.6474	7.83381	0.9076	0.0213568	10.4568	11.2386	123.512	24	6	1	6	5172.32	56.2209	168.661
BDB-000035654	05534460	UIRB	2000-07-16	42.1675	-87.829	21.584	6.69783	7.51	0.386	0.073	24	5.315	778	200	7	1	23	11407.9	250.723	24946.9
BDB-000035657	05540260	UIRB	2000-07-13	41.7111	-88.1281	21.0545	6.49542	7.95	5.498	0.882	23.9	7.85	1010	192	10	1	25	107041	738.216	280522
BDB-000035810	05551985	UIRB	2000-07-24	41.705	-88.6526	21.013	6.06409	8.22	8.633	0.03	23.3	11	708	214	11	1	25	391659	9161.61	769575
BDB-000035814	01101500	NECB	2000-08-21	42.5695	-71.027	24.4074	20.1438	6.73081	0.21904	0.0140213	11.5	9.1768	287.88	15	4	6	9	67419.4	16388.1	6223.33
BDB-000035819	01102345	NECB	2000-08-21	42.4695	-71.007	24.3037	20.1887	7.28371	0.575477	0.0144889	11.8083	9.7925	481.083	9	6	7	9	7996.92	861.736	1723.47
BDB-000035824	01072540	NECB	2000-08-22	43.4058	-70.8507	25.3466	20.0384	6.62	0.05	0.01	11.1	13.15	60	91	4	2	1	19539.8	162.561	32.5121
BDB-000035829	01072650	NECB	2000-08-22	43.3176	-70.7389	25.2751	20.1512	6.85	0.063	0.01	12.65	12.05	83.5	43	7	5	4	29827.2	524.203	419.362
BDB-000035946	01110000	NECB	2000-08-16	42.2304	-71.7109	23.8975	19.7003	7.17667	0.141	0.01	17.3667	7.92	447	108	7	6	6	40124.9	1469.36	15032.7
BDB-000035951	01096710	NECB	2000-08-16	42.3294	-71.63	24.0214	19.7364	7.30667	2.17986	0.226571	17.6333	8.97556	598.778	85	13	2	11	52200.8	324.228	21561.2
BDB-000035980	05474000	EIWA	1996-08-11	40.7537	-91.2771	19.8116	3.95317	8.04769	6.1973	0.129405	13.9308	10.0487	489.308	162	4	1	24	9769.79	4884.9	454296
BDB-000035993	05456510	EIWA	1997-08-26	43.6736	-93.0199	23.0159	2.39264	7.585	6.569	0.0155	20.8	7.65	684	360	8	2	19	9912.45	2535.74	24550.6
BDB-000035994	05462770	EIWA	1997-08-18	42.5875	-92.8105	21.809	2.60144	8.02	8.9245	0.028	17.85	9.3	625	286	10	1	26	127334	987.081	364233
BDB-000036026	03185400	KANA	1997-06-30	37.9551	-81.0765	17.5951	12.9356	7.83679	0.554036	0.0138214	13.201	10.0638	141.797	319	10	1	12	25534.1	141.855	10639.2
BDB-000036084	06795500	CNBR	2003-07-21	41.526	-97.2816	20.5852	-1.0615	8.06117	3.77002	0.205182	15.6463	8.192	551.417	440	2	1	29	13080.5	1308.04	236102
BDB-000036169	04211820	LERI	1998-08-09	41.7553	-80.9484	21.8167	12.3742	7.67029	0.375545	0.0165758	11.6397	10.3671	279.171	222	9	1	19	47216.5	30835.3	109369
BDB-000036213	412829097405601	CNBR	2003-07-22	41.4748	-97.6826	20.5331	-1.39459	7.335	4.898	0.2455	15.355	7.11	520.5	474	8	1	25	145357	1562.98	237573
BDB-000036277	14203750	WILL	1995-08-10	45.6434	-123.37	28.2248	-21.053	7.54167	0.203435	0.0169565	8.55083	10.9943	60.9958	315	6	1	3	6744.12	1059.79	963.445
BDB-000036992	01660350	PODL	1994-08-22	38.4851	-77.4914	18.7239	15.8926	7.1	0.16	0.01	21	9.2	86	64	10	3	7	134152	9359.43	7972.85
BDB-000036998	01656870	PODL	1994-08-23	38.8823	-77.47	19.1643	15.8245	7	0.48	0.05	20	7.8	261	70	13	1	24	291952	16219.6	900186
BDB-000036999	01656772	PODL	1994-08-23	38.7818	-77.4867	19.051	15.8323	7.6	1.5	0.08	23.5	7.5	384	51	11	3	25	5584.31	647.455	28569
BDB-000037000	01658500	PODL	1994-08-22	38.5873	-77.4286	18.8469	15.9236	6.5	0.054	0.01	19	7.8	49	74	9	9	25	39885.6	38854	55014.5
BDB-000037003	01643705	PODL	1994-08-25	38.9309	-77.8097	19.1617	15.5276	6.7	0.99	0.02	17	8.6	116	128	10	1	23	339833	1020.52	191858
BDB-000037114	412258098433301	CNBR	2003-07-26	41.3827	-98.7259	20.4502	-2.26206	7.76	0.9345	0.377	19.38	7.045	627.5	589	8	1	39	20633.2	793.582	385681
BDB-000037157	06719505	SPLT	1994-08-10	39.753	-105.235	18.9732	-7.82989	7.79697	0.247273	0.0106061	6.96176	10.7455	225.382	1748	3	1	4	229210	913.187	5022.53
BDB-000037349	01360500	HDSN	1993-08-03	42.507	-73.5065	23.8394	18.1998	7.644	0.5	0.01	17.195	9.45143	161.025	174	4	1	5	1.03545e+06	3486.36	31377.3
BDB-000037354	01361550	HDSN	1993-08-04	42.4362	-74.1324	23.6441	17.7206	7.65	0.196667	0.01	17.0386	9.17167	155.957	240	10	1	11	446930	1056.57	62337.7
BDB-000037360	01374987	HDSN	1993-08-10	41.2287	-73.7436	22.4032	18.3434	7.635	0.6025	0.03	16.6975	8.96429	333.75	63	14	1	24	130966	406.727	65483.1
BDB-000037363	01364970	HDSN	1993-08-12	41.9079	-74.4357	23.0122	17.612	6.31	0.3025	0.0125	11.8713	9.98857	27.35	665	4	3	4	81786.9	31114.6	62229.2
BDB-000037425	08062500	TRIN	1995-08-29	32.4265	-96.463	10.3939	-0.433147	7.75769	4.5712	0.7016	20.5192	7.82308	513	100	1	1	28	27473.7	5494.73	717063
BDB-000037426	08065350	TRIN	1995-08-30	31.3385	-95.6563	9.18146	0.325855	7.69333	2.962	0.359061	23.1212	7.53636	464.303	57	2	2	28	63866.4	135102	1.05871e+06
BDB-000037509	01640155	PODL	1994-08-30	39.5376	-77.1708	19.9345	15.9321	7.4	3.3	0.01	19	9.6	262	135	5	1	19	666841	26673.6	1.47772e+07
BDB-000037512	01659000	PODL	1994-08-22	38.5662	-77.4297	18.8235	15.9273	6.4	0.05	0.01	19	9.1	39	67	6	9	17	4751.49	72670	7825.98
BDB-000037519	01649200	PODL	1994-08-29	39.0212	-76.9455	19.4054	16.2355	7.2	2.1	0.01	17.5	9.9	186	33	5	1	7	272054	1486.63	26759.4
BDB-000037522	01650900	PODL	1994-08-29	38.9832	-77.0003	19.3543	16.1979	7.6	1.4	0.02	21	9.5	318	44	7	1	15	611627	7324.87	725162
BDB-000037526	01611130	PODL	1995-08-08	39.2176	-78.6803	19.3388	14.7347	7.4	0.43	0.01	20	7.4	130	422	9	3	13	85446.7	3040.81	16116.3
BDB-000037534	01620500	PODL	1995-08-13	38.336	-79.2392	18.2807	14.4376	6.7	0.09	0.01	18.5	8.1	29	659	5	2	2	2.28058e+06	33258.4	14253.6
BDB-000037567	04178000	LERI	2003-08-20	41.3856	-84.8016	20.9679	9.27226	7.85281	1.73946	0.0450562	12.0853	8.97588	546.73	245	12	1	17	31625.4	187.873	4947.33
BDB-000037595	0209051600	ALBE	1994-08-28	35.6924	-77.9058	15.583	16.1333	6.57778	1.73333	0.12	17.6333	6.66889	176.889	26	2	3	24	5983.51	3807.69	122118
BDB-000037596	0209075800	ALBE	1994-08-28	35.6972	-77.8547	15.597	16.1773	6.6	0.2865	0.045	16	8.5	86	23	4	6	32	7912.39	10942.7	41918.8
BDB-000037597	0209062000	ALBE	1994-08-29	35.5943	-77.888	15.4782	16.1697	6.8	0.44	0.07	15	8.4	110	21	5	10	28	3028.1	25115.4	8817.12
BDB-000037598	02090629	ALBE	1994-08-29	35.6024	-77.8311	15.4968	16.2183	6.61	1.20286	0.09	20.14	6.47	184.3	22	6	6	42	51625.3	25389.5	363070
BDB-000037600	0209010900	ALBE	1994-08-30	35.7279	-78.2053	15.5716	15.862	6.9	0.69	0.11	20	6.8	133	46	5	8	38	2143.89	4794.53	8926.4
BDB-000037601	02090519	ALBE	1994-08-30	35.6429	-77.89	15.5313	16.1577	6.59	1.39286	0.16	20.434	5.57	244.8	20	5	3	38	25613.6	15368.1	369689
BDB-000037602	02091000	ALBE	1994-08-30	35.4889	-77.8061	15.3763	16.2645	6.45	0.581667	0.0833333	18.4375	7.68625	91.375	18	2	7	36	932.719	34277.4	80913.3
BDB-000037858	01347194	HDSN	1993-08-10	43.1798	-74.6963	24.3504	17.0867	6.335	0.294667	0.01	14.8486	9.745	33.1143	323	3	3	2	187507	42172.8	11678.6
BDB-000037860	01342800	HDSN	1993-08-11	43.3965	-74.8593	24.5572	16.9047	6.3425	0.363333	0.01	15.38	9.12	25.6286	420	4	14	6	17606.4	43689.9	6520.88
BDB-000038094	07283000	MISE	1998-08-30	33.9736	-89.3478	12.3333	6.0969	6.54236	0.104407	0.0168148	14.5691	10.2211	121.222	80	4	3	42	11927.9	2385.59	94339.2
BDB-000038103	09010500	UCOL	1998-08-02	40.3258	-105.857	19.6644	-8.28846	7.31859	0.0804737	0.0104211	4.34375	9.2125	64.2302	2673	8	3	4	8307.68	209.437	349.062
BDB-000038443	01372051	HDSN	1993-07-26	41.7101	-73.9262	22.8924	18.0716	7.76605	0.35125	0.0166667	13.517	10.4645	515.125	48	11	2	27	916007	24891.5	761680
BDB-000038493	05288475	UMIS	1997-08-15	45.2083	-93.3341	24.7176	2.09249	7.9	0.777	0.015	13.4	9.5	519	262	7	1	36	60930.2	1874.78	134046
BDB-000038749	01438890	DELR	2001-08-27	41.2312	-74.9099	22.1866	17.3978	7.07667	0.134	0.019	17.37	9.14	93.3333	226	5	1	0	79958.1	669.665
BDB-000038756	01438712	DELR	2001-08-27	41.3054	-74.851	22.2784	17.4273	7.06667	0.0345	0.019	20.41	8.765	112.667	249	6	3	9	124810	891.5	2674.5
BDB-000038761	01451800	DELR	2001-08-13	40.6618	-75.6269	21.4345	16.9513	7.92205	3.42919	0.0151389	12.8042	12.362	191.231	119	7	1	11	499031	6186.34	131975
BDB-000038874	05082625	REDN	1997-08-13	47.9383	-97.5004	27.7218	-1.13001	8.07702	0.502639	0.103916	11.2719	10.1588	941.1	295	7	1	26	41660.3	4166.03	588799
BDB-000039126	401303076562001	LSUS	1994-07-13	40.2176	-76.9386	20.7204	15.9742	7.33667	6.45	0.025	14.5	8.43	651	115	13	1	18	152511	571.202	78254.8
BDB-000039430	01438396	DELR	2001-08-28	41.319	-74.8024	22.3021	17.4633	6.93333	0.436	0.014	13.57	10.625	169.667	135	6	1	4	185289	3746.65	2384.23
BDB-000039436	01435000	DELR	2001-08-15	41.8901	-74.5899	22.9644	17.4926	6.45346	0.1916	0.00864294	10.36	11.3716	28.3704	467	12	6	13	27656.5	4707.48	1863.38
BDB-000039567	01467150	DELR	2001-08-05	39.9031	-75.0214	20.7147	17.6331	7.00293	0.333538	0.0185944	14.297	10.1176	267.024	5	12	5	34	14231	8846.29	93078.4
BDB-000039750	441451123170903	WILL	1994-07-25	44.2473	-123.287	26.7163	-21.4307	7.2	0.16	0.01	16.2	9.4	61.5	94	6	4	17	256342	8244.92	95191.3
BDB-000039751	442223123153703	WILL	1994-07-24	44.3729	-123.261	26.8447	-21.3716	7.36	0.7825	0.015	18.7083	9.97	105.467	79	12	2	14	271491	10736.9	371191
BDB-000039752	442107123082903	WILL	1994-07-25	44.3518	-123.143	26.7955	-21.2875	7.005	1.4	0.06	20.7	6.66	121.5	84	6	3	39	69840.7	6285.66	252125
BDB-000039756	451138122431702	WILL	1994-07-26	45.1937	-122.723	27.6027	-20.7068	7.305	8.65	0.07	12.21	10.18	248.5	34	8	2	33	237310	3273.23	561360
BDB-000039758	445322122475303	WILL	1994-07-28	44.8893	-122.799	27.294	-20.8589	7.48	1.2	0.01	20.6	8.74	44.3	194	1	7	11	68277.9	25988.1	5197.62
BDB-000039897	391852084253100	WHMI	2001-07-29	39.3134	-84.4265	18.7011	9.86337	7.74	0.326	0.073	23.9	9.02	902	179	8	1	20	136500	1587.21	803127
BDB-000039918	400134084400300	WHMI	2001-07-17	40.0261	-84.6675	19.4693	9.56392	7.77	0.458	0.02	21.6	6.9	600	316	7	1	10	177291	1197.91	63489.2
BDB-000040040	05317170	UMIS	1997-08-12	44.2386	-94.435	23.6188	1.2463	8.2	4.556	0.086	18.75	8.85	785	279	8	1	19	64708.7	7279.73	363986
BDB-000040228	442108123082403	WILL	1994-07-25	44.3521	-123.141	26.7955	-21.2864	8.17	0.054	0.03	23.685	8.975	156	85	7	3	34	158982	19335.7	472649
BDB-000040288	05575850	LIRB	1997-08-07	39.6962	-89.5726	18.7133	5.45805	7.4	0.177	0.145	18.5	1.8	654	167	6	1	39	16337.5	363.055	24143.2
BDB-000040366	05318630	UMIS	1997-08-14	44.0508	-94.6658	23.4066	1.06542	8.07	5.7	0.035	18.5	8.55	824	320	4	1	25	4193.98	279.599	83320.5
BDB-000040371	13094000	USNK	1993-07-18	42.6658	-114.712	23.3493	-15.1493	8.38803	1.30041	0.0557627	11.0477	9.95667	565.831	909	5	1	22	142071	9471.41	1.17446e+06
BDB-000040930	05586598	LIRB	1997-08-06	39.3598	-90.496	18.2878	4.69672	7.7	2.154	0.06	20.5	5.9	614	135	7	1	37	19612.1	1225.75	338308
BDB-000041030	01442550	DELR	2001-08-26	41.0693	-75.14	21.9678	17.2505	7.15	0.2125	0.0195	14.485	9.765	87.9667	195	5	2	3	102095	1623.42	541.139
BDB-000041099	08048543	TRIN	1995-07-11	32.7518	-97.2895	10.7637	-1.20126	8.11562	0.193	0.0215625	21.9906	9.32759	451.031	157	4	1	26	10446	144.083	22188.8
BDB-000041104	08066295	TRIN	1995-07-26	30.4619	-94.723	8.21444	1.22392	5.93929	0.0922857	0.0117857	19.6071	7.60357	60.5	35	3	7	28	2377.68	6736.75	218350
BDB-000041478	02089500	ALBE	2006-07-17	35.2578	-77.5856	15.1604	16.509	6.90187	0.633264	0.0421559	18.8197	8.09889	132.758	9	11	6	37	10289	2271.6	46233.7
BDB-000041479	02091500	ALBE	2006-07-16	35.4289	-77.5825	15.3489	16.4748	6.664	0.619095	0.0654782	18.8625	6.918	106.551	8	7	6	29	7525.85	10009.4	23857
BDB-000041525	040853145	WMIC	2004-08-30	44.3372	-87.7454	24.0033	6.55601	7.93	2.06	0.110167	13.7778	10.8189	681.444	223	10	1	18	2.60972e+06	22497.6	562439
BDB-000042072	05532500	UIRB	2004-07-20	41.8223	-87.8209	21.1997	6.73762	7.88763	4.77539	0.733316	14.6639	10.183	1104	183	7	1	26	57453.2	1336.12	614616
BDB-000042076	05553500	LIRB	2004-07-11	41.3423	-88.8467	20.5959	5.93467	8.04745	4.60427	0.345711	17.5305	10.468	770.67	139	4	1	21	194330	7066.54	985782
BDB-000042236	393944084120700	WHMI	2004-07-19	39.6623	-84.2019	19.1126	10.0054	8.14465	1.0355	0.0183388	14.0833	10.7385	843.468	234	11	1	21	231344	1502.23	347016
BDB-000042535	08012150	ACAD	2006-08-09	30.19	-92.5906	7.96312	3.27791	7.30641	0.240884	0.0912383	21.4532	4.03885	232.924	1	4	5	31	50327	19242.7	233132
BDB-000042784	04087030	WMIC	2004-08-23	43.1728	-88.104	22.6845	6.37968	7.98857	1.18	0.0396	12.6057	10.8486	1031.71	233	12	1	14	429844	1666.06	469829
BDB-000042786	055437901	WMIC	2004-08-24	43.1075	-88.172	22.6073	6.33081	7.6925	0.8565	0.0085	18.77	6.9775	969.25	253	13	1	27	617682	3539.73	274329
BDB-000042893	08051500	TRIN	2007-08-05	33.3362	-97.1795	11.4146	-1.09069	8.00213	0.252265	0.0188738	17.7195	9.16165	528.754	183	4	1	14	862.32	53.8949	12611.4
BDB-000042937	07379960	ACAD	2004-08-26	30.3824	-91.0943	8.23942	4.70437	7.40882	0.284037	0.296361	21.6067	4.39453	349.3	6	4	1	20	56932.6	6642.14	404222
BDB-000042961	390948085274301	WHMI	2004-08-09	39.1635	-85.4621	18.4314	9.00317	7.855	2.9525	0.0415	22.135	7.51	390	246	11	1	23	178100	947.34	261466
BDB-000043312	04084429	WMIC	2004-08-27	44.2586	-88.4618	23.8687	5.99522	7.7875	0.5635	0.0371667	13.2437	9.695	1150.5	230	11	1	34	193766	13677.6	353338
BDB-000043325	08012470	ACAD	2004-08-30	30.07	-92.8789	7.82047	3.00521	7.22588	0.148114	0.0590571	21.5893	4.63357	273.663	0	3	5	41	20221.6	2112.7	100806
BDB-000043455	01104615	NECB	2006-08-15	42.3648	-71.1898	24.1519	20.0746	7.12026	0.601814	0.0164035	13.4131	9.34514	424.629	1	11	2	15	28460.8	1719.11	21202.3
BDB-000044373	400810105071301	SPLT	2003-07-06	40.1361	-105.12	19.391	-7.69157	8.05	0.7775	0.0185	17	8.99	649.5	1516	7	1	18	77724.4	179.088	16476.1
BDB-000044689	01102500	NECB	2004-08-02	42.4473	-71.1389	24.2517	20.091	7.08876	1.40716	0.0131797	13.2129	8.50015	632.735	4	4	6	14	49599.7	1760.93	11446.1
BDB-000045048	07030392	MISE	2004-08-01	35.0326	-89.2467	13.521	6.10527	6.22331	0.220295	0.0144746	16.3658	8.27864	35.9024	114	1	4	45	191.561	1053.58	45974.6
BDB-000045057	01095220	NECB	2004-08-03	42.4109	-71.7912	24.0762	19.5857	6.54373	0.173792	0.0142394	10.2514	9.90083	130.77	122	7	7	10	51053.4	27061.1	7532.46
BDB-000045926	01493500	PODL	2004-06-30	39.28	-76.0146	19.8519	16.9567	6.73427	2.35363	0.0346625	16.4595	7.42436	163.717	5	5	3	41	253.371	90.4897	5628.47
BDB-000046096	11303500	SANJ	2004-08-19	37.676	-121.266	19.1817	-21.8149	7.87981	1.44102	0.112318	16.471	10.1032	614.371	8	8	1	32	33286.7	640.128	97299.6
BDB-000046943	01464907	DELR	2008-08-26	40.2293	-75.1196	21.0533	17.4722	7.87615	1.27725	0.0855037	14.9173	10.6873	531.88	60	13	1	24	34467.6	135.167	37846.8
BDB-000047663	05465500	EIWA	2005-08-07	41.1781	-91.1821	20.2903	4.00853	8.2184	5.3623	0.097692	14.7816	10.1586	517.138	176	1	1	17	234475	2791.37	34194.3
BDB-000048109	03357330	WHMI	2009-08-09	39.8162	-86.7533	19.0445	7.83265	8.07115	2.92291	0.0256368	14.9313	10.1455	574.907	241	8	1	27	163536	2703.08	544670
BDB-000048367	05288705	UMIS	2008-08-24	45.05	-93.3102	24.5421	2.11622	7.47158	0.351264	0.0195069	13.0147	6.92975	1115.51	256	12	2	29	51961.3	1165.05	69903.1
BDB-000048484	03374100	WHMI	2005-08-16	38.4898	-87.55	17.501	7.29166	8.00781	1.64506	0.04301	19.3719	9.62443	493.77	115	2	2	12	204649	3766.55	23227.1
BDB-000048567	04186500	LERI	2006-08-08	40.9487	-84.2661	20.5359	9.77375	7.99455	4.4895	0.0826522	13.6079	9.59927	719.159	221	4	1	15	257601	1022.22	240223
BDB-000048950	402114105350101	SPLT	2006-07-26	40.3539	-105.584	19.6722	-8.05693	6.9923	0.132429	0.00856888	5.58099	9.825	23.118	2444	4	3	6	512483	39421.7	15017.8
BDB-000048954	07288650	MISE	2006-07-31	33.3967	-90.8478	11.6043	4.75859	7.35866	0.655492	0.0648917	21.6897	7.04897	335.764	29	2	2	30	84011.6	19281.3	714787
BDB-000049323	07288955	MISE	2006-08-01	32.4442	-90.9142	10.5397	4.75418	6.88738	0.42406	0.0495962	20.9123	6.70813	146.144	15	2	1	19	20235.4	2248.38	273740
BDB-000049460	01403900	LINJ	2009-07-28	40.585	-74.5081	21.5556	17.8859	7.34834	0.935379	0.0242157	14.4009	9.5835	474.507	12	15	1	29	60755.1	552.318	147469
BDB-000049463	01472157	DELR	2009-08-03	40.1515	-75.6013	20.8806	17.094	7.60372	1.1757	0.0187826	13.1723	11.1808	159.102	50	10	1	11	107542	273.644	13955.9
BDB-000049464	05531500	UIRB	2009-08-03	41.8259	-87.9006	21.1981	6.67176	7.79162	6.71693	1.22906	15.7608	9.98559	1245.91	195	15	1	40	26210.3	115.463	36602
BDB-000049663	08014500	ACAD	2009-08-03	30.6988	-92.8932	8.51794	2.96859	6.74873	0.0715667	0.0178	19.4243	8.47	48.1425	15	9	6	37	20869.1	7503.51	89338.6
BDB-000049675	04161820	LERI	2009-08-05	42.6145	-83.0266	22.5166	10.5464	8.08675	1.44505	0.0232307	12.4859	10.233	922.516	184	17	2	29	151513	2154.21	158693
BDB-000049716	08057410	TRIN	2006-07-25	32.7076	-96.7358	10.709	-0.685894	7.54775	6.42856	0.934238	21.8338	7.98957	593.297	119	4	1	43	15742.6	1124.47	140840
BDB-000049726	12510500	CCYK	2005-08-29	46.2535	-119.478	28.079	-17.9599	8.05987	0.825708	0.0674839	14.2059	10.7852	211.51	142	11	1	10	97536.9	1108.37	49876.8
BDB-000049973	12505450	CCYK	2008-08-20	46.3435	-120.187	28.3115	-18.4655	8.0609	3.36008	0.116556	14.811	9.26123	433.697	221	10	1	36	247492	3055.45	1.39634e+06
BDB-000050017	11273500	SANJ	2009-08-17	37.351	-120.962	18.7605	-21.6528	7.48024	1.41317	0.0466738	16.8874	9.26834	158.788	21	8	1	20	49649.9	1712.06	253386

## Sheet: Facilitative mode
Sample ID	Station ID	Study Unit	Collection date	Latitude (degrees)	Longitude (degrees)	Projected latitude (km x 100)	Projected longitude (km x 100)	pH	NO2+NO3 (mg/L)	PO4 (mg/L)	Water temperature (°C)	Dissolved oxygen (mg/L)	Specific conductance (µS/cm)	Elevation (m)	N-fixer guild richness	Motile guild richness	Low profile guild richness	N-fixer guild density (cells/cm^2)	Motile guild density (cells/cm^2)	Low profile guild density (cells/cm^2)
BDB-000025688	12352500	NROK	1999-08-11	46.8319	-114.054	27.7999	-13.7473	7.8425	0.0335357	0.00382143	11.2856	10.8263	106.906	956	1	1	6	1518.83	1518.83	189854
BDB-000025699	12334550	NROK	1999-08-10	46.826	-113.814	27.7591	-13.5682	8.13839	0.046	0.00846154	9.20677	10.9171	316.552	1013	1	6	7	32468.3	15094.9	102532
BDB-000025704	12354500	NROK	1999-08-24	47.3019	-115.087	28.4631	-14.4201	8.05929	0.04625	0.00433333	9.98	11.1693	208.625	805	2	8	5	24053	67503.6	177682
BDB-000029007	383103106594200	UCOL	1996-08-16	38.5175	-106.996	17.7565	-9.47608	8.15893	0.0662679	0.0140179	7.36607	9.52143	211.143	2308	2	11	8	1157.98	44582.3	181224
BDB-000031218	11060400	SOCA	2000-08-11	34.0783	-117.3	14.4144	-19.3489	8.25517	0.656308	0.0346096	21.1824	10.0074	656.552	299	1	3	4	3087.82	882.234	103663
BDB-000031532	05079000	REDN	1994-08-04	47.7755	-96.6095	27.5347	-0.460225	8.02238	0.325773	0.0421818	12.313	9.86636	402.739	260	1	21	13	134.066	5228.56	9217.01
BDB-000031534	05078500	REDN	1994-08-05	47.8875	-96.2739	27.6571	-0.206487	8.13	0.42	0.09	21	7.69	537	293	2	13	10	639.582	33418.2	41093.2
BDB-000031908	06790500	CNBR	1993-08-21	41.2633	-98.4492	20.3103	-2.03597	8.3145	0.420686	0.0748571	14.285	10.805	250.65	537	1	20	6	2323.89	1.12941e+06	34858.4
BDB-000032445	08251500	RIOG	1994-08-17	37.0783	-105.757	16.0355	-8.57766	8.35429	0.0930645	0.0387097	13.4457	9.19656	354.771	2271	1	12	7	231181	32652.7	13714.1
BDB-000032462	08331000	RIOG	1995-08-31	34.9059	-106.685	13.706	-9.66346	7.99531	0.841887	0.238113	15.2359	7.67969	404.397	1489	1	20	7	1452.6	80619.3	53746.2
BDB-000032504	06214500	YELL	2000-08-21	45.8	-108.467	25.9812	-9.67302	8.15447	0.167632	0.0164474	11.0139	10.8823	305.694	938	2	10	5	437298	1.501e+06	1.3119e+06
BDB-000032506	06279500	YELL	2000-08-27	44.7586	-108.181	24.8039	-9.60049	8.09291	0.413087	0.0152648	12.6283	10.1502	813.455	1111	1	26	8	3379.27	706268	312583
BDB-000032645	06308500	YELL	2000-08-26	46.3456	-105.803	26.3411	-7.55208	8.2	0.05	0.01	20.5	8.3	902	731	2	29	8	6951.93	685924	537616
BDB-000032646	06309000	YELL	2000-08-25	46.4217	-105.861	26.4297	-7.58769	8.5	0.05	0.01	21	7.6	689	710	1	30	7	3932.52	15956.9	17998.8
BDB-000032647	06326530	YELL	2000-08-26	46.8047	-105.294	26.808	-7.11122	8.5	0.05	0.01	23.5	8.4	703	658	2	22	8	1831.27	51962.3	38227.8
BDB-000033918	472304115235900	NROK	2000-08-23	47.3844	-115.401	28.6003	-14.6351	7.34	0.012	0.003	15.04	8.85	59	958	1	1	4	43.5791	43.5791	2135.4
BDB-000034573	11384200	SACR	1998-08-05	39.7271	-121.863	21.5345	-21.6998	7.995	0.05	0.02	21.27	9.015	188.5	55	1	8	7	4278.69	18490	39272.2
BDB-000034574	11384004	SACR	1998-08-10	39.7668	-121.779	21.5583	-21.6192	8.39	0.05	0.01	21.58	9.455	181.5	86	2	7	6	19575.1	3960.28	20254
BDB-000034575	11383500	SACR	1998-08-12	40.014	-121.948	21.8636	-21.6827	8.0925	0.05	0.01	16.9	9.61	126.5	161	2	10	7	4375.31	11324.3	15442.3
BDB-000034576	395627122034901	SACR	1998-08-11	39.9407	-122.065	21.8111	-21.7997	8.4	0.063	0.014	30.7	9.2	196	59	1	13	7	937.02	1620.79	8610.45
BDB-000034739	12354000	NROK	2000-08-24	47.2969	-115.123	28.4631	-14.4475	7.74	0.008	0.003	13.55	9.53	93	811	2	3	7	481.799	222.368	3187.29
BDB-000035596	12103380	PUGT	1998-08-31	47.1818	-121.389	29.4461	-19.1164	7.58	0.060625	0.0132083	7.18462	11.916	42.6154	633	1	3	7	248.608	546.938	8402.96
BDB-000035833	404519111334801	GRSL	2000-08-22	40.7553	-111.563	20.7799	-12.9737	8.305	0.148	0.016	11.35	10.3	1009	1913	1	12	10	8258.21	197371	220494
BDB-000036596	394524104504901	SPLT	1993-08-31	39.7567	-104.847	18.9459	-7.5017	7.9	1.6	0.06	14.8	10	1353	1621	1	14	4	71026.3	5.81232e+06	875991
BDB-000037353	01361500	HDSN	1993-08-05	42.4045	-74.1515	23.6061	17.7134	7.838	0.08775	0.01	20.1875	9.20143	162.975	192	3	14	12	53490.2	74063.4	275680
BDB-000037362	01373690	HDSN	1993-08-12	41.3668	-74.1043	22.4846	18.0161	7.67	0.596667	0.0133333	15.5029	9.56833	604.143	117	1	24	14	898.177	70506.9	140116
BDB-000037364	01350196	HDSN	1993-08-13	42.4717	-74.4607	23.6221	17.4502	7.2675	0.125667	0.0133333	16.4514	9.25833	98.3	258	2	9	9	25061.9	10024.7	249366
BDB-000037500	01348058	HDSN	1993-08-09	43.0081	-74.6749	24.1673	17.1462	7.935	0.176667	0.0133333	15.9029	9.99833	227.857	161	1	3	8	1886.42	7545.68	1.07903e+06
BDB-000037508	01640000	PODL	1994-08-31	39.5612	-77.0436	19.9819	16.0331	7.5	6.3	0.25	21	8.7	496	169	1	16	5	4874.7	623962	365603
BDB-000038494	05288487	UMIS	1997-08-16	45.1839	-93.2969	24.6912	2.12247	7.9	1.365	0.012	12.6	9.6	689	265	3	31	9	2606.37	148042	58382.9
BDB-000039336	465537116422500	CCYK	1995-08-09	46.9268	-116.708	28.3143	-15.7155	7.65	0.05	0.02	17.15	8.8	62	787	1	12	7	3661.06	76882.2	81458.5
BDB-000039645	05319050	UMIS	1997-08-19	43.9791	-94.5139	23.3285	1.18801	8.24	1.636	0.01	18.8	10.21	735	311	1	35	9	69.9834	10602.5	2519.41
BDB-000039681	13346000	CCYK	1993-08-25	46.9207	-117.319	28.4101	-16.1729	8.70571	0.474087	0.0378261	17.5107	9.91714	118.179	613	1	4	5	271.459	2443.14	13573
BDB-000039682	465950117371000	CCYK	1993-08-26	46.9971	-117.62	28.5442	-16.3787	8.36667	0.117667	0.286667	19.5333	8.16667	256.667	485	1	16	6	677.182	49434.3	48757.2
BDB-000040037	05318050	UMIS	1997-08-20	43.5858	-93.848	22.9	1.73014	8.1	3.249	0.054	18.72	8.22	594	341	1	30	7	450.332	67775	13735.1
BDB-000040038	05318240	UMIS	1997-08-14	43.7669	-94.3827	23.0935	1.29683	8.21	2.093	0.011	20.82	8.52	591	335	1	31	9	73.1564	6389	1463.13
BDB-000040289	05580000	LIRB	1997-08-14	40.2548	-89.1293	19.3639	5.78868	7.9	0.688	0.02	20.6	7.4	589	195	1	42	9	58.7796	13401.8	2703.86
BDB-000040827	13056500	USNK	1993-08-17	43.8258	-111.905	24.2122	-12.684	7.92115	0.196865	0.0121967	9.7037	9.26173	179.241	1469	1	9	6	718.994	25164.8	21569.8
BDB-000040832	13152500	USNK	1993-08-26	42.8864	-114.803	23.6054	-15.1735	8.47231	0.328763	0.0363158	11.6537	10.2308	373.366	1024	1	10	6	50.7878	2590.18	24886
BDB-000040846	13027500	USNK	1995-08-21	43.0797	-111.037	23.277	-12.1292	8.09086	0.798421	0.0144737	8.63333	10.1486	467.171	1734	1	8	7	9689.16	721842	1.21115e+06
BDB-000040848	13120500	USNK	1995-08-29	43.9796	-114.055	24.6868	-14.3468	8.15216	0.0553611	0.0102778	6.08205	10.2508	169.469	2017	1	11	8	51.558	876.495	6083.95
BDB-000041236	12472190	CCYK	2003-08-29	46.8957	-119.304	28.7365	-17.6566	8.71667	0.0633333	0.013	19.8333	10.67	277.333	233	4	9	6	316945	610120	3.19323e+06
BDB-000041279	12471400	CCYK	2003-08-28	47.0054	-119.15	28.8259	-17.5132	8.2642	2.95896	0.0553816	12.695	10.5421	384.97	322	2	19	7	8544.81	1.24327e+06	534051
BDB-000041285	12472940	CCYK	2003-08-28	46.7383	-119.604	28.6236	-17.9218	8.89	0.358	0.018	22.15	8.76	304	202	1	22	8	6520.38	226583	79874.6
BDB-000041504	06926900	OZRK	2006-08-10	38.3337	-91.993	17.0748	3.46868	7.82	0.1955	0.020595	20.825	8.075	332.75	195	1	5	10	18949.6	92041	234163
BDB-000042677	461517119402500	CCYK	2003-08-21	46.2547	-119.675	28.1176	-18.1069	8.214	1.07775	0.029	19.02	8.914	298.2	229	1	18	9	1084.24	160467	287323
BDB-000042735	10350500	NVBR	2006-08-28	39.5655	-119.486	20.8405	-19.7926	7.95933	0.187226	0.0272857	12.7985	10.0278	248.54	1284	2	21	7	4228.7	254568	71042.2
BDB-000042867	465647120265700	CCYK	2003-08-13	46.9463	-120.45	29.0088	-18.4921	7.984	1.6758	0.1498	13.654	9.488	346.24	458	1	19	8	125.048	15693.5	11316.9
BDB-000042872	465708120270500	CCYK	2003-08-14	46.9522	-120.453	29.0156	-18.4922	7.97667	1.74933	0.137667	16.8	8.78333	295.667	461	1	17	8	1139.46	133317	97993.9
BDB-000042935	040870856	WMIC	2004-08-25	43.0428	-88.0795	22.5415	6.41147	7.958	0.736	0.02	20.388	8.032	1283.6	226	1	25	12	2186	118773	285637
BDB-000043019	12508400	CCYK	2003-08-22	46.2523	-120.398	28.255	-18.649	8.47	0.33	0.0995	23.1	8.73	110	284	2	21	8	60605.8	72335.9	39752.2
BDB-000043228	12484550	CCYK	2003-08-13	46.8573	-120.497	28.9228	-18.552	8.30286	0.0538333	0.0835	20.5	8.44857	201.571	436	1	19	8	344310	491183	433397
BDB-000043584	12483940	CCYK	2003-08-15	47.0155	-120.475	29.0878	-18.4909	7.915	0.566	0.144	20.1	7.87	166	525	1	29	7	841.686	147295	29459
BDB-000043592	12509698	CCYK	2003-08-21	46.2574	-119.711	28.1275	-18.1336	8.03333	0.803333	0.0493333	17.9333	8.30667	316.333	250	1	12	7	5418.06	559866	343144
BDB-000043778	12472515	CCYK	2003-08-27	46.8747	-119.598	28.7689	-17.8802	8.875	1.792	0.1	23.1	11.45	381	208	2	15	8	14429.7	121621	333943
BDB-000043786	12508480	CCYK	2003-08-22	46.2537	-120.408	28.2583	-18.6557	8.435	0.33	0.1005	26.1	9.62	173	294	4	17	7	153183	267088	68081.2
BDB-000043883	12473190	CCYK	2003-08-27	46.6774	-119.415	28.5227	-17.7979	8.395	0.1045	0.019	22	8.785	549.5	209	3	12	14	14908.1	62472.1	298872
BDB-000043933	461315119452400	CCYK	2003-08-26	46.2208	-119.758	28.097	-18.1785	8.28	1.46833	0.109	20.9333	9.69333	331	200	2	19	10	3942.84	107583	149828
BDB-000044857	13351000	CCYK	2004-08-11	46.7585	-118.149	28.3793	-16.8328	8.41199	2.09831	0.090752	11.1365	10.9099	275.792	325	1	19	9	294.284	34725.6	18392.8
BDB-000046252	08181800	SCTX	2004-08-10	29.2222	-98.3558	6.85949	-2.29182	7.92179	9.26788	0.965161	23.3979	7.42556	852.263	121	1	28	3	2130.91	117413	2983.27
BDB-000046634	09095300	UCOL	2004-08-31	39.3747	-108.318	18.8489	-10.4854	8.47592	0.572704	0.0178493	10.2411	9.71918	2683.65	1651	2	22	5	12712.1	572044	69338.6
BDB-000047375	08178800	SCTX	2009-08-13	29.3572	-98.4128	7.01038	-2.34341	7.74553	0.76553	0.0545321	21.6277	6.61921	720.22	167	2	31	9	3758.42	45710.5	7415.26
BDB-000048176	04063700	WMIC	2009-08-26	45.7636	-88.4632	25.5379	5.86144	7.45034	0.105869	0.012486	9.18178	9.64893	169.294	433	1	16	16	1008.47	38322	278339
BDB-000049642	13092747	USNK	2008-08-04	42.5666	-114.499	23.2067	-15.0008	8.07247	1.73734	0.0448785	11.0843	9.24204	631.414	1106	1	14	8	1242.34	262134	114295
BDB-000050022	340843117032501	SOCA	2009-08-11	34.1453	-117.058	14.4383	-19.1159	8.26667	0.05	0.01	19	8.31333	252.667	826	1	16	12	232.728	16989.2	42472.9
BDB-000031169	471931095564601	REDN	1994-07-18	47.3252	-95.9464	27.0359	0.0407295	7.6	0.2	0.07	24.2	6.3	437	366	1	14	8	671.141	65100.7	73825.6
BDB-000031698	08220000	RIOG	1994-07-18	37.6894	-106.461	16.782	-9.11935	7.76176	0.0675667	0.0317857	7.62647	9.01818	82.5441	2435	1	12	6	30.4468	959.08	2024.73
BDB-000032077	08290000	RIOG	1995-07-25	36.0739	-106.112	14.9493	-9.00811	8.15152	0.058	0.0125806	10.3121	9.33939	302.031	1730	1	8	6	613.629	5113.58	50624.4
BDB-000034750	05531045	UIRB	2000-07-14	42.0125	-88.0009	21.3992	6.57179	7.79	7.423	2.076	25.8	9.105	915	211	1	9	10	6545.28	223358	172632
BDB-000036221	06773500	CNBR	2003-07-23	41.3286	-97.6753	20.3694	-1.39144	8.33696	2.65073	0.392533	19.5757	9.59773	628.348	471	2	22	7	5660.49	516520	154248
BDB-000036410	412103098234701	CNBR	2003-07-24	41.3509	-98.3967	20.4072	-1.98984	7.99	1.4725	0.3215	24.075	9.625	573	550	1	38	6	7544.64	540699	50297.6
BDB-000036434	06765500	SPLT	1994-07-25	41.1189	-100.763	20.2218	-3.96615	8.42	1.40771	0.0937143	12.9886	10.3746	1251.79	853	1	15	11	4049.02	400853	287480
BDB-000038416	06753400	SPLT	1994-07-20	40.8983	-104.868	20.2209	-7.39991	8.15556	0.248571	0.0103571	10.9179	9.8	515.393	1729	1	7	6	33035.5	45206.5	133881
BDB-000038527	412546096542001	CNBR	2003-07-21	41.4294	-96.9059	20.4735	-0.751337	7.56	2.7285	0.137	23.78	6.8	241	399	1	46	4	610.813	284029	25043.4
BDB-000038536	412240097205901	CNBR	2003-07-22	41.3779	-97.3502	20.4203	-1.12066	7.625	3.482	0.13	18.7	6.83	574	438	1	17	8	328.484	27921.2	49601.2
BDB-000039753	441430123054803	WILL	1994-07-27	44.2415	-123.098	26.6675	-21.288	7.135	0.79	0.035	17.85	9.205	90.5	99	1	13	5	910.183	102396	17748.6
BDB-000040550	11066460	SOCA	2001-07-26	33.9686	-117.448	14.3251	-19.5086	8.16196	6.72563	0.672406	21.1353	8.3602	811.078	212	1	18	4	1069.6	104606	4920.14
BDB-000041656	13063000	USNK	2007-07-30	42.8156	-111.506	23.0465	-12.5518	8.605	0.016	0.01081	19.855	7.125	270.5	1914	2	18	12	115363	503404	471941
BDB-000042203	13091995	USNK	2007-07-16	42.3246	-114.273	22.9057	-14.8712	8.29333	0.023	0.019595	15.5667	8.47	149	1383	1	14	11	44.5316	5655.55	15853.4
BDB-000044530	400217105123701	SPLT	2003-07-11	40.0381	-105.21	19.289	-7.77787	8.38167	0.173667	0.0155	10.0333	12.0333	422.5	1574	1	5	10	1768.88	10613.3	289212
BDB-000044738	413659104370001	SPLT	2003-07-09	41.6164	-104.617	21.0022	-7.11796	7.90333	0.287667	0.019	8.89	9.73167	368	1583	1	11	13	1668.35	2860.03	17716.3
BDB-000044746	403035105035301	SPLT	2003-07-08	40.5097	-105.065	19.8032	-7.605	8	2.1175	0.019	15.75	8.45	1497.5	1502	1	17	9	2035.76	190343	275845
BDB-000045750	405205099460401	CNBR	2003-07-29	40.868	-99.7681	19.904	-3.14937	8.395	0.1925	0.02	24.375	7.47	785	743	1	37	14	360.139	88954.4	29171.3
BDB-000045756	405041099460501	CNBR	2003-07-29	40.8447	-99.7684	19.8779	-3.15068	8.01	0.1115	0.096	24.045	7.26	699.5	738	1	35	7	450.121	203455	13503.6
BDB-000046125	413850099402301	CNBR	2003-07-28	41.6472	-99.6734	20.7724	-3.03657	8.115	0.1745	0.267	21.61	9.125	393.5	747	1	37	10	495.066	143569	57427.7
BDB-000049209	06324970	YELL	2009-07-06	44.9269	-105.353	24.7377	-7.36143	8.02791	0.0804521	0.0188619	10.07	9.58962	3104.73	1037	3	21	3	131939	220367	2105.41
BDB-000028264	02398001	MOBL	2000-06-07	34.4776	-85.3469	13.2268	9.68829	7.75	0.920333	0.0156667	16.9333	9.01333	281.667	200	1	13	9	44643.2	228796	2.48328e+06
BDB-000030770	05030150	REDN	1994-06-27	46.6427	-95.6045	26.2813	0.303857	7.91458	0.144167	0.0129167	10.9167	7.98217	379.957	407	1	25	8	88.854	3198.74	6693.67
BDB-000030777	05051300	REDN	1994-06-30	46.1522	-96.5792	25.7381	-0.448318	7.9988	0.900731	0.241538	11.3269	8.69826	1105.08	289	1	24	9	345.389	54053.4	18823.7
BDB-000030981	05058700	REDN	1995-06-22	46.4469	-97.6793	26.0751	-1.29388	8.09654	0.3626	0.1392	11.4852	9.6772	850.556	342	1	8	5	162.687	3335.08	38394.1
BDB-000031550	08240000	RIOG	1994-06-29	37.3161	-105.743	16.2993	-8.53823	8.20625	0.12016	0.0532	12.0281	8.2129	456.187	2284	1	10	10	1484.17	133575	58624.6
BDB-000032188	01348995	HDSN	1995-06-27	42.9281	-74.6601	24.0829	17.1778	7.934	0.3725	0.0125	20.2775	8.98857	1031.38	121	1	3	6	65391.2	73565.1	4.4793e+06
BDB-000033484	02423515	MOBL	2000-06-07	33.389	-86.8272	11.8755	8.4638	8.03333	0.352333	0.0153333	21.1333	10.1333	252.167	159	1	9	7	2682.93	320611	397075
BDB-000034023	01349240	HDSN	1995-06-20	42.8526	-74.5237	24.0253	17.3046	8.13667	0.0533333	0.01	23.7825	8.85	376.75	207	2	13	8	56756.7	351891	1.08973e+06
BDB-000036643	04085170	WMIC	1993-06-06	44.9878	-87.1754	24.7654	6.94027	7.75	1.65	0.01	14.35	10.505	544.5	178	1	6	12	31081.9	33672.1	1.04383e+06
BDB-000042737	094196783	NVBR	2006-06-19	36.1397	-115.048	16.2399	-16.8727	8.18774	3.88764	0.0370264	17.2946	9.73416	3358.34	520	1	12	3	155085	76774.7	207292
BDB-000046849	400023105142301	SPLT	2003-06-26	40.0064	-105.24	19.2561	-7.8061	7.7	0.141	0.019	17.1	6.86	178	1605	1	16	8	115.511	5544.53	10598.1
